# Supplementary material for: Gene expression modules in primary breast cancers as risk factors for organotropic patterns of first metastatic spread: a case control study
Source: Springer Nature journal article supplement (doi:10.1186/s13058-017-0881-y), 2017-10-13
Supplement: MOESM5 [file 13058_2017_881_MOESM5_ESM.pdf]

Table 4

|                                 | V SERIES     |            |                     |             |                  | BV SERIES  |            |                     |             |                 | B SERIES   |            |                     |             |                 | ANY CASE TYPE |          |                     |             |                 |        |
|---------------------------------|--------------|------------|---------------------|-------------|------------------|------------|------------|---------------------|-------------|-----------------|------------|------------|---------------------|-------------|-----------------|---------------|----------|---------------------|-------------|-----------------|--------|
|                                 | Cases        | Controls   | n, uniq<br>Controls | OR (95% CI) | p                | Cases      | Controls   | n, uniq<br>Controls | OR (95% CI) | p               | Cases      | Controls   | n, uniq<br>Controls | OR (95% CI) | p               | Cases         | Controls | n, uniq<br>Controls | OR (95% CI) | p               |        |
| <b>Extracted RNA</b>            |              |            |                     |             |                  |            |            |                     |             |                 |            |            |                     |             |                 |               |          |                     |             |                 |        |
| ER IHC                          | ER-          | 99         | 76                  | 72          | Ref.             | 96         | 74         | 71                  | Ref.        | 50              | 68         | 64         | Ref.                | 245         | 218             | 184           | Ref.     |                     |             |                 |        |
|                                 | ER+          | 147        | 170                 | 160         | 0.67 (0.46-0.97) | 0.04       | 162        | 184                 | 174         | 0.69 (0.47-1.0) | 0.05       | 188        | 170                 | 158         | 1.5 (1.0-2.3)   | 0.05          | 497      | 524                 | 436         | 0.86 (0.68-1.1) | 0.2    |
| <b>Total</b>                    |              | <b>246</b> | <b>246</b>          | <b>232</b>  |                  | <b>258</b> | <b>258</b> | <b>245</b>          |             | <b>238</b>      | <b>238</b> | <b>222</b> |                     | <b>742</b>  | <b>742</b>      | <b>620</b>    |          |                     |             |                 |        |
| IHC subtypes                    | ER+HER2-     | 68         | 70                  | 67          | Ref.             | 78         | 74         | 72                  | Ref.        | 86              | 84         | 80         | Ref.                | 232         | 228             | 196           | Ref.     |                     |             |                 |        |
|                                 | ER+HER2+     | 23         | 25                  | 23          | 0.99 (0.50-1.9)  | 1.0        | 25         | 17                  | 17          | 1.4 (0.68-2.8)  | 0.4        | 22         | 15                  | 14          | 1.5 (0.71-3.1)  | 0.3           | 70       | 57                  | 43          | 1.4 (0.90-2.1)  | 0.1    |
|                                 | ER-HER2+     | 35         | 12                  | 12          | 2.9 (1.4-6.2)    | 0.005      | 30         | 13                  | 13          | 2.1 (1.0-4.5)   | 0.04       | 13         | 11                  | 9           | 1.3 (0.55-3.4)  | 0.5           | 78       | 36                  | 31          | 2.1 (1.4-3.4)   | 0.001  |
|                                 | TNBC         | 36         | 31                  | 30          | 1.2 (0.66-2.1)   | 0.6        | 33         | 25                  | 23          | 1.3 (0.71-2.5)  | 0.4        | 14         | 23                  | 23          | 0.57 (0.27-1.2) | 0.1           | 83       | 79                  | 68          | 1.0 (0.71-1.5)  | 0.9    |
|                                 | <b>Total</b> | <b>162</b> | <b>138</b>          | <b>132</b>  |                  | <b>166</b> | <b>129</b> | <b>125</b>          |             | <b>135</b>      | <b>133</b> | <b>126</b> |                     | <b>463</b>  | <b>400</b>      | <b>338</b>    |          |                     |             |                 |        |
| Not assigned (missing IHC data) |              | 84         | 108                 | 100         |                  | 92         | 129        | 120                 |             | 103             | 105        | 96         |                     | 279         | 342             | 282           |          |                     |             |                 |        |
| Total (extracted RNA)           |              | 246        | 246                 | 232         |                  | 258        | 258        | 245                 |             | 238             | 238        | 222        |                     | 742         | 742             | 620           |          |                     |             |                 |        |
| <b>GWDb</b>                     |              |            |                     |             |                  |            |            |                     |             |                 |            |            |                     |             |                 |               |          |                     |             |                 |        |
| PAM50                           | Luminal A    | 21         | 34                  | 33          | Ref.             | 33         | 45         | 42                  | Ref.        | 32              | 45         | 42         | Ref.                | 86          | 124             | 109           | Ref.     |                     |             |                 |        |
|                                 | Luminal B    | 17         | 9                   | 9           | 3.0 (1.1-8.2)    | 0.03       | 26         | 13                  | 12          | 2.7 (1.2-6.4)   | 0.02       | 28         | 16                  | 15          | 2.5 (1.1-5.4)   | 0.02          | 71       | 38                  | 35          | 2.6 (1.6-4.2)   | 0.0002 |
|                                 | Basal        | 28         | 17                  | 15          | 2.9 (1.3-6.9)    | 0.01       | 21         | 13                  | 13          | 2.1 (0.9-4.8)   | 0.09       | 9          | 17                  | 16          | 0.74 (0.28-1.9) | 0.5           | 58       | 47                  | 40          | 1.8 (1.1-3.0)   | 0.02   |
|                                 | HER2         | 30         | 15                  | 14          | 3.4 (1.5-8.0)    | 0.005      | 20         | 12                  | 12          | 2.1 (0.92-5.1)  | 0.08       | 18         | 12                  | 10          | 2.4 (0.98-6.0)  | 0.06          | 68       | 39                  | 33          | 2.6 (1.6-4.4)   | <1e-4  |
|                                 | Normal       | 9          | 11                  | 11          | 1.3 (0.45-3.6)   | 0.6        | 6          | 7                   | 7           | 1.1 (0.32-3.6)  | 0.9        | 11         | 8                   | 7           | 2.1 (0.7-6.2)   | 0.2           | 26       | 26                  | 23          | 1.4 (0.76-2.7)  | 0.3    |
|                                 | <b>Total</b> | <b>105</b> | <b>86</b>           | <b>82</b>   |                  | <b>106</b> | <b>90</b>  | <b>86</b>           |             | <b>98</b>       | <b>98</b>  | <b>90</b>  |                     | <b>309</b>  | <b>274</b>      | <b>240</b>    |          |                     |             |                 |        |
| Not assigned (not in GWDb)      |              | 141        | 160                 | 150         |                  | 152        | 168        | 159                 |             | 140             | 140        | 132        |                     | 433         | 468             | 380           |          |                     |             |                 |        |
| Total (extracted RNA)           |              | 246        | 246                 | 232         |                  | 258        | 258        | 245                 |             | 238             | 238        | 222        |                     | 742         | 742             | 620           |          |                     |             |                 |        |
| IntClust, grouped 3             |              | 9          | 21                  | 20          | Ref.             | 14         | 25         | 25                  | Ref.        | 19              | 25         | 23         | Ref.                | 42          | 71              | 66            | Ref.     |                     |             |                 |        |
|                                 | 1,6,9        | 20         | 8                   | 8           | 5.6 (1.8-18)     | 0.003      | 26         | 13                  | 12          | 3.9 (1.5-10)    | 0.01       | 18         | 17                  | 15          | 1.5 (0.45-1.5)  | 0.4           | 64       | 38                  | 35          | 2.9 (1.6-5.1)   | 0.0003 |
|                                 | 2,4          | 24         | 18                  | 17          | 3.1 (1.2-8.9)    | 0.03       | 14         | 18                  | 17          | 1.5 (0.6-3.9)   | 0.4        | 26         | 14                  | 13          | 2.4 (1.0-6.1)   | 0.05          | 64       | 50                  | 42          | 2.4 (1.4-4.2)   | 0.002  |
|                                 | 5            | 20         | 6                   | 5           | 8.9 (2.7-34)     | 0.001      | 17         | 3                   | 3           | 10 (2.8-49)     | 0.001      | 7          | 5                   | 4           | 2.1 (0.55-9.1)  | 0.3           | 44       | 14                  | 11          | 6.3 (3.0-14)    | <1e-4  |
|                                 | 7,8          | 12         | 22                  | 21          | 1.3 (0.44-3.7)   | 0.7        | 22         | 23                  | 21          | 1.9 (0.78-4.6)  | 0.2        | 24         | 27                  | 26          | 1.1 (0.49-2.6)  | 0.8           | 58       | 72                  | 59          | 1.5 (0.91-2.6)  | 0.1    |
|                                 | 10           | 20         | 11                  | 11          | 4.0 (1.4-12)     | 0.01       | 13         | 8                   | 8           | 2.9 (0.99-9.0)  | 0.06       | 4          | 10                  | 9           | 0.54 (0.13-1.9) | 0.4           | 37       | 29                  | 27          | 2.2 (1.2-4.1)   | 0.02   |
|                                 | <b>Total</b> | <b>105</b> | <b>86</b>           | <b>82</b>   |                  | <b>106</b> | <b>90</b>  | <b>86</b>           |             | <b>98</b>       | <b>98</b>  | <b>90</b>  |                     | <b>309</b>  | <b>274</b>      | <b>240</b>    |          |                     |             |                 |        |
| Not assigned (not in GWDb)      |              | 141        | 160                 | 150         |                  | 152        | 168        | 159                 |             | 140             | 140        | 132        |                     | 433         | 468             | 380           |          |                     |             |                 |        |
| Total (extracted RNA)           |              | 246        | 246                 | 232         |                  | 258        | 258        | 245                 |             | 238             | 238        | 222        |                     | 742         | 742             | 620           |          |                     |             |                 |        |

Footnotes: Logistic regression model.

stats::glm, Case\_Control ~ x, family="binomial"

Note: This is an unpaired test. A small number of patients were duplicated within a control series by design; here, patients were de-duplicated within each control series ("n, uniq"). There are no duplicates within each case series by design. Duplicates were permitted between cases and controls. Entries with missing values in the independent variable were excluded.
