# Supplementary material for: Gene expression modules in primary breast cancers as risk factors for organotropic patterns of first metastatic spread: a case control study
Source: Breast Cancer Res. 2017 Oct 13;19:113. doi: 10.1186/s13058-017-0881-y (PMC5640935; doi:10.1186/s13058-017-0881-y)
Supplement: Supplementary file 3 — Tables S1-S2 and S4-S5. (XLSX 365 kb) [file 13058_2017_881_MOESM3_ESM.xlsx]

## Sheet: Description
Supplementary Tables S1-S2 and S4-S5
Supplementary Table 1A. Case-control series overview
Supplementary Table 1B. Metastatic characteristics of GWDb.
Supplementary Table S2A. Gene modules and references. Gene mappings are shown in Table S2B.
Supplementary Table S2B. List of genes in each gene module. See Supplementary Table S2A for references.
[Supplementary Table S3 is in AdditionalFile6]
Supplementary Table S4. Probes associated with BV metastatic spread.
Supplementary Table S5. Statistics and estimates for putative BV gene module

## Sheet: TableS1A_Overview_CCseries
	Supplementary Table 1A. Case-control series overview
					Case-control series, case type:	"Visceral only"		"Bone & visceral"		"Bone only"		Combined
						Cases	Controls	Cases	Controls	Cases	Controls	Cases	Controls		Case-control OR, sig panel, GWDb
						V_caseSeries	V_controlSeries	BV_caseSeries	BV_controlSeries	B_caseSeries	B_controlSeries	caseSeries (all)	controlSeries (all)
			Case-control design (400 c/ctrl sets, indexed by 'Random_Selection')		# Patients (allow dups within column) =	400	400	400	400	400	400
			RNA extracted, exists c/ctrl pair of extracted RNA (where at least once of the pair was extracted in the case/control context in the respective 'Random_Selection' sample set)		# Patients (allow dups within column) =	246	246	258	258	238	238	742	742
					# Patients (unique within column) =	246	232	258	245	238	222	742	620	Total=1441 (1277 unique patients)
			Present in GWDb, unpaired (i.e. case AND/OR control are present)		# Patients (allow dups within column) =	105	86	106	90	98	98	309	274
					# Patients (unique within column) =	105	82	106	86	98	90	309	240	Total=567 (521 unique patients)	"ccPaired_caseGWDb" (Main Fig)
			Present in GWDb, paired (i.e. case AND control are present)		# Patients (allow dups within column) =	51	51	51	51	50	50	152	152
					# Patients (unique within column) =	51	50	51	51	50	49	152	148	Total=302 (293 unique patients)	"ccPaired_caseAndControlGWDb" (Suppl)
			Present in GWDa(only), unpaired (i.e. case AND/OR control are present)		# Patients (allow dups within column) =	20	31	23	18	19	24
					# Patients (unique within column) =	20	28	23	18	19	23			Total=131 (114 unique patients)
						V_caseSeries	V_controlSeries	BV_caseSeries	BV_controlSeries	B_caseSeries	B_controlSeries	caseSeries (all)	controlSeries (all)
	Stratified by ER status (require both IHC and ESR1-positive)
	GWDb	ERpos	In GWDb, ER-pos, unpaired (i.e. the paired sample has any GWDb/ER status and is excluded if ER-neg)		# Patients (allow dups within column) =	52	52	65	65	72	66	189	183
					# Patients (unique within column) =	52	50	65	61	72	62	189	161		"ccPaired_caseGWDb_ERpos" (Suppl)
			In GWDb, ER-pos, paired by ER status (i.e. the paired sample has the same ER status, but may be in either GWDb/GWDa (need ESR1))		# Patients (allow dups within column) =	23	21	32	31	31	32	86	84
					# Patients (unique within column) =	23	21	32	31	31	32	86	84		"ccPaired_caseGWDb_bothERpos" (Main fig)
			In GWDb, ER-pos, paired in GWDb by ER status (i.e. the paired sample is in the same GWD and same ER status)		# Patients (allow dups within column) =	21	21	28	28	28	28	77	77
					# Patients (unique within column) =	21	21	28	28	28	28	77	77		"ccPaired_caseAndControlGWDb_bothERpos" (Suppl)
		ERneg	In GWDb, ER-neg, unpaired (i.e. the paired sample has any GWDb/ER status and is excluded if ER-pos)		# Patients (allow dups within column) =	42	21	25	15	12	19	79	55
					# Patients (unique within column) =	42	20	25	15	12	18	79	48		"ccPaired_caseGWDb_ERneg" (Suppl)
			In GWDb, ER-neg, paired by ER status (i.e. the paired sample has the same ER status, but may be in either GWDb/GWDa (need ESR1))		# Patients (allow dups within column) =			6	5			10	9
					# Patients (unique within column) =			6	5			10	9		"ccPaired_caseGWDb_bothERneg" (Main fig)
			In GWDb, ER-neg, paired in GWDb by ER status (i.e. the paired sample is in the same GWD and same ER status)		# Patients (allow dups within column) =			5	5			7	7
					# Patients (unique within column) =			5	5			7	7		"ccPaired_caseAndControlGWDb_bothERneg" (Suppl)
	GWDa(only)	ERpos	In GWDa, ER-pos, unpaired (i.e. the paired sample has any GWDa/ER status)		# Patients (allow dups within column) =
					# Patients (unique within column) =
			In GWDa, ER-pos, paired by ER status (i.e. the paired sample has the same ER status, but may be in either GWD (need ESR1))		# Patients (allow dups within column) =
					# Patients (unique within column) =
			In GWDa, ER-pos, paired by in GWDa by ER status (i.e. the paired sample is in the same GWD and same ER status)		# Patients (allow dups within column) =
					# Patients (unique within column) =
		ERneg	In GWDa, ER-neg, unpaired (i.e. the paired sample has any GWDa/ER status)		# Patients (allow dups within column) =
					# Patients (unique within column) =
			In GWDa, ER-neg, paired by ER status (i.e. the paired sample has the same ER status, but may be in either GWD (need ESR1))		# Patients (allow dups within column) =
					# Patients (unique within column) =
			In GWDa, ER-neg, paired in GWDa by ER status (i.e. the paired sample is in the same GWD and same ER status)		# Patients (allow dups within column) =
					# Patients (unique within column) =

## Sheet: TableS1B_metsChar
	Supplementary Table 1B. Metastatic characteristics of GWDb.
			First metastatic spread (irrespective of case-control status)
			Bone only (within 6mths of first site)		Bone + Visceral (within 6mths of first site)		Visceral only (within 6mths of first site)		No metastasis
			Number	(%)	Number	(%)	Number	(%)	Number	(%)
		Total:	97	(100%)	123	(100%)	121	(100%)	186	(100%)
	Bone mets	no	-	-	-	-	102	(84%)	-	-
		yes	97	(100%)	123	(100%)	19	(16%)	-	-
			Time to bone mets, median (y)	2.9	median (y)	2.7	median (y)	5.2
	Visceral mets (any site)	no	61	(63%)	-	-	-	-	-	-
		yes	36	(37%)	123	(100%)	121	(100%)	-	-
			Time to visceral mets, median (y)	4.1	median (y)	2.6	median (y)	2.6
	Lung mets	no	86	(89%)	70	(57%)	74	(61%)	-	-
		yes	11	(11%)	53	(43%)	47	(39%)	-	-
			Time to lung mets, median (y)	4.1	median (y)	2.6	median (y)	2.9
	Liver mets	no	80	(82%)	59	(48%)	75	(62%)	-	-
		yes	17	(18%)	64	(52%)	46	(38%)	-	-
			Time to liver mets, median (y)	3.3	median (y)	2.8	median (y)	2.6
	Brain mets	no	94	(97%)	111	(90%)	87	(72%)	-	-
		yes	3	(3%)	12	(10%)	34	(28%)	-	-
			Time to brain mets, median (y)	2	median (y)	2.3	median (y)	2.7

## Sheet: TableS2A_moduleRefs
## Supplementary Table S2A. Gene modules and references. Gene mappings are shown in Table S2B.
Module label	Brief description	Reference(s)
AURKA	Genes previously found to co-express with AURKA. Proliferation module.	Desmedt et al. (2008) Clin Cancer Res, 14:5158–5165.
CIN70	Gene module reported to recapitulate chromosomal instability.	Carter et al. (2006) Nat Genet 38:1043-1048. Ignatiadis et al. (2012) J Clin Oncol, 30:1996–2004.
E2F3	Gene module developed from cell line to represent E2F3 pathway activity.	Bild et al. (2006) Nature 439:353-357. Ignatiadis et al. (2012) J Clin Oncol, 30:1996–2004.
GENE70	Prognostic gene module.	van’t Veer et al. (2002) Nature 415:530-536, 2002. Ignatiadis et al. (2012) J Clin Oncol, 30:1996–2004.
IGF1	Gene module describing activation of insulin-like growth factor 1.	Creighton CJ et al. (2008) J Clin Oncol 26:4078-4085. Ignatiadis et al. (2012) J Clin Oncol 30:1996–2004.
Immune1	Gene module for immune response with good prognosis in ER-negative breast cancer.	Teschendorff et al. (2007) Genome Biol 8:R157 Ignatiadis et al. (2012) J Clin Oncol 30:1996–2004.
Immune2	Genes previously found to co-express with STAT1. Immune response gene module.	Desmedt et al. (2008) Clin Cancer Res 14:5158-5165. Ignatiadis et al. (2012) J Clin Oncol 30:1996–2004.
PTEN	Gene expression signature of aberrant PTEN tumor suppressor pathway activity	Saal LH et al. (2007) PNAS 104:7564-7569. Ignatiadis et al. (2012) J Clin Oncol 30:1996–2004.
Stroma	Stroma-related gene module.	Farmer P (2009)Nat Med 15:68-74. Ignatiadis et al. (2012) J Clin Oncol 30:1996–2004.
Tcell	T-cell signature.	Palmer et al. (2006) BMC Genomics, 7:115
MS_residual	Gene signature derived from CD44+/CD24-low mammospheres. Relevant for residual disease and tumour-initiating potential.	Creighton et al. (2009) PNAS 106:13820–5.
TBRS	Gene signature capturing a TGFb response in human epithelial cells.	Padua et al. (2008) Cell, 133:66–77.
SigA_TGFb	Genes upregulated in CD44+ and PROCR+ versus CD24+ cells. Relevant to TGFb pathway activation and prognosis.	Shipitsin et al. (2007) Cancer Cell 11:259–73.
SigB_TGFb	Genes downregulated in CD44+ and PROCR+ versus CD24+ cells.	Shipitsin et al. (2007) Cancer Cell 11:259–73.
hNMSC	Gene signature derived from human normal mammary stem cells.	Pece et al. (2010) Cell 140:62–73.
HIS	Human invasion signature (HIS) derived from migratory cells of the primary tumor.	Patsialou et al. (2012) Breast Cancer Res, 14:R139
MaSC	Mammary stem cell signature derived from mouse model. Prognostic in triple-negative breast cancer.	Soady et al. (2015) Breast Cancer Res, 17:1–23.
Liver_metsSig	Genes selective for liver metastasis.	Kimbung et al. (2016) Clin Cancer Res 22:146–157.
Brain_metsSig	Genes mediating metastasis to the brain.	Bos et al. (2009) Nature 459:1005–9.
Brain_infiltSig	Genes mediating blood-brain-barrier infiltration.	Bos et al. (2009) Nature 459:1005–9.
Hypoxia_lungMets	A hypoxia response signature in lung-metastatic breast cancers.	Lu et al. (2010) Cancer Research, 70:3905–3914.
Hypoxia_boneMets	A hypoxia response signature in bone-metastatic breast cancers.	Lu et al. (2010) Cancer Research, 70:3905–3914.
Bone_metsSig	Genes mediating metastasis to bone.	Kang et al. (2003) Cancer Cell 3:537–49.
Mid_burden	Gene signature derived from metastatic cells from tissues with intermediate burden.	Lawson et al. (2015) Nature 526:131–135.
Low_burden	Gene signature derived from metastatic cells from tissues with low burden.	Lawson et al. (2015) Nature 526:131–135.
AKTmTOR	Gene signature describing activation of AKT/mTOR signalling.	Majumder et al. (2004) Nat Med 10:594-601. Ignatiadis et al. (2012) J Clin Oncol, 30:1996–2004.

## Sheet: TableS2B_modulePanel
## Supplementary Table S2B. List of genes in each gene module. See Supplementary Table S2A for references.
Module label	Gene direction	sigName_component	orig_id_type	orig_id_collapsed	ensembl_gene_id	GWDb_dun_ENSEMBL	GWDb_dun_ENTREZID	GWDb_dun_SYMBOLREANN
AURKA	1	Desmedt2008_autoSplit.AURKA.Up	entrezgene	10112	ENSG00000112984	ENSG00000112984	10112	KIF20A
AURKA	1	Desmedt2008_autoSplit.AURKA.Up	entrezgene	10212	ENSG00000123136	ENSG00000123136	10212	DDX39A
AURKA	1	Desmedt2008_autoSplit.AURKA.Up	entrezgene	1033	ENSG00000100526	ENSG00000100526	1033	CDKN3
AURKA	1	Desmedt2008_autoSplit.AURKA.Up	entrezgene	10436	ENSG00000126749	--	--	--
AURKA	1	Desmedt2008_autoSplit.AURKA.Up	entrezgene	10535	ENSG00000104889	ENSG00000104889	10535	RNASEH2A
AURKA	1	Desmedt2008_autoSplit.AURKA.Up	entrezgene	10557	ENSG00000152464	ENSG00000152464	10557	RPP38
AURKA	1	Desmedt2008_autoSplit.AURKA.Up	entrezgene	1058	ENSG00000115163	ENSG00000115163	1058	CENPA
AURKA	1	Desmedt2008_autoSplit.AURKA.Up	entrezgene	10598	ENSG00000100591	ENSG00000100591	10598	AHSA1
AURKA	1	Desmedt2008_autoSplit.AURKA.Up	entrezgene	10615	ENSG00000076382	ENSG00000076382	10615	SPAG5
AURKA	1	Desmedt2008_autoSplit.AURKA.Up	entrezgene	10953	ENSG00000025772	ENSG00000025772	10953	TOMM34
AURKA	1	Desmedt2008_autoSplit.AURKA.Up	entrezgene	10992	ENSG00000087365	ENSG00000087365	10992	SF3B2
AURKA	1	Desmedt2008_autoSplit.AURKA.Up	entrezgene	11004	ENSG00000142945	ENSG00000142945	11004	KIF2C
AURKA	1	Desmedt2008_autoSplit.AURKA.Up	entrezgene	11047	ENSG00000130706	ENSG00000130706	11047	ADRM1
AURKA	1	Desmedt2008_autoSplit.AURKA.Up	entrezgene	11065	ENSG00000175063	ENSG00000175063	11065	UBE2C
AURKA	1	Desmedt2008_autoSplit.AURKA.Up	entrezgene	11171	ENSG00000023734	ENSG00000023734	11171	PT-WD
AURKA	1	Desmedt2008_autoSplit.AURKA.Up	entrezgene	11260	ENSG00000184575	ENSG00000184575	11260	XPOT
AURKA	1	Desmedt2008_autoSplit.AURKA.Up	entrezgene	1163	ENSG00000173207	ENSG00000173207	1163	CKS1B
AURKA	1	Desmedt2008_autoSplit.AURKA.Up	entrezgene	1164	ENSG00000123975	ENSG00000123975	1164	CKS2
AURKA	1	Desmedt2008_autoSplit.AURKA.Up	entrezgene	1478	ENSG00000101811	ENSG00000101811	1478	CSTF2
AURKA	1	Desmedt2008_autoSplit.AURKA.Up	entrezgene	1841	ENSG00000168393	--	--	--
AURKA	1	Desmedt2008_autoSplit.AURKA.Up	entrezgene	201254	ENSG00000169689	ENSG00000169689	201254	STRA13
AURKA	1	Desmedt2008_autoSplit.AURKA.Up	entrezgene	22827	ENSG00000179950	--	--	--
AURKA	1	Desmedt2008_autoSplit.AURKA.Up	entrezgene	22974	ENSG00000088325	ENSG00000088325	22974	TPX2
AURKA	1	Desmedt2008_autoSplit.AURKA.Up	entrezgene	2305	ENSG00000111206	ENSG00000111206	2305	FOXM1
AURKA	1	Desmedt2008_autoSplit.AURKA.Up	entrezgene	23212	ENSG00000179041	ENSG00000179041	23212	RRS1
AURKA	1	Desmedt2008_autoSplit.AURKA.Up	entrezgene	23397	ENSG00000121152	--	--	--
AURKA	1	Desmedt2008_autoSplit.AURKA.Up	entrezgene	23464	ENSG00000100116	ENSG00000100116	23464	GCAT
AURKA	1	Desmedt2008_autoSplit.AURKA.Up	entrezgene	24137	ENSG00000090889	ENSG00000090889	24137	KIF4A
AURKA	1	Desmedt2008_autoSplit.AURKA.Up	entrezgene	26039	ENSG00000184402	ENSG00000184402	26039	SS18L1
AURKA	1	Desmedt2008_autoSplit.AURKA.Up	entrezgene	26519	ENSG00000134809	ENSG00000134809	26519	TIMM10
AURKA	1	Desmedt2008_autoSplit.AURKA.Up	entrezgene	27235	ENSG00000173085	ENSG00000173085	27235	COQ2
AURKA	1	Desmedt2008_autoSplit.AURKA.Up	entrezgene	2781	ENSG00000128266	ENSG00000128266	2781	GNAZ
AURKA	1	Desmedt2008_autoSplit.AURKA.Up	entrezgene	29097	ENSG00000143771	ENSG00000143771	29097	CNIH4
AURKA	1	Desmedt2008_autoSplit.AURKA.Up	entrezgene	29844	ENSG00000105619	--	--	--
AURKA	1	Desmedt2008_autoSplit.AURKA.Up	entrezgene	3014	ENSG00000188486	ENSG00000188486	3014	H2AFX
AURKA	1	Desmedt2008_autoSplit.AURKA.Up	entrezgene	3028	ENSG00000072506	ENSG00000072506	3028	HSD17B10
AURKA	1	Desmedt2008_autoSplit.AURKA.Up	entrezgene	3181	ENSG00000122566	ENSG00000122566	3181	HNRNPA2B1
AURKA	1	Desmedt2008_autoSplit.AURKA.Up	entrezgene	3251	ENSG00000165704	ENSG00000165704	3251	HPRT1
AURKA	1	Desmedt2008_autoSplit.AURKA.Up	entrezgene	3297	ENSG00000185122	--	--	--
AURKA	1	Desmedt2008_autoSplit.AURKA.Up	entrezgene	332	ENSG00000089685	ENSG00000089685	332	BIRC5
AURKA	1	Desmedt2008_autoSplit.AURKA.Up	entrezgene	333	ENSG00000105290	ENSG00000105290	333	APLP1
AURKA	1	Desmedt2008_autoSplit.AURKA.Up	entrezgene	3396	ENSG00000167862	ENSG00000167862	3396	ICT1
AURKA	1	Desmedt2008_autoSplit.AURKA.Up	entrezgene	3638	ENSG00000186480	ENSG00000186480	3638	INSIG1
AURKA	1	Desmedt2008_autoSplit.AURKA.Up	entrezgene	3692	ENSG00000242372	ENSG00000242372	3692	EIF6
AURKA	1	Desmedt2008_autoSplit.AURKA.Up	entrezgene	3925	ENSG00000117632	ENSG00000117632	3925	STMN1
AURKA	1	Desmedt2008_autoSplit.AURKA.Up	entrezgene	3954	ENSG00000168924	ENSG00000168924	3954	LETM1
AURKA	1	Desmedt2008_autoSplit.AURKA.Up	entrezgene	4085	ENSG00000164109	ENSG00000164109	4085	MAD2L1
AURKA	1	Desmedt2008_autoSplit.AURKA.Up	entrezgene	4171	ENSG00000073111	ENSG00000073111	4171	MCM2
AURKA	1	Desmedt2008_autoSplit.AURKA.Up	entrezgene	4172	ENSG00000112118	ENSG00000112118	4172	MCM3
AURKA	1	Desmedt2008_autoSplit.AURKA.Up	entrezgene	4521	ENSG00000106268	ENSG00000106268	4521	NUDT1
AURKA	1	Desmedt2008_autoSplit.AURKA.Up	entrezgene	4719	ENSG00000023228	ENSG00000023228	4719	NDUFS1
AURKA	1	Desmedt2008_autoSplit.AURKA.Up	entrezgene	4751	ENSG00000117650	ENSG00000117650	4751	NEK2
AURKA	1	Desmedt2008_autoSplit.AURKA.Up	entrezgene	51022	ENSG00000023572	ENSG00000023572	51022	GLRX2
AURKA	1	Desmedt2008_autoSplit.AURKA.Up	entrezgene	51087	ENSG00000006047	ENSG00000006047	51087	YBX2
AURKA	1	Desmedt2008_autoSplit.AURKA.Up	entrezgene	51110	ENSG00000147592	ENSG00000147592	51110	LACTB2
AURKA	1	Desmedt2008_autoSplit.AURKA.Up	entrezgene	51123	ENSG00000120963	ENSG00000120963	51123	ZNF706
AURKA	1	Desmedt2008_autoSplit.AURKA.Up	entrezgene	51142	ENSG00000106153	ENSG00000106153	51142	CHCHD2
AURKA	1	Desmedt2008_autoSplit.AURKA.Up	entrezgene	5119	ENSG00000131165	ENSG00000131165	5119	CHMP1A
AURKA	1	Desmedt2008_autoSplit.AURKA.Up	entrezgene	51204	ENSG00000136463	ENSG00000136463	51204	TACO1
AURKA	1	Desmedt2008_autoSplit.AURKA.Up	entrezgene	51512	ENSG00000075218	--	--	--
AURKA	1	Desmedt2008_autoSplit.AURKA.Up	entrezgene	51659	ENSG00000131153	ENSG00000131153	51659	GINS2
AURKA	1	Desmedt2008_autoSplit.AURKA.Up	entrezgene	53820	ENSG00000183145	ENSG00000183145	53820	DSCR6
AURKA	1	Desmedt2008_autoSplit.AURKA.Up	entrezgene	5424	ENSG00000062822	ENSG00000062822	5424	POLD1
AURKA	1	Desmedt2008_autoSplit.AURKA.Up	entrezgene	5433	ENSG00000144231	ENSG00000144231	5433	POLR2D
AURKA	1	Desmedt2008_autoSplit.AURKA.Up	entrezgene	54478	ENSG00000129195	ENSG00000129195	54478	FAM64A
AURKA	1	Desmedt2008_autoSplit.AURKA.Up	entrezgene	54512	ENSG00000178896	--	--	--
AURKA	1	Desmedt2008_autoSplit.AURKA.Up	entrezgene	54535	ENSG00000204536	--	--	--
AURKA	1	Desmedt2008_autoSplit.AURKA.Up	entrezgene	54606	ENSG00000136271	ENSG00000136271	54606	DDX56
AURKA	1	Desmedt2008_autoSplit.AURKA.Up	entrezgene	54821	ENSG00000186871	ENSG00000186871	54821	ERCC6L
AURKA	1	Desmedt2008_autoSplit.AURKA.Up	entrezgene	54845	ENSG00000104413	ENSG00000104413	54845	ESRP1
AURKA	1	Desmedt2008_autoSplit.AURKA.Up	entrezgene	54915	ENSG00000149658	ENSG00000149658	54915	YTHDF1
AURKA	1	Desmedt2008_autoSplit.AURKA.Up	entrezgene	54963	ENSG00000198276	ENSG00000198276	54963	UCKL1
AURKA	1	Desmedt2008_autoSplit.AURKA.Up	entrezgene	55038	ENSG00000170779	ENSG00000170779	55038	CDCA4
AURKA	1	Desmedt2008_autoSplit.AURKA.Up	entrezgene	55247	ENSG00000109674	ENSG00000109674	55247	NEIL3
AURKA	1	Desmedt2008_autoSplit.AURKA.Up	entrezgene	55257	ENSG00000101189	ENSG00000101189	55257	C20orf20
AURKA	1	Desmedt2008_autoSplit.AURKA.Up	entrezgene	55353	ENSG00000104341	ENSG00000104341	55353	LAPTM4B
AURKA	1	Desmedt2008_autoSplit.AURKA.Up	entrezgene	55379	ENSG00000108829	ENSG00000108829	55379	LRRC59
AURKA	1	Desmedt2008_autoSplit.AURKA.Up	entrezgene	55388	ENSG00000065328	ENSG00000065328	55388	MCM10
AURKA	1	Desmedt2008_autoSplit.AURKA.Up	entrezgene	55526	ENSG00000181192	ENSG00000181192	55526	DHTKD1
AURKA	1	Desmedt2008_autoSplit.AURKA.Up	entrezgene	5557	ENSG00000198056	ENSG00000198056	5557	PRIM1
AURKA	1	Desmedt2008_autoSplit.AURKA.Up	entrezgene	55630	ENSG00000147804	--	--	--
AURKA	1	Desmedt2008_autoSplit.AURKA.Up	entrezgene	55732	ENSG00000000460	ENSG00000000460	55732	C1orf112
AURKA	1	Desmedt2008_autoSplit.AURKA.Up	entrezgene	55839	ENSG00000166451	ENSG00000166451	55839	CENPN
AURKA	1	Desmedt2008_autoSplit.AURKA.Up	entrezgene	55922	ENSG00000186416	ENSG00000186416	55922	NKRF
AURKA	1	Desmedt2008_autoSplit.AURKA.Up	entrezgene	56270	ENSG00000141580	ENSG00000141580	56270	WDR45L
AURKA	1	Desmedt2008_autoSplit.AURKA.Up	entrezgene	58500	ENSG00000196150	ENSG00000196150	58500	ZNF250
AURKA	1	Desmedt2008_autoSplit.AURKA.Up	entrezgene	5984	ENSG00000163918	ENSG00000163918	5984	RFC4
AURKA	1	Desmedt2008_autoSplit.AURKA.Up	entrezgene	60436	ENSG00000118707	ENSG00000118707	60436	TGIF2
AURKA	1	Desmedt2008_autoSplit.AURKA.Up	entrezgene	6199	ENSG00000175634	ENSG00000175634	6199	RPS6KB2
AURKA	1	Desmedt2008_autoSplit.AURKA.Up	entrezgene	6241	ENSG00000171848	ENSG00000171848	6241	RRM2
AURKA	1	Desmedt2008_autoSplit.AURKA.Up	entrezgene	6286	ENSG00000163993	ENSG00000163993	6286	S100P
AURKA	1	Desmedt2008_autoSplit.AURKA.Up	entrezgene	6338	ENSG00000168447	ENSG00000168447	6338	SCNN1B
AURKA	1	Desmedt2008_autoSplit.AURKA.Up	entrezgene	641	ENSG00000197299	ENSG00000197299	641	BLM
AURKA	1	Desmedt2008_autoSplit.AURKA.Up	entrezgene	64785	ENSG00000181938	ENSG00000181938	64785	GINS3
AURKA	1	Desmedt2008_autoSplit.AURKA.Up	entrezgene	6491	ENSG00000123473	ENSG00000123473	6491	STIL
AURKA	1	Desmedt2008_autoSplit.AURKA.Up	entrezgene	65094	ENSG00000081692	ENSG00000081692	65094	JMJD4
AURKA	1	Desmedt2008_autoSplit.AURKA.Up	entrezgene	6513	ENSG00000117394	ENSG00000117394	6513	SLC2A1
AURKA	1	Desmedt2008_autoSplit.AURKA.Up	entrezgene	6631	ENSG00000124562	ENSG00000124562	6631	SNRPC
AURKA	1	Desmedt2008_autoSplit.AURKA.Up	entrezgene	6634	ENSG00000100028	ENSG00000100028	6634	SNRPD3
AURKA	1	Desmedt2008_autoSplit.AURKA.Up	entrezgene	6790	ENSG00000087586	ENSG00000087586	6790	AURKA
AURKA	1	Desmedt2008_autoSplit.AURKA.Up	entrezgene	6832	ENSG00000156502	ENSG00000156502	6832	SUPV3L1
AURKA	1	Desmedt2008_autoSplit.AURKA.Up	entrezgene	6839	ENSG00000101945	ENSG00000101945	6839	SUV39H1
AURKA	1	Desmedt2008_autoSplit.AURKA.Up	entrezgene	7064	ENSG00000172009	ENSG00000172009	7064	THOP1
AURKA	1	Desmedt2008_autoSplit.AURKA.Up	entrezgene	7083	ENSG00000167900	ENSG00000167900	7083	TK1
AURKA	1	Desmedt2008_autoSplit.AURKA.Up	entrezgene	7164	ENSG00000111907	ENSG00000111907	7164	TPD52L1
AURKA	1	Desmedt2008_autoSplit.AURKA.Up	entrezgene	7226	ENSG00000142185	ENSG00000142185	7226	TRPM2
AURKA	1	Desmedt2008_autoSplit.AURKA.Up	entrezgene	7283	ENSG00000131462	ENSG00000131462	7283	TUBG1
AURKA	1	Desmedt2008_autoSplit.AURKA.Up	entrezgene	7298	ENSG00000176890	ENSG00000176890	7298	TYMS
AURKA	1	Desmedt2008_autoSplit.AURKA.Up	entrezgene	7718	ENSG00000197279	ENSG00000197279	7718	ZNF165
AURKA	1	Desmedt2008_autoSplit.AURKA.Up	entrezgene	79000	ENSG00000127423	ENSG00000127423	79000	C1orf135
AURKA	1	Desmedt2008_autoSplit.AURKA.Up	entrezgene	79042	ENSG00000170892	--	--	--
AURKA	1	Desmedt2008_autoSplit.AURKA.Up	entrezgene	79682	ENSG00000151725	ENSG00000151725	79682	MLF1IP
AURKA	1	Desmedt2008_autoSplit.AURKA.Up	entrezgene	79763	ENSG00000063241	ENSG00000063241	79763	ISOC2
AURKA	1	Desmedt2008_autoSplit.AURKA.Up	entrezgene	79801	ENSG00000171241	ENSG00000171241	79801	SHCBP1
AURKA	1	Desmedt2008_autoSplit.AURKA.Up	entrezgene	79915	ENSG00000176208	ENSG00000176208	79915	ATAD5
AURKA	1	Desmedt2008_autoSplit.AURKA.Up	entrezgene	80775	ENSG00000144120	ENSG00000144120	80775	TMEM177
AURKA	1	Desmedt2008_autoSplit.AURKA.Up	entrezgene	8161	ENSG00000121058	ENSG00000121058	8161	COIL
AURKA	1	Desmedt2008_autoSplit.AURKA.Up	entrezgene	81887	ENSG00000001497	ENSG00000001497	81887	LAS1L
AURKA	1	Desmedt2008_autoSplit.AURKA.Up	entrezgene	8317	ENSG00000097046	ENSG00000097046	8317	CDC7
AURKA	1	Desmedt2008_autoSplit.AURKA.Up	entrezgene	8458	ENSG00000116830	ENSG00000116830	8458	TTF2
AURKA	1	Desmedt2008_autoSplit.AURKA.Up	entrezgene	84823	ENSG00000176619	ENSG00000176619	84823	LMNB2
AURKA	1	Desmedt2008_autoSplit.AURKA.Up	entrezgene	8544	ENSG00000087842	--	--	--
AURKA	1	Desmedt2008_autoSplit.AURKA.Up	entrezgene	8607	ENSG00000175792	ENSG00000175792	8607	RUVBL1
AURKA	1	Desmedt2008_autoSplit.AURKA.Up	entrezgene	8772	ENSG00000168040	ENSG00000168040	8772	FADD
AURKA	1	Desmedt2008_autoSplit.AURKA.Up	entrezgene	8805	ENSG00000122779	ENSG00000122779	8805	TRIM24
AURKA	1	Desmedt2008_autoSplit.AURKA.Up	entrezgene	8836	ENSG00000137563	ENSG00000137563	8836	GGH
AURKA	1	Desmedt2008_autoSplit.AURKA.Up	entrezgene	891	ENSG00000134057	ENSG00000134057	891	CCNB1
AURKA	1	Desmedt2008_autoSplit.AURKA.Up	entrezgene	8914	ENSG00000111602	ENSG00000111602	8914	TIMELESS
AURKA	1	Desmedt2008_autoSplit.AURKA.Up	entrezgene	9088	ENSG00000127564	ENSG00000127564	9088	PKMYT1
AURKA	1	Desmedt2008_autoSplit.AURKA.Up	entrezgene	9133	ENSG00000157456	ENSG00000157456	9133	CCNB2
AURKA	1	Desmedt2008_autoSplit.AURKA.Up	entrezgene	9156	ENSG00000174371	ENSG00000174371	9156	EXO1
AURKA	1	Desmedt2008_autoSplit.AURKA.Up	entrezgene	9319	ENSG00000071539	ENSG00000071539	9319	TRIP13
AURKA	1	Desmedt2008_autoSplit.AURKA.Up	entrezgene	9631	ENSG00000113569	ENSG00000113569	9631	NUP155
AURKA	1	Desmedt2008_autoSplit.AURKA.Up	entrezgene	9775	ENSG00000141543	ENSG00000141543	9775	EIF4A3
AURKA	1	Desmedt2008_autoSplit.AURKA.Up	entrezgene	9793	ENSG00000175216	ENSG00000175216	9793	CKAP5
AURKA	1	Desmedt2008_autoSplit.AURKA.Up	entrezgene	9824	ENSG00000198826	ENSG00000198826	9824	ARHGAP11A
AURKA	1	Desmedt2008_autoSplit.AURKA.Up	entrezgene	990	ENSG00000094804	ENSG00000094804	990	CDC6
AURKA	1	Desmedt2008_autoSplit.AURKA.Up	entrezgene	991	ENSG00000117399	ENSG00000117399	991	CDC20
AURKA	1	Desmedt2008_autoSplit.AURKA.Up	entrezgene	9986	ENSG00000173653	ENSG00000173653	9986	RCE1
AURKA	-1	Desmedt2008_autoSplit.AURKA.Down	entrezgene	1003	ENSG00000179776	ENSG00000179776	1003	CDH5
AURKA	-1	Desmedt2008_autoSplit.AURKA.Down	entrezgene	10129	ENSG00000073910	ENSG00000073910	10129	FRY
AURKA	-1	Desmedt2008_autoSplit.AURKA.Down	entrezgene	10161	ENSG00000139679	ENSG00000139679	10161	LPAR6
AURKA	-1	Desmedt2008_autoSplit.AURKA.Down	entrezgene	10186	ENSG00000183722	ENSG00000183722	10186	LHFP
AURKA	-1	Desmedt2008_autoSplit.AURKA.Down	entrezgene	10234	ENSG00000128606	ENSG00000128606	10234	LRRC17
AURKA	-1	Desmedt2008_autoSplit.AURKA.Down	entrezgene	10252	ENSG00000164056	ENSG00000164056	10252	SPRY1
AURKA	-1	Desmedt2008_autoSplit.AURKA.Down	entrezgene	10253	ENSG00000136158	ENSG00000136158	10253	SPRY2
AURKA	-1	Desmedt2008_autoSplit.AURKA.Down	entrezgene	10468	ENSG00000134363	ENSG00000134363	10468	FST
AURKA	-1	Desmedt2008_autoSplit.AURKA.Down	entrezgene	10580	ENSG00000095637	ENSG00000095637	10580	SORBS1
AURKA	-1	Desmedt2008_autoSplit.AURKA.Down	entrezgene	10956	ENSG00000135506	ENSG00000135506	10956	OS9
AURKA	-1	Desmedt2008_autoSplit.AURKA.Down	entrezgene	11081	ENSG00000139330	ENSG00000139330	11081	KERA
AURKA	-1	Desmedt2008_autoSplit.AURKA.Down	entrezgene	114625	ENSG00000164010	ENSG00000164010	114625	ERMAP
AURKA	-1	Desmedt2008_autoSplit.AURKA.Down	entrezgene	1746	ENSG00000115844	ENSG00000115844	1746	DLX2
AURKA	-1	Desmedt2008_autoSplit.AURKA.Down	entrezgene	1793	ENSG00000150760	ENSG00000150760	1793	DOCK1
AURKA	-1	Desmedt2008_autoSplit.AURKA.Down	entrezgene	1811	ENSG00000091138	ENSG00000091138	1811	SLC26A3
AURKA	-1	Desmedt2008_autoSplit.AURKA.Down	entrezgene	1848	ENSG00000139318	ENSG00000139318	1848	DUSP6
AURKA	-1	Desmedt2008_autoSplit.AURKA.Down	entrezgene	1933	ENSG00000114942	ENSG00000114942	1933	EEF1B2
AURKA	-1	Desmedt2008_autoSplit.AURKA.Down	entrezgene	2098	ENSG00000139684	ENSG00000139684	2098	ESD
AURKA	-1	Desmedt2008_autoSplit.AURKA.Down	entrezgene	2152	ENSG00000117525	ENSG00000117525	2152	F3
AURKA	-1	Desmedt2008_autoSplit.AURKA.Down	entrezgene	2205	ENSG00000179639	ENSG00000179639	2205	FCER1A
AURKA	-1	Desmedt2008_autoSplit.AURKA.Down	entrezgene	22998	ENSG00000064042	ENSG00000064042	22998	LIMCH1
AURKA	-1	Desmedt2008_autoSplit.AURKA.Down	entrezgene	2331	ENSG00000122176	ENSG00000122176	2331	FMOD
AURKA	-1	Desmedt2008_autoSplit.AURKA.Down	entrezgene	23371	ENSG00000111077	ENSG00000111077	23371	TENC1
AURKA	-1	Desmedt2008_autoSplit.AURKA.Down	entrezgene	23460	ENSG00000154262	ENSG00000154262	23460	ABCA6
AURKA	-1	Desmedt2008_autoSplit.AURKA.Down	entrezgene	2353	ENSG00000170345	ENSG00000170345	2353	FOS
AURKA	-1	Desmedt2008_autoSplit.AURKA.Down	entrezgene	2487	ENSG00000162998	ENSG00000162998	2487	FRZB
AURKA	-1	Desmedt2008_autoSplit.AURKA.Down	entrezgene	2581	ENSG00000054983	ENSG00000054983	2581	GALC
AURKA	-1	Desmedt2008_autoSplit.AURKA.Down	entrezgene	25960	ENSG00000020181	ENSG00000020181	25960	GPR124
AURKA	-1	Desmedt2008_autoSplit.AURKA.Down	entrezgene	2621	ENSG00000183087	ENSG00000183087	2621	GAS6
AURKA	-1	Desmedt2008_autoSplit.AURKA.Down	entrezgene	26289	ENSG00000154027	ENSG00000154027	26289	AK5
AURKA	-1	Desmedt2008_autoSplit.AURKA.Down	entrezgene	2669	ENSG00000164949	ENSG00000164949	2669	GEM
AURKA	-1	Desmedt2008_autoSplit.AURKA.Down	entrezgene	26872	ENSG00000164647	--	--	--
AURKA	-1	Desmedt2008_autoSplit.AURKA.Down	entrezgene	27123	ENSG00000155011	ENSG00000155011	27123	DKK2
AURKA	-1	Desmedt2008_autoSplit.AURKA.Down	entrezgene	27303	ENSG00000144642	ENSG00000144642	27303	RBMS3
AURKA	-1	Desmedt2008_autoSplit.AURKA.Down	entrezgene	2791	ENSG00000127920	ENSG00000127920	2791	GNG11
AURKA	-1	Desmedt2008_autoSplit.AURKA.Down	entrezgene	283	ENSG00000214274	ENSG00000214274	283	ANG
AURKA	-1	Desmedt2008_autoSplit.AURKA.Down	entrezgene	29087	ENSG00000151500	ENSG00000151500	29087	THYN1
AURKA	-1	Desmedt2008_autoSplit.AURKA.Down	entrezgene	3216	ENSG00000108511	ENSG00000108511	3216	HOXB6
AURKA	-1	Desmedt2008_autoSplit.AURKA.Down	entrezgene	3479	ENSG00000017427	ENSG00000017427	3479	IGF1
AURKA	-1	Desmedt2008_autoSplit.AURKA.Down	entrezgene	358	ENSG00000240583	ENSG00000240583	358	AQP1
AURKA	-1	Desmedt2008_autoSplit.AURKA.Down	entrezgene	397	ENSG00000111348	ENSG00000111348	397	ARHGDIB
AURKA	-1	Desmedt2008_autoSplit.AURKA.Down	entrezgene	4013	ENSG00000110002	ENSG00000110002	4013	VWA5A
AURKA	-1	Desmedt2008_autoSplit.AURKA.Down	entrezgene	4649	ENSG00000066933	ENSG00000066933	4649	MYO9A
AURKA	-1	Desmedt2008_autoSplit.AURKA.Down	entrezgene	4969	ENSG00000106809	ENSG00000106809	4969	OGN
AURKA	-1	Desmedt2008_autoSplit.AURKA.Down	entrezgene	49855	ENSG00000140386	ENSG00000140386	49855	SCAPER
AURKA	-1	Desmedt2008_autoSplit.AURKA.Down	entrezgene	51279	ENSG00000139178	ENSG00000139178	51279	C1RL
AURKA	-1	Desmedt2008_autoSplit.AURKA.Down	entrezgene	5187	ENSG00000179094	ENSG00000179094	5187	PER1
AURKA	-1	Desmedt2008_autoSplit.AURKA.Down	entrezgene	54785	ENSG00000196544	ENSG00000196544	54785	C17orf59
AURKA	-1	Desmedt2008_autoSplit.AURKA.Down	entrezgene	54861	ENSG00000163788	ENSG00000163788	54861	SNRK
AURKA	-1	Desmedt2008_autoSplit.AURKA.Down	entrezgene	55020	ENSG00000075234	ENSG00000075234	55020	TTC38
AURKA	-1	Desmedt2008_autoSplit.AURKA.Down	entrezgene	55068	ENSG00000120658	ENSG00000120658	55068	ENOX1
AURKA	-1	Desmedt2008_autoSplit.AURKA.Down	entrezgene	55799	ENSG00000157445	ENSG00000157445	55799	CACNA2D3
AURKA	-1	Desmedt2008_autoSplit.AURKA.Down	entrezgene	55857	ENSG00000088970	--	--	--
AURKA	-1	Desmedt2008_autoSplit.AURKA.Down	entrezgene	55970	ENSG00000172380	ENSG00000172380	55970	GNG12
AURKA	-1	Desmedt2008_autoSplit.AURKA.Down	entrezgene	56944	ENSG00000116774	ENSG00000116774	56944	OLFML3
AURKA	-1	Desmedt2008_autoSplit.AURKA.Down	entrezgene	57088	ENSG00000114698	ENSG00000114698	57088	PLSCR4
AURKA	-1	Desmedt2008_autoSplit.AURKA.Down	entrezgene	57125	ENSG00000161381	ENSG00000161381	57125	PLXDC1
AURKA	-1	Desmedt2008_autoSplit.AURKA.Down	entrezgene	57161	ENSG00000139946	ENSG00000139946	57161	PELI2
AURKA	-1	Desmedt2008_autoSplit.AURKA.Down	entrezgene	58190	ENSG00000144579	ENSG00000144579	58190	CTDSP1
AURKA	-1	Desmedt2008_autoSplit.AURKA.Down	entrezgene	594	ENSG00000083123	ENSG00000083123	594	BCKDHB
AURKA	-1	Desmedt2008_autoSplit.AURKA.Down	entrezgene	6424	ENSG00000106483	ENSG00000106483	6424	SFRP4
AURKA	-1	Desmedt2008_autoSplit.AURKA.Down	entrezgene	64321	ENSG00000164736	ENSG00000164736	64321	SOX17
AURKA	-1	Desmedt2008_autoSplit.AURKA.Down	entrezgene	6642	ENSG00000028528	ENSG00000028528	6642	SNX1
AURKA	-1	Desmedt2008_autoSplit.AURKA.Down	entrezgene	667	ENSG00000151914	ENSG00000151914	667	DST
AURKA	-1	Desmedt2008_autoSplit.AURKA.Down	entrezgene	7026	ENSG00000185551	ENSG00000185551	7026	NR2F2
AURKA	-1	Desmedt2008_autoSplit.AURKA.Down	entrezgene	7043	ENSG00000119699	ENSG00000119699	7043	TGFB3
AURKA	-1	Desmedt2008_autoSplit.AURKA.Down	entrezgene	7049	ENSG00000069702	ENSG00000069702	7049	TGFBR3
AURKA	-1	Desmedt2008_autoSplit.AURKA.Down	entrezgene	7056	ENSG00000178726	ENSG00000178726	7056	THBD
AURKA	-1	Desmedt2008_autoSplit.AURKA.Down	entrezgene	7098	ENSG00000164342	ENSG00000164342	7098	TLR3
AURKA	-1	Desmedt2008_autoSplit.AURKA.Down	entrezgene	7474	ENSG00000114251	ENSG00000114251	7474	WNT5A
AURKA	-1	Desmedt2008_autoSplit.AURKA.Down	entrezgene	79618	ENSG00000147421	ENSG00000147421	79618	HMBOX1
AURKA	-1	Desmedt2008_autoSplit.AURKA.Down	entrezgene	79652	ENSG00000131634	ENSG00000131634	79652	TMEM204
AURKA	-1	Desmedt2008_autoSplit.AURKA.Down	entrezgene	79679	ENSG00000134258	ENSG00000134258	79679	VTCN1
AURKA	-1	Desmedt2008_autoSplit.AURKA.Down	entrezgene	79776	ENSG00000091656	ENSG00000091656	79776	ZFHX4
AURKA	-1	Desmedt2008_autoSplit.AURKA.Down	entrezgene	79838	ENSG00000103534	ENSG00000103534	79838	TMC5
AURKA	-1	Desmedt2008_autoSplit.AURKA.Down	entrezgene	79864	ENSG00000109944	ENSG00000109944	79864	C11orf63
AURKA	-1	Desmedt2008_autoSplit.AURKA.Down	entrezgene	79901	ENSG00000071967	ENSG00000071967	79901	CYBRD1
AURKA	-1	Desmedt2008_autoSplit.AURKA.Down	entrezgene	79971	ENSG00000116729	ENSG00000116729	79971	WLS
AURKA	-1	Desmedt2008_autoSplit.AURKA.Down	entrezgene	8322	ENSG00000174804	ENSG00000174804	8322	FZD4
AURKA	-1	Desmedt2008_autoSplit.AURKA.Down	entrezgene	83989	ENSG00000113391	ENSG00000113391	83989	FAM172A
AURKA	-1	Desmedt2008_autoSplit.AURKA.Down	entrezgene	8404	ENSG00000152583	ENSG00000152583	8404	SPARCL1
AURKA	-1	Desmedt2008_autoSplit.AURKA.Down	entrezgene	857	ENSG00000105974	ENSG00000105974	857	CAV1
AURKA	-1	Desmedt2008_autoSplit.AURKA.Down	entrezgene	862	ENSG00000079102	ENSG00000079102	862	RUNX1T1
AURKA	-1	Desmedt2008_autoSplit.AURKA.Down	entrezgene	9037	ENSG00000112902	--	--	--
AURKA	-1	Desmedt2008_autoSplit.AURKA.Down	entrezgene	90627	ENSG00000133121	ENSG00000133121	90627	STARD13
AURKA	-1	Desmedt2008_autoSplit.AURKA.Down	entrezgene	9077	ENSG00000162595	ENSG00000162595	9077	DIRAS3
AURKA	-1	Desmedt2008_autoSplit.AURKA.Down	entrezgene	9353	ENSG00000145147	ENSG00000145147	9353	SLIT2
AURKA	-1	Desmedt2008_autoSplit.AURKA.Down	entrezgene	9358	ENSG00000198542	ENSG00000198542	9358	ITGBL1
CIN70	1	Ignatiadis2012_autoSplit.CIN70.Up	entrezgene	10112	ENSG00000112984	ENSG00000112984	10112	KIF20A
CIN70	1	Ignatiadis2012_autoSplit.CIN70.Up	entrezgene	10535	ENSG00000104889	ENSG00000104889	10535	RNASEH2A
CIN70	1	Ignatiadis2012_autoSplit.CIN70.Up	entrezgene	10635	ENSG00000111247	ENSG00000111247	10635	RAD51AP1
CIN70	1	Ignatiadis2012_autoSplit.CIN70.Up	entrezgene	11065	ENSG00000175063	ENSG00000175063	11065	UBE2C
CIN70	1	Ignatiadis2012_autoSplit.CIN70.Up	entrezgene	11130	ENSG00000122952	ENSG00000122952	11130	ZWINT
CIN70	1	Ignatiadis2012_autoSplit.CIN70.Up	entrezgene	11339	ENSG00000104147	ENSG00000104147	11339	OIP5
CIN70	1	Ignatiadis2012_autoSplit.CIN70.Up	entrezgene	1164	ENSG00000123975	ENSG00000123975	1164	CKS2
CIN70	1	Ignatiadis2012_autoSplit.CIN70.Up	entrezgene	1503	ENSG00000171793	--	--	--
CIN70	1	Ignatiadis2012_autoSplit.CIN70.Up	entrezgene	1717	ENSG00000172893	ENSG00000172893	1717	DHCR7
CIN70	1	Ignatiadis2012_autoSplit.CIN70.Up	entrezgene	1736	ENSG00000130826	ENSG00000130826	1736	DKC1
CIN70	1	Ignatiadis2012_autoSplit.CIN70.Up	entrezgene	1894	ENSG00000114346	ENSG00000114346	1894	ECT2
CIN70	1	Ignatiadis2012_autoSplit.CIN70.Up	entrezgene	1994	ENSG00000066044	ENSG00000066044	1994	ELAVL1
CIN70	1	Ignatiadis2012_autoSplit.CIN70.Up	entrezgene	2146	ENSG00000106462	ENSG00000106462	2146	EZH2
CIN70	1	Ignatiadis2012_autoSplit.CIN70.Up	entrezgene	2237	ENSG00000168496	ENSG00000168496	2237	FEN1
CIN70	1	Ignatiadis2012_autoSplit.CIN70.Up	entrezgene	22948	ENSG00000150753	ENSG00000150753	22948	CCT5
CIN70	1	Ignatiadis2012_autoSplit.CIN70.Up	entrezgene	22974	ENSG00000088325	ENSG00000088325	22974	TPX2
CIN70	1	Ignatiadis2012_autoSplit.CIN70.Up	entrezgene	2305	ENSG00000111206	ENSG00000111206	2305	FOXM1
CIN70	1	Ignatiadis2012_autoSplit.CIN70.Up	entrezgene	23165	ENSG00000155561	ENSG00000155561	23165	NUP205
CIN70	1	Ignatiadis2012_autoSplit.CIN70.Up	entrezgene	23306	ENSG00000166881	ENSG00000166881	23306	TMEM194A
CIN70	1	Ignatiadis2012_autoSplit.CIN70.Up	entrezgene	23397	ENSG00000121152	--	--	--
CIN70	1	Ignatiadis2012_autoSplit.CIN70.Up	entrezgene	23788	ENSG00000109919	ENSG00000109919	23788	MTCH2
CIN70	1	Ignatiadis2012_autoSplit.CIN70.Up	entrezgene	24137	ENSG00000090889	ENSG00000090889	24137	KIF4A
CIN70	1	Ignatiadis2012_autoSplit.CIN70.Up	entrezgene	25804	ENSG00000130520	ENSG00000130520	25804	LSM4
CIN70	1	Ignatiadis2012_autoSplit.CIN70.Up	entrezgene	2821	ENSG00000105220	ENSG00000105220	2821	GPI
CIN70	1	Ignatiadis2012_autoSplit.CIN70.Up	entrezgene	29028	ENSG00000156802	ENSG00000156802	29028	ATAD2
CIN70	1	Ignatiadis2012_autoSplit.CIN70.Up	entrezgene	29107	ENSG00000132661	ENSG00000132661	29107	NXT1
CIN70	1	Ignatiadis2012_autoSplit.CIN70.Up	entrezgene	2956	ENSG00000116062	ENSG00000116062	2956	MSH6
CIN70	1	Ignatiadis2012_autoSplit.CIN70.Up	entrezgene	3014	ENSG00000188486	ENSG00000188486	3014	H2AFX
CIN70	1	Ignatiadis2012_autoSplit.CIN70.Up	entrezgene	3015	ENSG00000164032	ENSG00000164032	3015	H2AFZ
CIN70	1	Ignatiadis2012_autoSplit.CIN70.Up	entrezgene	3068	ENSG00000143321	ENSG00000143321	3068	HDGF
CIN70	1	Ignatiadis2012_autoSplit.CIN70.Up	entrezgene	4085	ENSG00000164109	ENSG00000164109	4085	MAD2L1
CIN70	1	Ignatiadis2012_autoSplit.CIN70.Up	entrezgene	4171	ENSG00000073111	ENSG00000073111	4171	MCM2
CIN70	1	Ignatiadis2012_autoSplit.CIN70.Up	entrezgene	4176	ENSG00000166508	ENSG00000166508	4176	MCM7
CIN70	1	Ignatiadis2012_autoSplit.CIN70.Up	entrezgene	4706	ENSG00000004779	ENSG00000004779	4706	NDUFAB1
CIN70	1	Ignatiadis2012_autoSplit.CIN70.Up	entrezgene	4751	ENSG00000117650	ENSG00000117650	4751	NEK2
CIN70	1	Ignatiadis2012_autoSplit.CIN70.Up	entrezgene	5111	ENSG00000132646	ENSG00000132646	5111	PCNA
CIN70	1	Ignatiadis2012_autoSplit.CIN70.Up	entrezgene	54892	ENSG00000146918	ENSG00000146918	54892	NCAPG2
CIN70	1	Ignatiadis2012_autoSplit.CIN70.Up	entrezgene	55055	ENSG00000174442	ENSG00000174442	55055	ZWILCH
CIN70	1	Ignatiadis2012_autoSplit.CIN70.Up	entrezgene	55143	ENSG00000134690	ENSG00000134690	55143	CDCA8
CIN70	1	Ignatiadis2012_autoSplit.CIN70.Up	entrezgene	55165	ENSG00000138180	ENSG00000138180	55165	CEP55
CIN70	1	Ignatiadis2012_autoSplit.CIN70.Up	entrezgene	55388	ENSG00000065328	ENSG00000065328	55388	MCM10
CIN70	1	Ignatiadis2012_autoSplit.CIN70.Up	entrezgene	55723	ENSG00000105011	ENSG00000105011	55723	ASF1B
CIN70	1	Ignatiadis2012_autoSplit.CIN70.Up	entrezgene	55872	ENSG00000168078	ENSG00000168078	55872	PBK
CIN70	1	Ignatiadis2012_autoSplit.CIN70.Up	entrezgene	55907	ENSG00000111726	ENSG00000111726	55907	CMAS
CIN70	1	Ignatiadis2012_autoSplit.CIN70.Up	entrezgene	55969	ENSG00000101084	--	--	--
CIN70	1	Ignatiadis2012_autoSplit.CIN70.Up	entrezgene	5885	ENSG00000164754	ENSG00000164754	5885	RAD21
CIN70	1	Ignatiadis2012_autoSplit.CIN70.Up	entrezgene	5984	ENSG00000163918	ENSG00000163918	5984	RFC4
CIN70	1	Ignatiadis2012_autoSplit.CIN70.Up	entrezgene	60436	ENSG00000118707	ENSG00000118707	60436	TGIF2
CIN70	1	Ignatiadis2012_autoSplit.CIN70.Up	entrezgene	6240	ENSG00000167325	ENSG00000167325	6240	RRM1
CIN70	1	Ignatiadis2012_autoSplit.CIN70.Up	entrezgene	6241	ENSG00000171848	ENSG00000171848	6241	RRM2
CIN70	1	Ignatiadis2012_autoSplit.CIN70.Up	entrezgene	6427	ENSG00000161547	ENSG00000161547	6427	SRSF2
CIN70	1	Ignatiadis2012_autoSplit.CIN70.Up	entrezgene	6790	ENSG00000087586	ENSG00000087586	6790	AURKA
CIN70	1	Ignatiadis2012_autoSplit.CIN70.Up	entrezgene	7153	ENSG00000131747	ENSG00000131747	7153	TOP2A
CIN70	1	Ignatiadis2012_autoSplit.CIN70.Up	entrezgene	7272	ENSG00000112742	ENSG00000112742	7272	TTK
CIN70	1	Ignatiadis2012_autoSplit.CIN70.Up	entrezgene	7374	ENSG00000076248	ENSG00000076248	7374	UNG
CIN70	1	Ignatiadis2012_autoSplit.CIN70.Up	entrezgene	8318	ENSG00000093009	ENSG00000093009	8318	CDC45
CIN70	1	Ignatiadis2012_autoSplit.CIN70.Up	entrezgene	83461	ENSG00000111665	ENSG00000111665	83461	CDCA3
CIN70	1	Ignatiadis2012_autoSplit.CIN70.Up	entrezgene	84306	ENSG00000126249	ENSG00000126249	84306	PDCD2L
CIN70	1	Ignatiadis2012_autoSplit.CIN70.Up	entrezgene	86	ENSG00000136518	ENSG00000136518	86	ACTL6A
CIN70	1	Ignatiadis2012_autoSplit.CIN70.Up	entrezgene	891	ENSG00000134057	ENSG00000134057	891	CCNB1
CIN70	1	Ignatiadis2012_autoSplit.CIN70.Up	entrezgene	9055	ENSG00000198901	ENSG00000198901	9055	PRC1
CIN70	1	Ignatiadis2012_autoSplit.CIN70.Up	entrezgene	9133	ENSG00000157456	ENSG00000157456	9133	CCNB2
CIN70	1	Ignatiadis2012_autoSplit.CIN70.Up	entrezgene	9212	ENSG00000178999	ENSG00000178999	9212	AURKB
CIN70	1	Ignatiadis2012_autoSplit.CIN70.Up	entrezgene	9232	ENSG00000164611	ENSG00000164611	9232	PTTG1
CIN70	1	Ignatiadis2012_autoSplit.CIN70.Up	entrezgene	9319	ENSG00000071539	ENSG00000071539	9319	TRIP13
CIN70	1	Ignatiadis2012_autoSplit.CIN70.Up	entrezgene	9700	ENSG00000135476	ENSG00000135476	9700	ESPL1
CIN70	1	Ignatiadis2012_autoSplit.CIN70.Up	entrezgene	9793	ENSG00000175216	ENSG00000175216	9793	CKAP5
CIN70	1	Ignatiadis2012_autoSplit.CIN70.Up	entrezgene	983	ENSG00000170312	ENSG00000170312	983	CDK1
CIN70	1	Ignatiadis2012_autoSplit.CIN70.Up	entrezgene	9833	ENSG00000165304	ENSG00000165304	9833	MELK
CIN70	1	Ignatiadis2012_autoSplit.CIN70.Up	entrezgene	990	ENSG00000094804	ENSG00000094804	990	CDC6
CIN70	1	Ignatiadis2012_autoSplit.CIN70.Up	entrezgene	991	ENSG00000117399	ENSG00000117399	991	CDC20
CIN70	1	Ignatiadis2012_autoSplit.CIN70.Up	entrezgene	9918	ENSG00000010292	ENSG00000010292	9918	NCAPD2
E2F3	1	Ignatiadis2012_autoSplit.E2F3.Up	entrezgene	10018	ENSG00000153094	ENSG00000153094	10018	BCL2L11
E2F3	1	Ignatiadis2012_autoSplit.E2F3.Up	entrezgene	10023	ENSG00000165879	ENSG00000165879	10023	FRAT1
E2F3	1	Ignatiadis2012_autoSplit.E2F3.Up	entrezgene	10194	ENSG00000179981	ENSG00000179981	10194	TSHZ1
E2F3	1	Ignatiadis2012_autoSplit.E2F3.Up	entrezgene	1028	ENSG00000129757	ENSG00000129757	1028	CDKN1C
E2F3	1	Ignatiadis2012_autoSplit.E2F3.Up	entrezgene	1029	ENSG00000147889	ENSG00000147889	1029	CDKN2A
E2F3	1	Ignatiadis2012_autoSplit.E2F3.Up	entrezgene	10309	ENSG00000152669	ENSG00000152669	10309	CCNO
E2F3	1	Ignatiadis2012_autoSplit.E2F3.Up	entrezgene	1031	ENSG00000123080	ENSG00000123080	1031	CDKN2C
E2F3	1	Ignatiadis2012_autoSplit.E2F3.Up	entrezgene	1050	ENSG00000245848	ENSG00000245848	1050	CEBPA
E2F3	1	Ignatiadis2012_autoSplit.E2F3.Up	entrezgene	10612	ENSG00000110171	ENSG00000110171	10612	TRIM3
E2F3	1	Ignatiadis2012_autoSplit.E2F3.Up	entrezgene	10645	ENSG00000110931	ENSG00000110931	10645	CAMKK2
E2F3	1	Ignatiadis2012_autoSplit.E2F3.Up	entrezgene	10656	ENSG00000131773	ENSG00000131773	10656	KHDRBS3
E2F3	1	Ignatiadis2012_autoSplit.E2F3.Up	entrezgene	10675	ENSG00000114646	ENSG00000114646	10675	CSPG5
E2F3	1	Ignatiadis2012_autoSplit.E2F3.Up	entrezgene	109	ENSG00000138031	ENSG00000138031	109	ADCY3
E2F3	1	Ignatiadis2012_autoSplit.E2F3.Up	entrezgene	11000	ENSG00000143554	--	--	--
E2F3	1	Ignatiadis2012_autoSplit.E2F3.Up	entrezgene	11130	ENSG00000122952	ENSG00000122952	11130	ZWINT
E2F3	1	Ignatiadis2012_autoSplit.E2F3.Up	entrezgene	11168	ENSG00000164985	ENSG00000164985	11168	PSIP1
E2F3	1	Ignatiadis2012_autoSplit.E2F3.Up	entrezgene	1122	ENSG00000203668	ENSG00000203668	1122	CHML
E2F3	1	Ignatiadis2012_autoSplit.E2F3.Up	entrezgene	115752	ENSG00000166938	ENSG00000166938	115752	DIS3L
E2F3	1	Ignatiadis2012_autoSplit.E2F3.Up	entrezgene	116236	ENSG00000168792	ENSG00000168792	116236	ABHD15
E2F3	1	Ignatiadis2012_autoSplit.E2F3.Up	entrezgene	116238	ENSG00000160606	ENSG00000160606	116238	TLCD1
E2F3	1	Ignatiadis2012_autoSplit.E2F3.Up	entrezgene	117178	ENSG00000117155	ENSG00000117155	117178	SSX2IP
E2F3	1	Ignatiadis2012_autoSplit.E2F3.Up	entrezgene	123606	ENSG00000170113	ENSG00000170113	123606	NIPA1
E2F3	1	Ignatiadis2012_autoSplit.E2F3.Up	entrezgene	129607	ENSG00000134326	ENSG00000134326	129607	CMPK2
E2F3	1	Ignatiadis2012_autoSplit.E2F3.Up	entrezgene	130574	ENSG00000187123	ENSG00000187123	130574	LYPD6
E2F3	1	Ignatiadis2012_autoSplit.E2F3.Up	entrezgene	132332	ENSG00000164112	ENSG00000164112	132332	TMEM155
E2F3	1	Ignatiadis2012_autoSplit.E2F3.Up	entrezgene	134549	ENSG00000164403	ENSG00000164403	134549	SHROOM1
E2F3	1	Ignatiadis2012_autoSplit.E2F3.Up	entrezgene	1407	ENSG00000008405	ENSG00000008405	1407	CRY1
E2F3	1	Ignatiadis2012_autoSplit.E2F3.Up	entrezgene	144455	ENSG00000165891	ENSG00000165891	144455	E2F7
E2F3	1	Ignatiadis2012_autoSplit.E2F3.Up	entrezgene	147912	ENSG00000177045	ENSG00000177045	147912	SIX5
E2F3	1	Ignatiadis2012_autoSplit.E2F3.Up	entrezgene	149175	ENSG00000185090	ENSG00000185090	149175	MANEAL
E2F3	1	Ignatiadis2012_autoSplit.E2F3.Up	entrezgene	151194	ENSG00000144401	ENSG00000144401	151194	METTL21A
E2F3	1	Ignatiadis2012_autoSplit.E2F3.Up	entrezgene	158158	ENSG00000165105	ENSG00000165105	158158	RASEF
E2F3	1	Ignatiadis2012_autoSplit.E2F3.Up	entrezgene	1633	ENSG00000156136	ENSG00000156136	1633	DCK
E2F3	1	Ignatiadis2012_autoSplit.E2F3.Up	entrezgene	1857	ENSG00000161202	ENSG00000161202	1857	DVL3
E2F3	1	Ignatiadis2012_autoSplit.E2F3.Up	entrezgene	1917	ENSG00000101210	ENSG00000101210	1917	EEF1A2
E2F3	1	Ignatiadis2012_autoSplit.E2F3.Up	entrezgene	200845	ENSG00000168301	ENSG00000168301	200845	KCTD6
E2F3	1	Ignatiadis2012_autoSplit.E2F3.Up	entrezgene	201254	ENSG00000169689	ENSG00000169689	201254	STRA13
E2F3	1	Ignatiadis2012_autoSplit.E2F3.Up	entrezgene	2026	ENSG00000111674	ENSG00000111674	2026	ENO2
E2F3	1	Ignatiadis2012_autoSplit.E2F3.Up	entrezgene	207	ENSG00000142208	ENSG00000142208	207	AKT1
E2F3	1	Ignatiadis2012_autoSplit.E2F3.Up	entrezgene	2146	ENSG00000106462	ENSG00000106462	2146	EZH2
E2F3	1	Ignatiadis2012_autoSplit.E2F3.Up	entrezgene	2175	ENSG00000187741	ENSG00000187741	2175	FANCA
E2F3	1	Ignatiadis2012_autoSplit.E2F3.Up	entrezgene	221061	ENSG00000148468	ENSG00000148468	221061	FAM171A1
E2F3	1	Ignatiadis2012_autoSplit.E2F3.Up	entrezgene	221545	ENSG00000204564	--	--	--
E2F3	1	Ignatiadis2012_autoSplit.E2F3.Up	entrezgene	2237	ENSG00000168496	ENSG00000168496	2237	FEN1
E2F3	1	Ignatiadis2012_autoSplit.E2F3.Up	entrezgene	2254	ENSG00000102678	ENSG00000102678	2254	FGF9
E2F3	1	Ignatiadis2012_autoSplit.E2F3.Up	entrezgene	2261	ENSG00000068078	ENSG00000068078	2261	FGFR3
E2F3	1	Ignatiadis2012_autoSplit.E2F3.Up	entrezgene	22808	ENSG00000158186	ENSG00000158186	22808	MRAS
E2F3	1	Ignatiadis2012_autoSplit.E2F3.Up	entrezgene	23014	ENSG00000135108	ENSG00000135108	23014	FBXO21
E2F3	1	Ignatiadis2012_autoSplit.E2F3.Up	entrezgene	23089	ENSG00000242265	ENSG00000242265	23089	PEG10
E2F3	1	Ignatiadis2012_autoSplit.E2F3.Up	entrezgene	23097	ENSG00000155111	ENSG00000155111	23097	CDK19
E2F3	1	Ignatiadis2012_autoSplit.E2F3.Up	entrezgene	231	ENSG00000085662	ENSG00000085662	231	AKR1B1
E2F3	1	Ignatiadis2012_autoSplit.E2F3.Up	entrezgene	23129	ENSG00000004399	ENSG00000004399	23129	PLXND1
E2F3	1	Ignatiadis2012_autoSplit.E2F3.Up	entrezgene	23158	ENSG00000109436	ENSG00000109436	23158	TBC1D9
E2F3	1	Ignatiadis2012_autoSplit.E2F3.Up	entrezgene	23199	ENSG00000131149	ENSG00000131149	23199	KIAA0182
E2F3	1	Ignatiadis2012_autoSplit.E2F3.Up	entrezgene	23228	ENSG00000154822	ENSG00000154822	23228	PLCL2
E2F3	1	Ignatiadis2012_autoSplit.E2F3.Up	entrezgene	23234	ENSG00000213551	ENSG00000213551	23234	DNAJC9
E2F3	1	Ignatiadis2012_autoSplit.E2F3.Up	entrezgene	23336	ENSG00000182253	ENSG00000182253	23336	KIAA0353
E2F3	1	Ignatiadis2012_autoSplit.E2F3.Up	entrezgene	23456	ENSG00000135776	ENSG00000135776	23456	ABCB10
E2F3	1	Ignatiadis2012_autoSplit.E2F3.Up	entrezgene	23462	ENSG00000164683	ENSG00000164683	23462	HEY1
E2F3	1	Ignatiadis2012_autoSplit.E2F3.Up	entrezgene	23576	ENSG00000153904	ENSG00000153904	23576	DDAH1
E2F3	1	Ignatiadis2012_autoSplit.E2F3.Up	entrezgene	253152	ENSG00000172031	ENSG00000172031	253152	EPHX4
E2F3	1	Ignatiadis2012_autoSplit.E2F3.Up	entrezgene	253650	ENSG00000180071	--	--	--
E2F3	1	Ignatiadis2012_autoSplit.E2F3.Up	entrezgene	254887	ENSG00000184307	ENSG00000184307	254887	ZDHHC23
E2F3	1	Ignatiadis2012_autoSplit.E2F3.Up	entrezgene	25792	ENSG00000148337	ENSG00000148337	25792	CIZ1
E2F3	1	Ignatiadis2012_autoSplit.E2F3.Up	entrezgene	25837	ENSG00000167964	ENSG00000167964	25837	RAB26
E2F3	1	Ignatiadis2012_autoSplit.E2F3.Up	entrezgene	25907	ENSG00000249992	ENSG00000249992	25907	TMEM158
E2F3	1	Ignatiadis2012_autoSplit.E2F3.Up	entrezgene	25959	ENSG00000197256	ENSG00000197256	25959	KANK2
E2F3	1	Ignatiadis2012_autoSplit.E2F3.Up	entrezgene	26018	ENSG00000144749	ENSG00000144749	26018	LRIG1
E2F3	1	Ignatiadis2012_autoSplit.E2F3.Up	entrezgene	26033	ENSG00000107518	ENSG00000107518	26033	ATRNL1
E2F3	1	Ignatiadis2012_autoSplit.E2F3.Up	entrezgene	26100	ENSG00000157954	ENSG00000157954	26100	WIPI2
E2F3	1	Ignatiadis2012_autoSplit.E2F3.Up	entrezgene	2643	ENSG00000131979	ENSG00000131979	2643	GCH1
E2F3	1	Ignatiadis2012_autoSplit.E2F3.Up	entrezgene	26577	ENSG00000163710	ENSG00000163710	26577	PCOLCE2
E2F3	1	Ignatiadis2012_autoSplit.E2F3.Up	entrezgene	27065	ENSG00000168824	ENSG00000168824	27065	D4S234E
E2F3	1	Ignatiadis2012_autoSplit.E2F3.Up	entrezgene	27346	ENSG00000109084	--	--	--
E2F3	1	Ignatiadis2012_autoSplit.E2F3.Up	entrezgene	2743	ENSG00000109738	ENSG00000109738	2743	GLRB
E2F3	1	Ignatiadis2012_autoSplit.E2F3.Up	entrezgene	2774	ENSG00000141404	ENSG00000141404	2774	GNAL
E2F3	1	Ignatiadis2012_autoSplit.E2F3.Up	entrezgene	29028	ENSG00000156802	ENSG00000156802	29028	ATAD2
E2F3	1	Ignatiadis2012_autoSplit.E2F3.Up	entrezgene	29901	ENSG00000168061	ENSG00000168061	29901	SAC3D1
E2F3	1	Ignatiadis2012_autoSplit.E2F3.Up	entrezgene	29941	ENSG00000160447	ENSG00000160447	29941	PKN3
E2F3	1	Ignatiadis2012_autoSplit.E2F3.Up	entrezgene	29980	ENSG00000159147	ENSG00000159147	29980	DONSON
E2F3	1	Ignatiadis2012_autoSplit.E2F3.Up	entrezgene	3625	ENSG00000163083	ENSG00000163083	3625	INHBB
E2F3	1	Ignatiadis2012_autoSplit.E2F3.Up	entrezgene	3643	ENSG00000171105	ENSG00000171105	3643	INSR
E2F3	1	Ignatiadis2012_autoSplit.E2F3.Up	entrezgene	376267	ENSG00000139998	ENSG00000139998	376267	RAB15
E2F3	1	Ignatiadis2012_autoSplit.E2F3.Up	entrezgene	388228	ENSG00000188322	ENSG00000188322	388228	SBK1
E2F3	1	Ignatiadis2012_autoSplit.E2F3.Up	entrezgene	399474	ENSG00000253304	ENSG00000253304	399474	TMEM200B
E2F3	1	Ignatiadis2012_autoSplit.E2F3.Up	entrezgene	4038	ENSG00000134569	ENSG00000134569	4038	LRP4
E2F3	1	Ignatiadis2012_autoSplit.E2F3.Up	entrezgene	4091	ENSG00000137834	ENSG00000137834	4091	SMAD6
E2F3	1	Ignatiadis2012_autoSplit.E2F3.Up	entrezgene	4324	ENSG00000102996	ENSG00000102996	4324	MMP15
E2F3	1	Ignatiadis2012_autoSplit.E2F3.Up	entrezgene	441459	ENSG00000230453	--	--	--
E2F3	1	Ignatiadis2012_autoSplit.E2F3.Up	entrezgene	4602	ENSG00000118513	ENSG00000118513	4602	MYB
E2F3	1	Ignatiadis2012_autoSplit.E2F3.Up	entrezgene	4678	ENSG00000132780	ENSG00000132780	4678	NASP
E2F3	1	Ignatiadis2012_autoSplit.E2F3.Up	entrezgene	4747	ENSG00000277586	--	--	--
E2F3	1	Ignatiadis2012_autoSplit.E2F3.Up	entrezgene	5111	ENSG00000132646	ENSG00000132646	5111	PCNA
E2F3	1	Ignatiadis2012_autoSplit.E2F3.Up	entrezgene	51199	ENSG00000100503	ENSG00000100503	51199	NIN
E2F3	1	Ignatiadis2012_autoSplit.E2F3.Up	entrezgene	51460	ENSG00000163935	ENSG00000163935	51460	SFMBT1
E2F3	1	Ignatiadis2012_autoSplit.E2F3.Up	entrezgene	5151	ENSG00000073417	ENSG00000073417	5151	PDE8A
E2F3	1	Ignatiadis2012_autoSplit.E2F3.Up	entrezgene	51514	ENSG00000143476	ENSG00000143476	51514	DTL
E2F3	1	Ignatiadis2012_autoSplit.E2F3.Up	entrezgene	51517	ENSG00000213672	ENSG00000213672	51517	NCKIPSD
E2F3	1	Ignatiadis2012_autoSplit.E2F3.Up	entrezgene	51523	ENSG00000171604	ENSG00000171604	51523	CXXC5
E2F3	1	Ignatiadis2012_autoSplit.E2F3.Up	entrezgene	51696	ENSG00000112406	ENSG00000112406	51696	HECA
E2F3	1	Ignatiadis2012_autoSplit.E2F3.Up	entrezgene	5209	ENSG00000170525	ENSG00000170525	5209	PFKFB3
E2F3	1	Ignatiadis2012_autoSplit.E2F3.Up	entrezgene	5253	ENSG00000197724	ENSG00000197724	5253	PHF2
E2F3	1	Ignatiadis2012_autoSplit.E2F3.Up	entrezgene	5300	ENSG00000127445	ENSG00000127445	5300	PIN1
E2F3	1	Ignatiadis2012_autoSplit.E2F3.Up	entrezgene	53346	ENSG00000136404	ENSG00000136404	53346	TM6SF1
E2F3	1	Ignatiadis2012_autoSplit.E2F3.Up	entrezgene	53820	ENSG00000183145	ENSG00000183145	53820	DSCR6
E2F3	1	Ignatiadis2012_autoSplit.E2F3.Up	entrezgene	5426	ENSG00000177084	ENSG00000177084	5426	POLE
E2F3	1	Ignatiadis2012_autoSplit.E2F3.Up	entrezgene	5427	ENSG00000100479	ENSG00000100479	5427	POLE2
E2F3	1	Ignatiadis2012_autoSplit.E2F3.Up	entrezgene	54463	ENSG00000154153	ENSG00000154153	54463	FAM134B
E2F3	1	Ignatiadis2012_autoSplit.E2F3.Up	entrezgene	54566	ENSG00000095203	ENSG00000095203	54566	EPB41L4B
E2F3	1	Ignatiadis2012_autoSplit.E2F3.Up	entrezgene	54808	ENSG00000141627	ENSG00000141627	54808	DYM
E2F3	1	Ignatiadis2012_autoSplit.E2F3.Up	entrezgene	54867	ENSG00000119777	ENSG00000119777	54867	TMEM214
E2F3	1	Ignatiadis2012_autoSplit.E2F3.Up	entrezgene	54880	ENSG00000183337	ENSG00000183337	54880	BCOR
E2F3	1	Ignatiadis2012_autoSplit.E2F3.Up	entrezgene	55084	ENSG00000112320	ENSG00000112320	55084	SOBP
E2F3	1	Ignatiadis2012_autoSplit.E2F3.Up	entrezgene	55225	ENSG00000162437	ENSG00000162437	55225	RAVER2
E2F3	1	Ignatiadis2012_autoSplit.E2F3.Up	entrezgene	55274	ENSG00000130024	ENSG00000130024	55274	PHF10
E2F3	1	Ignatiadis2012_autoSplit.E2F3.Up	entrezgene	55450	ENSG00000162545	ENSG00000162545	55450	CAMK2N1
E2F3	1	Ignatiadis2012_autoSplit.E2F3.Up	entrezgene	55540	ENSG00000056736	ENSG00000056736	55540	IL17RB
E2F3	1	Ignatiadis2012_autoSplit.E2F3.Up	entrezgene	55603	ENSG00000112773	ENSG00000112773	55603	FAM46A
E2F3	1	Ignatiadis2012_autoSplit.E2F3.Up	entrezgene	55636	ENSG00000171316	ENSG00000171316	55636	CHD7
E2F3	1	Ignatiadis2012_autoSplit.E2F3.Up	entrezgene	56172	ENSG00000154122	ENSG00000154122	56172	ANKH
E2F3	1	Ignatiadis2012_autoSplit.E2F3.Up	entrezgene	56548	ENSG00000147119	ENSG00000147119	56548	CHST7
E2F3	1	Ignatiadis2012_autoSplit.E2F3.Up	entrezgene	56704	ENSG00000104369	ENSG00000104369	56704	JPH1
E2F3	1	Ignatiadis2012_autoSplit.E2F3.Up	entrezgene	57157	ENSG00000006576	ENSG00000006576	57157	PHTF2
E2F3	1	Ignatiadis2012_autoSplit.E2F3.Up	entrezgene	57531	ENSG00000085382	ENSG00000085382	57531	HACE1
E2F3	1	Ignatiadis2012_autoSplit.E2F3.Up	entrezgene	576	ENSG00000121753	ENSG00000121753	576	BAI2
E2F3	1	Ignatiadis2012_autoSplit.E2F3.Up	entrezgene	5827	ENSG00000176894	ENSG00000176894	5827	PXMP2
E2F3	1	Ignatiadis2012_autoSplit.E2F3.Up	entrezgene	6117	ENSG00000132383	ENSG00000132383	6117	RPA1
E2F3	1	Ignatiadis2012_autoSplit.E2F3.Up	entrezgene	6334	ENSG00000196876	ENSG00000196876	6334	SCN8A
E2F3	1	Ignatiadis2012_autoSplit.E2F3.Up	entrezgene	64097	ENSG00000129595	ENSG00000129595	64097	EPB41L4A
E2F3	1	Ignatiadis2012_autoSplit.E2F3.Up	entrezgene	64130	ENSG00000104863	ENSG00000104863	64130	LIN7B
E2F3	1	Ignatiadis2012_autoSplit.E2F3.Up	entrezgene	6450	ENSG00000185437	ENSG00000185437	6450	SH3BGR
E2F3	1	Ignatiadis2012_autoSplit.E2F3.Up	entrezgene	64858	ENSG00000118655	ENSG00000118655	64858	DCLRE1B
E2F3	1	Ignatiadis2012_autoSplit.E2F3.Up	entrezgene	65055	ENSG00000068615	ENSG00000068615	65055	REEP1
E2F3	1	Ignatiadis2012_autoSplit.E2F3.Up	entrezgene	65078	ENSG00000040608	ENSG00000040608	65078	RTN4R
E2F3	1	Ignatiadis2012_autoSplit.E2F3.Up	entrezgene	6666	ENSG00000177732	ENSG00000177732	6666	SOX12
E2F3	1	Ignatiadis2012_autoSplit.E2F3.Up	entrezgene	6812	ENSG00000136854	ENSG00000136854	6812	STXBP1
E2F3	1	Ignatiadis2012_autoSplit.E2F3.Up	entrezgene	6874	ENSG00000130699	ENSG00000130699	6874	TAF4
E2F3	1	Ignatiadis2012_autoSplit.E2F3.Up	entrezgene	7004	ENSG00000197905	ENSG00000197905	7004	TEAD4
E2F3	1	Ignatiadis2012_autoSplit.E2F3.Up	entrezgene	7027	ENSG00000198176	ENSG00000198176	7027	TFDP1
E2F3	1	Ignatiadis2012_autoSplit.E2F3.Up	entrezgene	7074	ENSG00000156299	ENSG00000156299	7074	TIAM1
E2F3	1	Ignatiadis2012_autoSplit.E2F3.Up	entrezgene	7107	ENSG00000077585	ENSG00000077585	7107	GPR137B
E2F3	1	Ignatiadis2012_autoSplit.E2F3.Up	entrezgene	7368	ENSG00000174607	ENSG00000174607	7368	UGT8
E2F3	1	Ignatiadis2012_autoSplit.E2F3.Up	entrezgene	7474	ENSG00000114251	ENSG00000114251	7474	WNT5A
E2F3	1	Ignatiadis2012_autoSplit.E2F3.Up	entrezgene	79022	ENSG00000134291	ENSG00000134291	79022	TMEM106C
E2F3	1	Ignatiadis2012_autoSplit.E2F3.Up	entrezgene	79056	ENSG00000135378	ENSG00000135378	79056	PRRG4
E2F3	1	Ignatiadis2012_autoSplit.E2F3.Up	entrezgene	7915	ENSG00000112294	ENSG00000112294	7915	ALDH5A1
E2F3	1	Ignatiadis2012_autoSplit.E2F3.Up	entrezgene	79174	ENSG00000184164	ENSG00000184164	79174	CRELD2
E2F3	1	Ignatiadis2012_autoSplit.E2F3.Up	entrezgene	79850	ENSG00000167695	ENSG00000167695	79850	FAM57A
E2F3	1	Ignatiadis2012_autoSplit.E2F3.Up	entrezgene	80318	ENSG00000165113	ENSG00000165113	80318	GKAP1
E2F3	1	Ignatiadis2012_autoSplit.E2F3.Up	entrezgene	81786	ENSG00000146054	ENSG00000146054	81786	TRIM7
E2F3	1	Ignatiadis2012_autoSplit.E2F3.Up	entrezgene	81831	ENSG00000171208	ENSG00000171208	81831	NETO2
E2F3	1	Ignatiadis2012_autoSplit.E2F3.Up	entrezgene	8321	ENSG00000157240	ENSG00000157240	8321	FZD1
E2F3	1	Ignatiadis2012_autoSplit.E2F3.Up	entrezgene	84553	ENSG00000146267	ENSG00000146267	84553	C6orf168
E2F3	1	Ignatiadis2012_autoSplit.E2F3.Up	entrezgene	84634	ENSG00000116014	ENSG00000116014	84634	KISS1R
E2F3	1	Ignatiadis2012_autoSplit.E2F3.Up	entrezgene	84678	ENSG00000089094	ENSG00000089094	84678	KDM2B
E2F3	1	Ignatiadis2012_autoSplit.E2F3.Up	entrezgene	84915	ENSG00000139438	ENSG00000139438	84915	C12orf34
E2F3	1	Ignatiadis2012_autoSplit.E2F3.Up	entrezgene	8534	ENSG00000175264	ENSG00000175264	8534	CHST1
E2F3	1	Ignatiadis2012_autoSplit.E2F3.Up	entrezgene	8604	ENSG00000115840	ENSG00000115840	8604	SLC25A12
E2F3	1	Ignatiadis2012_autoSplit.E2F3.Up	entrezgene	8613	ENSG00000162407	ENSG00000162407	8613	PPAP2B
E2F3	1	Ignatiadis2012_autoSplit.E2F3.Up	entrezgene	864	ENSG00000020633	ENSG00000020633	864	RUNX3
E2F3	1	Ignatiadis2012_autoSplit.E2F3.Up	entrezgene	896	ENSG00000112576	ENSG00000112576	896	CCND3
E2F3	1	Ignatiadis2012_autoSplit.E2F3.Up	entrezgene	898	ENSG00000105173	ENSG00000105173	898	CCNE1
E2F3	1	Ignatiadis2012_autoSplit.E2F3.Up	entrezgene	90355	ENSG00000181751	--	--	--
E2F3	1	Ignatiadis2012_autoSplit.E2F3.Up	entrezgene	9134	ENSG00000175305	ENSG00000175305	9134	CCNE2
E2F3	1	Ignatiadis2012_autoSplit.E2F3.Up	entrezgene	92370	ENSG00000155893	ENSG00000155893	92370	ACPL2
E2F3	1	Ignatiadis2012_autoSplit.E2F3.Up	entrezgene	9308	ENSG00000112149	ENSG00000112149	9308	CD83
E2F3	1	Ignatiadis2012_autoSplit.E2F3.Up	entrezgene	9368	ENSG00000109062	ENSG00000109062	9368	SLC9A3R1
E2F3	1	Ignatiadis2012_autoSplit.E2F3.Up	entrezgene	9401	ENSG00000160957	--	--	--
E2F3	1	Ignatiadis2012_autoSplit.E2F3.Up	entrezgene	94234	ENSG00000164379	ENSG00000164379	94234	FOXQ1
E2F3	1	Ignatiadis2012_autoSplit.E2F3.Up	entrezgene	9429	ENSG00000118777	ENSG00000118777	9429	ABCG2
E2F3	1	Ignatiadis2012_autoSplit.E2F3.Up	entrezgene	9435	ENSG00000175040	ENSG00000175040	9435	CHST2
E2F3	1	Ignatiadis2012_autoSplit.E2F3.Up	entrezgene	9631	ENSG00000113569	ENSG00000113569	9631	NUP155
E2F3	1	Ignatiadis2012_autoSplit.E2F3.Up	entrezgene	9738	ENSG00000103540	ENSG00000103540	9738	CP110
E2F3	-1	Ignatiadis2012_autoSplit.E2F3.Down	entrezgene	10208	ENSG00000132952	ENSG00000132952	10208	USPL1
E2F3	-1	Ignatiadis2012_autoSplit.E2F3.Down	entrezgene	11137	ENSG00000136045	ENSG00000136045	11137	PWP1
E2F3	-1	Ignatiadis2012_autoSplit.E2F3.Down	entrezgene	112724	ENSG00000160439	--	--	--
E2F3	-1	Ignatiadis2012_autoSplit.E2F3.Down	entrezgene	125476	ENSG00000153391	ENSG00000153391	125476	INO80C
E2F3	-1	Ignatiadis2012_autoSplit.E2F3.Down	entrezgene	1609	ENSG00000145214	ENSG00000145214	1609	DGKQ
E2F3	-1	Ignatiadis2012_autoSplit.E2F3.Down	entrezgene	1969	ENSG00000142627	ENSG00000142627	1969	EPHA2
E2F3	-1	Ignatiadis2012_autoSplit.E2F3.Down	entrezgene	23030	ENSG00000127663	ENSG00000127663	23030	KDM4B
E2F3	-1	Ignatiadis2012_autoSplit.E2F3.Down	entrezgene	23309	ENSG00000127511	ENSG00000127511	23309	KIAA0700
E2F3	-1	Ignatiadis2012_autoSplit.E2F3.Down	entrezgene	26151	ENSG00000109065	ENSG00000109065	26151	NAT9
E2F3	-1	Ignatiadis2012_autoSplit.E2F3.Down	entrezgene	3553	ENSG00000125538	ENSG00000125538	3553	IL1B
E2F3	-1	Ignatiadis2012_autoSplit.E2F3.Down	entrezgene	55612	ENSG00000101311	ENSG00000101311	55612	FERMT1
E2F3	-1	Ignatiadis2012_autoSplit.E2F3.Down	entrezgene	5742	ENSG00000095303	ENSG00000095303	5742	PTGS1
E2F3	-1	Ignatiadis2012_autoSplit.E2F3.Down	entrezgene	58517	ENSG00000119707	ENSG00000119707	58517	RBM25
E2F3	-1	Ignatiadis2012_autoSplit.E2F3.Down	entrezgene	6337	ENSG00000111319	ENSG00000111319	6337	SCNN1A
E2F3	-1	Ignatiadis2012_autoSplit.E2F3.Down	entrezgene	6431	ENSG00000124193	ENSG00000124193	6431	SRSF6
E2F3	-1	Ignatiadis2012_autoSplit.E2F3.Down	entrezgene	6720	ENSG00000072310	ENSG00000072310	6720	SREBF1
E2F3	-1	Ignatiadis2012_autoSplit.E2F3.Down	entrezgene	7128	ENSG00000118503	ENSG00000118503	7128	TNFAIP3
E2F3	-1	Ignatiadis2012_autoSplit.E2F3.Down	entrezgene	7748	ENSG00000005801	ENSG00000005801	7748	ZNF195
E2F3	-1	Ignatiadis2012_autoSplit.E2F3.Down	entrezgene	79101	ENSG00000166012	ENSG00000166012	79101	TAF1D
E2F3	-1	Ignatiadis2012_autoSplit.E2F3.Down	entrezgene	89845	ENSG00000124574	ENSG00000124574	89845	ABCC10
E2F3	-1	Ignatiadis2012_autoSplit.E2F3.Down	entrezgene	9147	ENSG00000165525	ENSG00000165525	9147	NEMF
E2F3	-1	Ignatiadis2012_autoSplit.E2F3.Down	entrezgene	9933	ENSG00000080608	ENSG00000080608	9933	KIAA0020
GENE70	1	Ignatiadis2012_autoSplit.GENE70.Up	entrezgene	10403	ENSG00000080986	ENSG00000080986	10403	NDC80
GENE70	1	Ignatiadis2012_autoSplit.GENE70.Up	entrezgene	10531	ENSG00000107959	ENSG00000107959	10531	PITRM1
GENE70	1	Ignatiadis2012_autoSplit.GENE70.Up	entrezgene	1058	ENSG00000115163	ENSG00000115163	1058	CENPA
GENE70	1	Ignatiadis2012_autoSplit.GENE70.Up	entrezgene	10874	ENSG00000109255	ENSG00000109255	10874	NMU
GENE70	1	Ignatiadis2012_autoSplit.GENE70.Up	entrezgene	1284	ENSG00000134871	ENSG00000134871	1284	COL4A2
GENE70	1	Ignatiadis2012_autoSplit.GENE70.Up	entrezgene	160897	ENSG00000152749	ENSG00000152749	160897	GPR180
GENE70	1	Ignatiadis2012_autoSplit.GENE70.Up	entrezgene	1633	ENSG00000156136	ENSG00000156136	1633	DCK
GENE70	1	Ignatiadis2012_autoSplit.GENE70.Up	entrezgene	169714	ENSG00000165661	--	--	--
GENE70	1	Ignatiadis2012_autoSplit.GENE70.Up	entrezgene	1894	ENSG00000114346	ENSG00000114346	1894	ECT2
GENE70	1	Ignatiadis2012_autoSplit.GENE70.Up	entrezgene	2131	ENSG00000182197	ENSG00000182197	2131	EXT1
GENE70	1	Ignatiadis2012_autoSplit.GENE70.Up	entrezgene	23594	ENSG00000091651	ENSG00000091651	23594	ORC6
GENE70	1	Ignatiadis2012_autoSplit.GENE70.Up	entrezgene	2781	ENSG00000128266	ENSG00000128266	2781	GNAZ
GENE70	1	Ignatiadis2012_autoSplit.GENE70.Up	entrezgene	3488	ENSG00000115461	ENSG00000115461	3488	IGFBP5
GENE70	1	Ignatiadis2012_autoSplit.GENE70.Up	entrezgene	4175	ENSG00000076003	ENSG00000076003	4175	MCM6
GENE70	1	Ignatiadis2012_autoSplit.GENE70.Up	entrezgene	4318	ENSG00000100985	ENSG00000100985	4318	MMP9
GENE70	1	Ignatiadis2012_autoSplit.GENE70.Up	entrezgene	5019	ENSG00000083720	ENSG00000083720	5019	OXCT1
GENE70	1	Ignatiadis2012_autoSplit.GENE70.Up	entrezgene	51203	ENSG00000137804	ENSG00000137804	51203	NUSAP1
GENE70	1	Ignatiadis2012_autoSplit.GENE70.Up	entrezgene	51377	ENSG00000116750	ENSG00000116750	51377	UCHL5
GENE70	1	Ignatiadis2012_autoSplit.GENE70.Up	entrezgene	51514	ENSG00000143476	ENSG00000143476	51514	DTL
GENE70	1	Ignatiadis2012_autoSplit.GENE70.Up	entrezgene	51560	ENSG00000154917	ENSG00000154917	51560	RAB6A
GENE70	1	Ignatiadis2012_autoSplit.GENE70.Up	entrezgene	55321	ENSG00000125895	ENSG00000125895	55321	C20orf46
GENE70	1	Ignatiadis2012_autoSplit.GENE70.Up	entrezgene	56942	ENSG00000103121	ENSG00000103121	56942	C16orf61
GENE70	1	Ignatiadis2012_autoSplit.GENE70.Up	entrezgene	57110	ENSG00000127252	ENSG00000127252	57110	HRASLS
GENE70	1	Ignatiadis2012_autoSplit.GENE70.Up	entrezgene	57211	ENSG00000112414	ENSG00000112414	57211	GPR126
GENE70	1	Ignatiadis2012_autoSplit.GENE70.Up	entrezgene	5984	ENSG00000163918	ENSG00000163918	5984	RFC4
GENE70	1	Ignatiadis2012_autoSplit.GENE70.Up	entrezgene	6515	ENSG00000059804	ENSG00000059804	6515	SLC2A3
GENE70	1	Ignatiadis2012_autoSplit.GENE70.Up	entrezgene	79888	ENSG00000153395	ENSG00000153395	79888	LPCAT1
GENE70	1	Ignatiadis2012_autoSplit.GENE70.Up	entrezgene	81624	ENSG00000139734	ENSG00000139734	81624	DIAPH3
GENE70	1	Ignatiadis2012_autoSplit.GENE70.Up	entrezgene	83879	ENSG00000144354	ENSG00000144354	83879	CDCA7
GENE70	1	Ignatiadis2012_autoSplit.GENE70.Up	entrezgene	8476	ENSG00000143776	ENSG00000143776	8476	CDC42BPA
GENE70	1	Ignatiadis2012_autoSplit.GENE70.Up	entrezgene	85453	ENSG00000180543	ENSG00000180543	85453	TSPYL5
GENE70	1	Ignatiadis2012_autoSplit.GENE70.Up	entrezgene	8833	ENSG00000163655	ENSG00000163655	8833	GMPS
GENE70	1	Ignatiadis2012_autoSplit.GENE70.Up	entrezgene	9055	ENSG00000198901	ENSG00000198901	9055	PRC1
GENE70	1	Ignatiadis2012_autoSplit.GENE70.Up	entrezgene	91283	ENSG00000066697	ENSG00000066697	91283	C9orf30
GENE70	1	Ignatiadis2012_autoSplit.GENE70.Up	entrezgene	9134	ENSG00000175305	ENSG00000175305	9134	CCNE2
GENE70	1	Ignatiadis2012_autoSplit.GENE70.Up	entrezgene	92140	ENSG00000147649	ENSG00000147649	92140	MTDH
GENE70	1	Ignatiadis2012_autoSplit.GENE70.Up	entrezgene	9833	ENSG00000165304	ENSG00000165304	9833	MELK
GENE70	-1	Ignatiadis2012_autoSplit.GENE70.Down	entrezgene	10455	ENSG00000198721	ENSG00000198721	10455	ECI2
GENE70	-1	Ignatiadis2012_autoSplit.GENE70.Down	entrezgene	146760	ENSG00000185924	ENSG00000185924	146760	RTN4RL1
GENE70	-1	Ignatiadis2012_autoSplit.GENE70.Down	entrezgene	146923	ENSG00000198863	ENSG00000198863	146923	RUNDC1
GENE70	-1	Ignatiadis2012_autoSplit.GENE70.Down	entrezgene	151126	ENSG00000144331	ENSG00000144331	151126	ZNF385B
GENE70	-1	Ignatiadis2012_autoSplit.GENE70.Down	entrezgene	163	ENSG00000006125	ENSG00000006125	163	AP2B1
GENE70	-1	Ignatiadis2012_autoSplit.GENE70.Down	entrezgene	27113	ENSG00000105327	ENSG00000105327	27113	BBC3
GENE70	-1	Ignatiadis2012_autoSplit.GENE70.Down	entrezgene	2947	ENSG00000134202	ENSG00000134202	2947	GSTM3
GENE70	-1	Ignatiadis2012_autoSplit.GENE70.Down	entrezgene	55351	ENSG00000152953	ENSG00000152953	55351	STK32B
GENE70	-1	Ignatiadis2012_autoSplit.GENE70.Down	entrezgene	57758	ENSG00000175356	ENSG00000175356	57758	SCUBE2
GENE70	-1	Ignatiadis2012_autoSplit.GENE70.Down	entrezgene	58475	ENSG00000166927	ENSG00000166927	58475	MS4A7
GENE70	-1	Ignatiadis2012_autoSplit.GENE70.Down	entrezgene	7043	ENSG00000119699	ENSG00000119699	7043	TGFB3
GENE70	-1	Ignatiadis2012_autoSplit.GENE70.Down	entrezgene	79132	ENSG00000108771	--	--	--
GENE70	-1	Ignatiadis2012_autoSplit.GENE70.Down	entrezgene	8659	ENSG00000159423	ENSG00000159423	8659	ALDH4A1
GENE70	-1	Ignatiadis2012_autoSplit.GENE70.Down	entrezgene	8817	ENSG00000156427	ENSG00000156427	8817	FGF18
GENE70	-1	Ignatiadis2012_autoSplit.GENE70.Down	entrezgene	8840	ENSG00000104415	ENSG00000104415	8840	WISP1
IGF1	1	Ignatiadis2012_autoSplit.IGF1.Up	entrezgene	10038	ENSG00000129484	ENSG00000129484	10038	PARP2
IGF1	1	Ignatiadis2012_autoSplit.IGF1.Up	entrezgene	10061	ENSG00000033050	ENSG00000033050	10061	ABCF2
IGF1	1	Ignatiadis2012_autoSplit.IGF1.Up	entrezgene	10105	ENSG00000108179	ENSG00000108179	10105	PPIF
IGF1	1	Ignatiadis2012_autoSplit.IGF1.Up	entrezgene	10184	ENSG00000145685	ENSG00000145685	10184	LHFPL2
IGF1	1	Ignatiadis2012_autoSplit.IGF1.Up	entrezgene	1026	ENSG00000124762	ENSG00000124762	1026	CDKN1A
IGF1	1	Ignatiadis2012_autoSplit.IGF1.Up	entrezgene	10273	ENSG00000103266	ENSG00000103266	10273	STUB1
IGF1	1	Ignatiadis2012_autoSplit.IGF1.Up	entrezgene	10425	ENSG00000177479	ENSG00000177479	10425	ARIH2
IGF1	1	Ignatiadis2012_autoSplit.IGF1.Up	entrezgene	10452	ENSG00000130204	ENSG00000130204	10452	TOMM40
IGF1	1	Ignatiadis2012_autoSplit.IGF1.Up	entrezgene	10469	ENSG00000104980	ENSG00000104980	10469	TIMM44
IGF1	1	Ignatiadis2012_autoSplit.IGF1.Up	entrezgene	1051	ENSG00000172216	ENSG00000172216	1051	CEBPB
IGF1	1	Ignatiadis2012_autoSplit.IGF1.Up	entrezgene	10528	ENSG00000101361	ENSG00000101361	10528	NOP56
IGF1	1	Ignatiadis2012_autoSplit.IGF1.Up	entrezgene	1054	ENSG00000153879	ENSG00000153879	1054	CEBPG
IGF1	1	Ignatiadis2012_autoSplit.IGF1.Up	entrezgene	10573	ENSG00000086504	ENSG00000086504	10573	MRPL28
IGF1	1	Ignatiadis2012_autoSplit.IGF1.Up	entrezgene	10644	ENSG00000073792	ENSG00000073792	10644	IGF2BP2
IGF1	1	Ignatiadis2012_autoSplit.IGF1.Up	entrezgene	1075	ENSG00000109861	ENSG00000109861	1075	CTSC
IGF1	1	Ignatiadis2012_autoSplit.IGF1.Up	entrezgene	10807	ENSG00000165689	ENSG00000165689	10807	SDCCAG3
IGF1	1	Ignatiadis2012_autoSplit.IGF1.Up	entrezgene	10808	ENSG00000120694	ENSG00000120694	10808	HSPH1
IGF1	1	Ignatiadis2012_autoSplit.IGF1.Up	entrezgene	10897	ENSG00000174851	ENSG00000174851	10897	YIF1A
IGF1	1	Ignatiadis2012_autoSplit.IGF1.Up	entrezgene	10926	ENSG00000006634	ENSG00000006634	10926	DBF4
IGF1	1	Ignatiadis2012_autoSplit.IGF1.Up	entrezgene	10950	ENSG00000154640	ENSG00000154640	10950	BTG3
IGF1	1	Ignatiadis2012_autoSplit.IGF1.Up	entrezgene	10962	ENSG00000213190	ENSG00000213190	10962	MLLT11
IGF1	1	Ignatiadis2012_autoSplit.IGF1.Up	entrezgene	10963	ENSG00000168439	ENSG00000168439	10963	STIP1
IGF1	1	Ignatiadis2012_autoSplit.IGF1.Up	entrezgene	11033	ENSG00000105963	ENSG00000105963	11033	ADAP1
IGF1	1	Ignatiadis2012_autoSplit.IGF1.Up	entrezgene	11047	ENSG00000130706	ENSG00000130706	11047	ADRM1
IGF1	1	Ignatiadis2012_autoSplit.IGF1.Up	entrezgene	11151	ENSG00000102879	ENSG00000102879	11151	CORO1A
IGF1	1	Ignatiadis2012_autoSplit.IGF1.Up	entrezgene	11187	ENSG00000184363	ENSG00000184363	11187	PKP3
IGF1	1	Ignatiadis2012_autoSplit.IGF1.Up	entrezgene	112398	ENSG00000269858	--	--	--
IGF1	1	Ignatiadis2012_autoSplit.IGF1.Up	entrezgene	11247	ENSG00000182379	ENSG00000182379	11247	NXPH4
IGF1	1	Ignatiadis2012_autoSplit.IGF1.Up	entrezgene	11260	ENSG00000184575	ENSG00000184575	11260	XPOT
IGF1	1	Ignatiadis2012_autoSplit.IGF1.Up	entrezgene	11266	ENSG00000081721	ENSG00000081721	11266	DUSP12
IGF1	1	Ignatiadis2012_autoSplit.IGF1.Up	entrezgene	11322	ENSG00000141524	ENSG00000141524	11322	TMC6
IGF1	1	Ignatiadis2012_autoSplit.IGF1.Up	entrezgene	11332	ENSG00000097021	ENSG00000097021	11332	ACOT7
IGF1	1	Ignatiadis2012_autoSplit.IGF1.Up	entrezgene	11340	ENSG00000120699	ENSG00000120699	11340	EXOSC8
IGF1	1	Ignatiadis2012_autoSplit.IGF1.Up	entrezgene	1147	ENSG00000213341	ENSG00000213341	1147	CHUK
IGF1	1	Ignatiadis2012_autoSplit.IGF1.Up	entrezgene	1152	ENSG00000166165	ENSG00000166165	1152	CKB
IGF1	1	Ignatiadis2012_autoSplit.IGF1.Up	entrezgene	115201	ENSG00000101844	ENSG00000101844	115201	ATG4A
IGF1	1	Ignatiadis2012_autoSplit.IGF1.Up	entrezgene	116496	ENSG00000135842	ENSG00000135842	116496	FAM129A
IGF1	1	Ignatiadis2012_autoSplit.IGF1.Up	entrezgene	116832	ENSG00000163923	ENSG00000163923	116832	RPL39L
IGF1	1	Ignatiadis2012_autoSplit.IGF1.Up	entrezgene	1175	ENSG00000042753	ENSG00000042753	1175	AP2S1
IGF1	1	Ignatiadis2012_autoSplit.IGF1.Up	entrezgene	1317	ENSG00000136868	ENSG00000136868	1317	SLC31A1
IGF1	1	Ignatiadis2012_autoSplit.IGF1.Up	entrezgene	1465	ENSG00000159176	ENSG00000159176	1465	CSRP1
IGF1	1	Ignatiadis2012_autoSplit.IGF1.Up	entrezgene	1468	ENSG00000183048	ENSG00000183048	1468	SLC25A10
IGF1	1	Ignatiadis2012_autoSplit.IGF1.Up	entrezgene	1503	ENSG00000171793	--	--	--
IGF1	1	Ignatiadis2012_autoSplit.IGF1.Up	entrezgene	1515	ENSG00000136943	ENSG00000136943	1515	CTSL2
IGF1	1	Ignatiadis2012_autoSplit.IGF1.Up	entrezgene	1534	ENSG00000008283	ENSG00000008283	1534	CYB561
IGF1	1	Ignatiadis2012_autoSplit.IGF1.Up	entrezgene	1537	ENSG00000179091	ENSG00000179091	1537	CYC1
IGF1	1	Ignatiadis2012_autoSplit.IGF1.Up	entrezgene	156	ENSG00000173020	ENSG00000173020	156	ADRBK1
IGF1	1	Ignatiadis2012_autoSplit.IGF1.Up	entrezgene	1594	ENSG00000111012	ENSG00000111012	1594	CYP27B1
IGF1	1	Ignatiadis2012_autoSplit.IGF1.Up	entrezgene	16	ENSG00000090861	ENSG00000090861	16	AARS
IGF1	1	Ignatiadis2012_autoSplit.IGF1.Up	entrezgene	1622	ENSG00000155368	ENSG00000155368	1622	DBI
IGF1	1	Ignatiadis2012_autoSplit.IGF1.Up	entrezgene	1717	ENSG00000172893	ENSG00000172893	1717	DHCR7
IGF1	1	Ignatiadis2012_autoSplit.IGF1.Up	entrezgene	1743	ENSG00000119689	ENSG00000119689	1743	DLST
IGF1	1	Ignatiadis2012_autoSplit.IGF1.Up	entrezgene	1758	ENSG00000152592	--	--	--
IGF1	1	Ignatiadis2012_autoSplit.IGF1.Up	entrezgene	1789	ENSG00000088305	ENSG00000088305	1789	DNMT3B
IGF1	1	Ignatiadis2012_autoSplit.IGF1.Up	entrezgene	1837	ENSG00000134769	ENSG00000134769	1837	DTNA
IGF1	1	Ignatiadis2012_autoSplit.IGF1.Up	entrezgene	1847	ENSG00000138166	ENSG00000138166	1847	DUSP5
IGF1	1	Ignatiadis2012_autoSplit.IGF1.Up	entrezgene	1848	ENSG00000139318	ENSG00000139318	1848	DUSP6
IGF1	1	Ignatiadis2012_autoSplit.IGF1.Up	entrezgene	1850	ENSG00000184545	ENSG00000184545	1850	DUSP8
IGF1	1	Ignatiadis2012_autoSplit.IGF1.Up	entrezgene	1857	ENSG00000161202	ENSG00000161202	1857	DVL3
IGF1	1	Ignatiadis2012_autoSplit.IGF1.Up	entrezgene	192286	ENSG00000146066	ENSG00000146066	192286	HIGD2A
IGF1	1	Ignatiadis2012_autoSplit.IGF1.Up	entrezgene	1960	ENSG00000179388	ENSG00000179388	1960	EGR3
IGF1	1	Ignatiadis2012_autoSplit.IGF1.Up	entrezgene	1965	ENSG00000134001	ENSG00000134001	1965	EIF2S1
IGF1	1	Ignatiadis2012_autoSplit.IGF1.Up	entrezgene	1978	ENSG00000187840	ENSG00000187840	1978	EIF4EBP1
IGF1	1	Ignatiadis2012_autoSplit.IGF1.Up	entrezgene	2021	ENSG00000167136	ENSG00000167136	2021	ENDOG
IGF1	1	Ignatiadis2012_autoSplit.IGF1.Up	entrezgene	2030	ENSG00000112759	ENSG00000112759	2030	SLC29A1
IGF1	1	Ignatiadis2012_autoSplit.IGF1.Up	entrezgene	203068	ENSG00000196230	--	--	--
IGF1	1	Ignatiadis2012_autoSplit.IGF1.Up	entrezgene	2055	ENSG00000182372	ENSG00000182372	2055	CLN8
IGF1	1	Ignatiadis2012_autoSplit.IGF1.Up	entrezgene	2119	ENSG00000244405	ENSG00000244405	2119	ETV5
IGF1	1	Ignatiadis2012_autoSplit.IGF1.Up	entrezgene	2146	ENSG00000106462	ENSG00000106462	2146	EZH2
IGF1	1	Ignatiadis2012_autoSplit.IGF1.Up	entrezgene	2161	ENSG00000131187	ENSG00000131187	2161	F12
IGF1	1	Ignatiadis2012_autoSplit.IGF1.Up	entrezgene	2184	ENSG00000103876	ENSG00000103876	2184	FAH
IGF1	1	Ignatiadis2012_autoSplit.IGF1.Up	entrezgene	2222	ENSG00000079459	ENSG00000079459	2222	FDFT1
IGF1	1	Ignatiadis2012_autoSplit.IGF1.Up	entrezgene	2224	ENSG00000160752	--	--	--
IGF1	1	Ignatiadis2012_autoSplit.IGF1.Up	entrezgene	226	ENSG00000149925	ENSG00000149925	226	ALDOA
IGF1	1	Ignatiadis2012_autoSplit.IGF1.Up	entrezgene	2274	ENSG00000115641	ENSG00000115641	2274	FHL2
IGF1	1	Ignatiadis2012_autoSplit.IGF1.Up	entrezgene	22843	ENSG00000175175	ENSG00000175175	22843	PPM1E
IGF1	1	Ignatiadis2012_autoSplit.IGF1.Up	entrezgene	22906	ENSG00000182606	ENSG00000182606	22906	TRAK1
IGF1	1	Ignatiadis2012_autoSplit.IGF1.Up	entrezgene	22913	ENSG00000125970	ENSG00000125970	22913	RALY
IGF1	1	Ignatiadis2012_autoSplit.IGF1.Up	entrezgene	23043	ENSG00000154310	ENSG00000154310	23043	TNIK
IGF1	1	Ignatiadis2012_autoSplit.IGF1.Up	entrezgene	2316	ENSG00000196924	ENSG00000196924	2316	FLNA
IGF1	1	Ignatiadis2012_autoSplit.IGF1.Up	entrezgene	23165	ENSG00000155561	ENSG00000155561	23165	NUP205
IGF1	1	Ignatiadis2012_autoSplit.IGF1.Up	entrezgene	23234	ENSG00000213551	ENSG00000213551	23234	DNAJC9
IGF1	1	Ignatiadis2012_autoSplit.IGF1.Up	entrezgene	23381	ENSG00000198952	ENSG00000198952	23381	SMG5
IGF1	1	Ignatiadis2012_autoSplit.IGF1.Up	entrezgene	23516	ENSG00000104635	ENSG00000104635	23516	SLC39A14
IGF1	1	Ignatiadis2012_autoSplit.IGF1.Up	entrezgene	23555	ENSG00000099282	ENSG00000099282	23555	TSPAN15
IGF1	1	Ignatiadis2012_autoSplit.IGF1.Up	entrezgene	2356	ENSG00000136877	ENSG00000136877	2356	FPGS
IGF1	1	Ignatiadis2012_autoSplit.IGF1.Up	entrezgene	23590	ENSG00000148459	ENSG00000148459	23590	PDSS1
IGF1	1	Ignatiadis2012_autoSplit.IGF1.Up	entrezgene	23594	ENSG00000091651	ENSG00000091651	23594	ORC6
IGF1	1	Ignatiadis2012_autoSplit.IGF1.Up	entrezgene	23649	ENSG00000014138	ENSG00000014138	23649	POLA2
IGF1	1	Ignatiadis2012_autoSplit.IGF1.Up	entrezgene	23657	ENSG00000151012	ENSG00000151012	23657	SLC7A11
IGF1	1	Ignatiadis2012_autoSplit.IGF1.Up	entrezgene	246243	ENSG00000171865	ENSG00000171865	246243	RNASEH1
IGF1	1	Ignatiadis2012_autoSplit.IGF1.Up	entrezgene	2539	ENSG00000160211	ENSG00000160211	2539	G6PD
IGF1	1	Ignatiadis2012_autoSplit.IGF1.Up	entrezgene	2553	ENSG00000104064	ENSG00000104064	2553	GABPB1
IGF1	1	Ignatiadis2012_autoSplit.IGF1.Up	entrezgene	2582	ENSG00000117308	ENSG00000117308	2582	GALE
IGF1	1	Ignatiadis2012_autoSplit.IGF1.Up	entrezgene	25888	ENSG00000142528	ENSG00000142528	25888	ZNF473
IGF1	1	Ignatiadis2012_autoSplit.IGF1.Up	entrezgene	26155	ENSG00000188976	ENSG00000188976	26155	NOC2L
IGF1	1	Ignatiadis2012_autoSplit.IGF1.Up	entrezgene	26168	ENSG00000161956	ENSG00000161956	26168	SENP3
IGF1	1	Ignatiadis2012_autoSplit.IGF1.Up	entrezgene	2617	ENSG00000106105	ENSG00000106105	2617	GARS
IGF1	1	Ignatiadis2012_autoSplit.IGF1.Up	entrezgene	2618	ENSG00000159131	--	--	--
IGF1	1	Ignatiadis2012_autoSplit.IGF1.Up	entrezgene	26227	ENSG00000092621	ENSG00000092621	26227	PHGDH
IGF1	1	Ignatiadis2012_autoSplit.IGF1.Up	entrezgene	26271	ENSG00000112029	ENSG00000112029	26271	FBXO5
IGF1	1	Ignatiadis2012_autoSplit.IGF1.Up	entrezgene	2644	ENSG00000137880	ENSG00000137880	2644	GCHFR
IGF1	1	Ignatiadis2012_autoSplit.IGF1.Up	entrezgene	26471	ENSG00000176046	ENSG00000176046	26471	NUPR1
IGF1	1	Ignatiadis2012_autoSplit.IGF1.Up	entrezgene	26472	ENSG00000173457	ENSG00000173457	26472	PPP1R14B
IGF1	1	Ignatiadis2012_autoSplit.IGF1.Up	entrezgene	26521	ENSG00000150779	ENSG00000150779	26521	TIMM8B
IGF1	1	Ignatiadis2012_autoSplit.IGF1.Up	entrezgene	26973	ENSG00000110172	ENSG00000110172	26973	CHORDC1
IGF1	1	Ignatiadis2012_autoSplit.IGF1.Up	entrezgene	27341	ENSG00000189306	ENSG00000189306	27341	RRP7A
IGF1	1	Ignatiadis2012_autoSplit.IGF1.Up	entrezgene	2810	ENSG00000175793	ENSG00000175793	2810	SFN
IGF1	1	Ignatiadis2012_autoSplit.IGF1.Up	entrezgene	28231	ENSG00000101187	ENSG00000101187	28231	SLCO4A1
IGF1	1	Ignatiadis2012_autoSplit.IGF1.Up	entrezgene	28960	ENSG00000110063	ENSG00000110063	28960	DCPS
IGF1	1	Ignatiadis2012_autoSplit.IGF1.Up	entrezgene	29107	ENSG00000132661	ENSG00000132661	29107	NXT1
IGF1	1	Ignatiadis2012_autoSplit.IGF1.Up	entrezgene	29763	ENSG00000165912	ENSG00000165912	29763	PACSIN3
IGF1	1	Ignatiadis2012_autoSplit.IGF1.Up	entrezgene	29893	ENSG00000131470	ENSG00000131470	29893	PSMC3IP
IGF1	1	Ignatiadis2012_autoSplit.IGF1.Up	entrezgene	29901	ENSG00000168061	ENSG00000168061	29901	SAC3D1
IGF1	1	Ignatiadis2012_autoSplit.IGF1.Up	entrezgene	29915	ENSG00000111727	ENSG00000111727	29915	HCFC2
IGF1	1	Ignatiadis2012_autoSplit.IGF1.Up	entrezgene	29960	ENSG00000122687	ENSG00000122687	29960	FTSJ2
IGF1	1	Ignatiadis2012_autoSplit.IGF1.Up	entrezgene	3015	ENSG00000164032	ENSG00000164032	3015	H2AFZ
IGF1	1	Ignatiadis2012_autoSplit.IGF1.Up	entrezgene	3035	ENSG00000170445	ENSG00000170445	3035	HARS
IGF1	1	Ignatiadis2012_autoSplit.IGF1.Up	entrezgene	3145	ENSG00000256269	--	--	--
IGF1	1	Ignatiadis2012_autoSplit.IGF1.Up	entrezgene	3163	ENSG00000103415	ENSG00000103415	3163	HMOX2
IGF1	1	Ignatiadis2012_autoSplit.IGF1.Up	entrezgene	3241	ENSG00000115756	ENSG00000115756	3241	HPCAL1
IGF1	1	Ignatiadis2012_autoSplit.IGF1.Up	entrezgene	3251	ENSG00000165704	ENSG00000165704	3251	HPRT1
IGF1	1	Ignatiadis2012_autoSplit.IGF1.Up	entrezgene	3376	ENSG00000196305	ENSG00000196305	3376	IARS
IGF1	1	Ignatiadis2012_autoSplit.IGF1.Up	entrezgene	3396	ENSG00000167862	ENSG00000167862	3396	ICT1
IGF1	1	Ignatiadis2012_autoSplit.IGF1.Up	entrezgene	3422	ENSG00000067064	ENSG00000067064	3422	IDI1
IGF1	1	Ignatiadis2012_autoSplit.IGF1.Up	entrezgene	3475	ENSG00000006652	ENSG00000006652	3475	IFRD1
IGF1	1	Ignatiadis2012_autoSplit.IGF1.Up	entrezgene	353189	ENSG00000173930	ENSG00000173930	353189	SLCO4C1
IGF1	1	Ignatiadis2012_autoSplit.IGF1.Up	entrezgene	3556	ENSG00000196083	ENSG00000196083	3556	IL1RAP
IGF1	1	Ignatiadis2012_autoSplit.IGF1.Up	entrezgene	3638	ENSG00000186480	ENSG00000186480	3638	INSIG1
IGF1	1	Ignatiadis2012_autoSplit.IGF1.Up	entrezgene	3654	ENSG00000184216	ENSG00000184216	3654	IRAK1
IGF1	1	Ignatiadis2012_autoSplit.IGF1.Up	entrezgene	3661	ENSG00000126456	ENSG00000126456	3661	IRF3
IGF1	1	Ignatiadis2012_autoSplit.IGF1.Up	entrezgene	3682	ENSG00000083457	ENSG00000083457	3682	ITGAE
IGF1	1	Ignatiadis2012_autoSplit.IGF1.Up	entrezgene	3730	ENSG00000011201	ENSG00000011201	3730	KAL1
IGF1	1	Ignatiadis2012_autoSplit.IGF1.Up	entrezgene	3831	ENSG00000126214	--	--	--
IGF1	1	Ignatiadis2012_autoSplit.IGF1.Up	entrezgene	3836	ENSG00000114030	ENSG00000114030	3836	KPNA1
IGF1	1	Ignatiadis2012_autoSplit.IGF1.Up	entrezgene	3898	ENSG00000159166	ENSG00000159166	3898	LAD1
IGF1	1	Ignatiadis2012_autoSplit.IGF1.Up	entrezgene	3949	ENSG00000130164	ENSG00000130164	3949	LDLR
IGF1	1	Ignatiadis2012_autoSplit.IGF1.Up	entrezgene	3992	ENSG00000149485	ENSG00000149485	3992	FADS1
IGF1	1	Ignatiadis2012_autoSplit.IGF1.Up	entrezgene	3995	ENSG00000221968	ENSG00000221968	3995	FADS3
IGF1	1	Ignatiadis2012_autoSplit.IGF1.Up	entrezgene	4016	ENSG00000129038	ENSG00000129038	4016	LOXL1
IGF1	1	Ignatiadis2012_autoSplit.IGF1.Up	entrezgene	4017	ENSG00000134013	ENSG00000134013	4017	LOXL2
IGF1	1	Ignatiadis2012_autoSplit.IGF1.Up	entrezgene	4256	ENSG00000111341	ENSG00000111341	4256	MGP
IGF1	1	Ignatiadis2012_autoSplit.IGF1.Up	entrezgene	4319	ENSG00000166670	ENSG00000166670	4319	MMP10
IGF1	1	Ignatiadis2012_autoSplit.IGF1.Up	entrezgene	440	ENSG00000070669	ENSG00000070669	440	ASNS
IGF1	1	Ignatiadis2012_autoSplit.IGF1.Up	entrezgene	444	ENSG00000198363	ENSG00000198363	444	ASPH
IGF1	1	Ignatiadis2012_autoSplit.IGF1.Up	entrezgene	4552	ENSG00000124275	ENSG00000124275	4552	MTRR
IGF1	1	Ignatiadis2012_autoSplit.IGF1.Up	entrezgene	4597	ENSG00000167508	ENSG00000167508	4597	MVD
IGF1	1	Ignatiadis2012_autoSplit.IGF1.Up	entrezgene	4605	ENSG00000101057	--	--	--
IGF1	1	Ignatiadis2012_autoSplit.IGF1.Up	entrezgene	47	ENSG00000131473	--	--	--
IGF1	1	Ignatiadis2012_autoSplit.IGF1.Up	entrezgene	4728	ENSG00000110717	ENSG00000110717	4728	NDUFS8
IGF1	1	Ignatiadis2012_autoSplit.IGF1.Up	entrezgene	4860	ENSG00000198805	ENSG00000198805	4860	PNP
IGF1	1	Ignatiadis2012_autoSplit.IGF1.Up	entrezgene	4900	ENSG00000154146	ENSG00000154146	4900	NRGN
IGF1	1	Ignatiadis2012_autoSplit.IGF1.Up	entrezgene	5029	ENSG00000175591	ENSG00000175591	5029	P2RY2
IGF1	1	Ignatiadis2012_autoSplit.IGF1.Up	entrezgene	51016	ENSG00000100908	ENSG00000100908	51016	FAM158A
IGF1	1	Ignatiadis2012_autoSplit.IGF1.Up	entrezgene	51018	ENSG00000067533	ENSG00000067533	51018	RRP15
IGF1	1	Ignatiadis2012_autoSplit.IGF1.Up	entrezgene	51022	ENSG00000023572	ENSG00000023572	51022	GLRX2
IGF1	1	Ignatiadis2012_autoSplit.IGF1.Up	entrezgene	51025	ENSG00000217930	--	--	--
IGF1	1	Ignatiadis2012_autoSplit.IGF1.Up	entrezgene	5104	ENSG00000188488	ENSG00000188488	5104	SERPINA5
IGF1	1	Ignatiadis2012_autoSplit.IGF1.Up	entrezgene	5106	ENSG00000100889	ENSG00000100889	5106	PCK2
IGF1	1	Ignatiadis2012_autoSplit.IGF1.Up	entrezgene	51073	ENSG00000105364	ENSG00000105364	51073	MRPL4
IGF1	1	Ignatiadis2012_autoSplit.IGF1.Up	entrezgene	51075	ENSG00000213593	--	--	--
IGF1	1	Ignatiadis2012_autoSplit.IGF1.Up	entrezgene	51083	ENSG00000069482	ENSG00000069482	51083	GAL
IGF1	1	Ignatiadis2012_autoSplit.IGF1.Up	entrezgene	51087	ENSG00000006047	ENSG00000006047	51087	YBX2
IGF1	1	Ignatiadis2012_autoSplit.IGF1.Up	entrezgene	51109	ENSG00000072042	ENSG00000072042	51109	RDH11
IGF1	1	Ignatiadis2012_autoSplit.IGF1.Up	entrezgene	51236	ENSG00000235173	--	--	--
IGF1	1	Ignatiadis2012_autoSplit.IGF1.Up	entrezgene	51330	ENSG00000006327	ENSG00000006327	51330	TNFRSF12A
IGF1	1	Ignatiadis2012_autoSplit.IGF1.Up	entrezgene	51400	ENSG00000214517	ENSG00000214517	51400	PPME1
IGF1	1	Ignatiadis2012_autoSplit.IGF1.Up	entrezgene	51728	ENSG00000161980	ENSG00000161980	51728	POLR3K
IGF1	1	Ignatiadis2012_autoSplit.IGF1.Up	entrezgene	5214	ENSG00000067057	ENSG00000067057	5214	PFKP
IGF1	1	Ignatiadis2012_autoSplit.IGF1.Up	entrezgene	5277	ENSG00000165195	ENSG00000165195	5277	PIGA
IGF1	1	Ignatiadis2012_autoSplit.IGF1.Up	entrezgene	5373	ENSG00000140650	ENSG00000140650	5373	PMM2
IGF1	1	Ignatiadis2012_autoSplit.IGF1.Up	entrezgene	53838	ENSG00000171067	ENSG00000171067	53838	C11orf24
IGF1	1	Ignatiadis2012_autoSplit.IGF1.Up	entrezgene	54205	ENSG00000172115	ENSG00000172115	54205	CYCS
IGF1	1	Ignatiadis2012_autoSplit.IGF1.Up	entrezgene	5427	ENSG00000100479	ENSG00000100479	5427	POLE2
IGF1	1	Ignatiadis2012_autoSplit.IGF1.Up	entrezgene	54442	ENSG00000167977	ENSG00000167977	54442	KCTD5
IGF1	1	Ignatiadis2012_autoSplit.IGF1.Up	entrezgene	54476	ENSG00000011275	ENSG00000011275	54476	RNF216
IGF1	1	Ignatiadis2012_autoSplit.IGF1.Up	entrezgene	54541	ENSG00000168209	ENSG00000168209	54541	DDIT4
IGF1	1	Ignatiadis2012_autoSplit.IGF1.Up	entrezgene	54663	ENSG00000133316	ENSG00000133316	54663	WDR74
IGF1	1	Ignatiadis2012_autoSplit.IGF1.Up	entrezgene	54849	ENSG00000140995	ENSG00000140995	54849	DEF8
IGF1	1	Ignatiadis2012_autoSplit.IGF1.Up	entrezgene	54898	ENSG00000197977	ENSG00000197977	54898	ELOVL2
IGF1	1	Ignatiadis2012_autoSplit.IGF1.Up	entrezgene	55038	ENSG00000170779	ENSG00000170779	55038	CDCA4
IGF1	1	Ignatiadis2012_autoSplit.IGF1.Up	entrezgene	55061	ENSG00000143502	ENSG00000143502	55061	SUSD4
IGF1	1	Ignatiadis2012_autoSplit.IGF1.Up	entrezgene	55071	ENSG00000135045	ENSG00000135045	55071	C9orf40
IGF1	1	Ignatiadis2012_autoSplit.IGF1.Up	entrezgene	55110	ENSG00000111196	ENSG00000111196	55110	MAGOHB
IGF1	1	Ignatiadis2012_autoSplit.IGF1.Up	entrezgene	55111	ENSG00000104886	--	--	--
IGF1	1	Ignatiadis2012_autoSplit.IGF1.Up	entrezgene	55168	ENSG00000096080	ENSG00000096080	55168	MRPS18A
IGF1	1	Ignatiadis2012_autoSplit.IGF1.Up	entrezgene	55176	ENSG00000065665	ENSG00000065665	55176	SEC61A2
IGF1	1	Ignatiadis2012_autoSplit.IGF1.Up	entrezgene	55224	ENSG00000143845	ENSG00000143845	55224	ETNK2
IGF1	1	Ignatiadis2012_autoSplit.IGF1.Up	entrezgene	55312	ENSG00000135002	ENSG00000135002	55312	RFK
IGF1	1	Ignatiadis2012_autoSplit.IGF1.Up	entrezgene	5534	ENSG00000221823	ENSG00000221823	5534	PPP3R1
IGF1	1	Ignatiadis2012_autoSplit.IGF1.Up	entrezgene	55341	ENSG00000041802	ENSG00000041802	55341	LSG1
IGF1	1	Ignatiadis2012_autoSplit.IGF1.Up	entrezgene	55379	ENSG00000108829	ENSG00000108829	55379	LRRC59
IGF1	1	Ignatiadis2012_autoSplit.IGF1.Up	entrezgene	55388	ENSG00000065328	ENSG00000065328	55388	MCM10
IGF1	1	Ignatiadis2012_autoSplit.IGF1.Up	entrezgene	55630	ENSG00000147804	--	--	--
IGF1	1	Ignatiadis2012_autoSplit.IGF1.Up	entrezgene	55700	ENSG00000116871	ENSG00000116871	55700	MAP7D1
IGF1	1	Ignatiadis2012_autoSplit.IGF1.Up	entrezgene	55720	ENSG00000167721	ENSG00000167721	55720	TSR1
IGF1	1	Ignatiadis2012_autoSplit.IGF1.Up	entrezgene	55969	ENSG00000101084	--	--	--
IGF1	1	Ignatiadis2012_autoSplit.IGF1.Up	entrezgene	55975	ENSG00000122550	ENSG00000122550	55975	KLHL7
IGF1	1	Ignatiadis2012_autoSplit.IGF1.Up	entrezgene	5601	ENSG00000050748	ENSG00000050748	5601	MAPK9
IGF1	1	Ignatiadis2012_autoSplit.IGF1.Up	entrezgene	5621	ENSG00000171867	ENSG00000171867	5621	PRNP
IGF1	1	Ignatiadis2012_autoSplit.IGF1.Up	entrezgene	56894	ENSG00000160216	ENSG00000160216	56894	AGPAT3
IGF1	1	Ignatiadis2012_autoSplit.IGF1.Up	entrezgene	56935	ENSG00000166002	ENSG00000166002	56935	C11orf75
IGF1	1	Ignatiadis2012_autoSplit.IGF1.Up	entrezgene	56942	ENSG00000103121	ENSG00000103121	56942	C16orf61
IGF1	1	Ignatiadis2012_autoSplit.IGF1.Up	entrezgene	57060	ENSG00000090097	ENSG00000090097	57060	PCBP4
IGF1	1	Ignatiadis2012_autoSplit.IGF1.Up	entrezgene	57102	ENSG00000047621	ENSG00000047621	57102	C12orf4
IGF1	1	Ignatiadis2012_autoSplit.IGF1.Up	entrezgene	5723	ENSG00000146733	ENSG00000146733	5723	PSPH
IGF1	1	Ignatiadis2012_autoSplit.IGF1.Up	entrezgene	57418	ENSG00000065268	ENSG00000065268	57418	WDR18
IGF1	1	Ignatiadis2012_autoSplit.IGF1.Up	entrezgene	57596	ENSG00000183092	ENSG00000183092	57596	BEGAIN
IGF1	1	Ignatiadis2012_autoSplit.IGF1.Up	entrezgene	57706	ENSG00000119522	ENSG00000119522	57706	DENND1A
IGF1	1	Ignatiadis2012_autoSplit.IGF1.Up	entrezgene	57761	ENSG00000101255	ENSG00000101255	57761	TRIB3
IGF1	1	Ignatiadis2012_autoSplit.IGF1.Up	entrezgene	578	ENSG00000030110	ENSG00000030110	578	BAK1
IGF1	1	Ignatiadis2012_autoSplit.IGF1.Up	entrezgene	5831	ENSG00000183010	--	--	--
IGF1	1	Ignatiadis2012_autoSplit.IGF1.Up	entrezgene	5833	ENSG00000185813	ENSG00000185813	5833	PCYT2
IGF1	1	Ignatiadis2012_autoSplit.IGF1.Up	entrezgene	58526	ENSG00000165175	ENSG00000165175	58526	MID1IP1
IGF1	1	Ignatiadis2012_autoSplit.IGF1.Up	entrezgene	58986	ENSG00000129925	ENSG00000129925	58986	TMEM8A
IGF1	1	Ignatiadis2012_autoSplit.IGF1.Up	entrezgene	5983	ENSG00000133119	ENSG00000133119	5983	RFC3
IGF1	1	Ignatiadis2012_autoSplit.IGF1.Up	entrezgene	5985	ENSG00000111445	ENSG00000111445	5985	RFC5
IGF1	1	Ignatiadis2012_autoSplit.IGF1.Up	entrezgene	60673	ENSG00000123395	ENSG00000123395	60673	C12orf44
IGF1	1	Ignatiadis2012_autoSplit.IGF1.Up	entrezgene	617	ENSG00000074582	ENSG00000074582	617	BCS1L
IGF1	1	Ignatiadis2012_autoSplit.IGF1.Up	entrezgene	6182	ENSG00000262814	ENSG00000262814	6182	MRPL12
IGF1	1	Ignatiadis2012_autoSplit.IGF1.Up	entrezgene	6197	ENSG00000177189	ENSG00000177189	6197	RPS6KA3
IGF1	1	Ignatiadis2012_autoSplit.IGF1.Up	entrezgene	6199	ENSG00000175634	ENSG00000175634	6199	RPS6KB2
IGF1	1	Ignatiadis2012_autoSplit.IGF1.Up	entrezgene	6301	ENSG00000031698	ENSG00000031698	6301	SARS
IGF1	1	Ignatiadis2012_autoSplit.IGF1.Up	entrezgene	6319	ENSG00000099194	ENSG00000099194	6319	SCD
IGF1	1	Ignatiadis2012_autoSplit.IGF1.Up	entrezgene	64118	ENSG00000169718	ENSG00000169718	64118	DUS1L
IGF1	1	Ignatiadis2012_autoSplit.IGF1.Up	entrezgene	64222	ENSG00000186283	ENSG00000186283	64222	TOR3A
IGF1	1	Ignatiadis2012_autoSplit.IGF1.Up	entrezgene	645	ENSG00000090013	ENSG00000090013	645	BLVRB
IGF1	1	Ignatiadis2012_autoSplit.IGF1.Up	entrezgene	6472	ENSG00000182199	ENSG00000182199	6472	SHMT2
IGF1	1	Ignatiadis2012_autoSplit.IGF1.Up	entrezgene	64782	ENSG00000181026	ENSG00000181026	64782	AEN
IGF1	1	Ignatiadis2012_autoSplit.IGF1.Up	entrezgene	6510	ENSG00000105281	ENSG00000105281	6510	SLC1A5
IGF1	1	Ignatiadis2012_autoSplit.IGF1.Up	entrezgene	6520	ENSG00000168003	ENSG00000168003	6520	SLC3A2
IGF1	1	Ignatiadis2012_autoSplit.IGF1.Up	entrezgene	6535	ENSG00000130821	ENSG00000130821	6535	SLC6A8
IGF1	1	Ignatiadis2012_autoSplit.IGF1.Up	entrezgene	6541	ENSG00000139514	ENSG00000139514	6541	SLC7A1
IGF1	1	Ignatiadis2012_autoSplit.IGF1.Up	entrezgene	655	ENSG00000101144	ENSG00000101144	655	BMP7
IGF1	1	Ignatiadis2012_autoSplit.IGF1.Up	entrezgene	6576	ENSG00000100075	ENSG00000100075	6576	SLC25A1
IGF1	1	Ignatiadis2012_autoSplit.IGF1.Up	entrezgene	65990	ENSG00000103254	ENSG00000103254	65990	FAM173A
IGF1	1	Ignatiadis2012_autoSplit.IGF1.Up	entrezgene	6624	ENSG00000075618	ENSG00000075618	6624	FSCN1
IGF1	1	Ignatiadis2012_autoSplit.IGF1.Up	entrezgene	6627	ENSG00000131876	ENSG00000131876	6627	SNRPA1
IGF1	1	Ignatiadis2012_autoSplit.IGF1.Up	entrezgene	6674	ENSG00000104450	ENSG00000104450	6674	SPAG1
IGF1	1	Ignatiadis2012_autoSplit.IGF1.Up	entrezgene	6721	ENSG00000198911	ENSG00000198911	6721	SREBF2
IGF1	1	Ignatiadis2012_autoSplit.IGF1.Up	entrezgene	6723	ENSG00000116649	ENSG00000116649	6723	SRM
IGF1	1	Ignatiadis2012_autoSplit.IGF1.Up	entrezgene	6897	ENSG00000113407	ENSG00000113407	6897	TARS
IGF1	1	Ignatiadis2012_autoSplit.IGF1.Up	entrezgene	6949	ENSG00000070814	ENSG00000070814	6949	TCOF1
IGF1	1	Ignatiadis2012_autoSplit.IGF1.Up	entrezgene	6950	ENSG00000120438	ENSG00000120438	6950	TCP1
IGF1	1	Ignatiadis2012_autoSplit.IGF1.Up	entrezgene	7083	ENSG00000167900	ENSG00000167900	7083	TK1
IGF1	1	Ignatiadis2012_autoSplit.IGF1.Up	entrezgene	7262	ENSG00000181649	ENSG00000181649	7262	PHLDA2
IGF1	1	Ignatiadis2012_autoSplit.IGF1.Up	entrezgene	7264	ENSG00000104522	ENSG00000104522	7264	TSTA3
IGF1	1	Ignatiadis2012_autoSplit.IGF1.Up	entrezgene	7277	ENSG00000127824	ENSG00000127824	7277	TUBA4A
IGF1	1	Ignatiadis2012_autoSplit.IGF1.Up	entrezgene	7283	ENSG00000131462	ENSG00000131462	7283	TUBG1
IGF1	1	Ignatiadis2012_autoSplit.IGF1.Up	entrezgene	7347	ENSG00000118939	ENSG00000118939	7347	UCHL3
IGF1	1	Ignatiadis2012_autoSplit.IGF1.Up	entrezgene	7407	ENSG00000204394	--	--	--
IGF1	1	Ignatiadis2012_autoSplit.IGF1.Up	entrezgene	7422	ENSG00000112715	ENSG00000112715	7422	VEGFA
IGF1	1	Ignatiadis2012_autoSplit.IGF1.Up	entrezgene	7443	ENSG00000100749	ENSG00000100749	7443	VRK1
IGF1	1	Ignatiadis2012_autoSplit.IGF1.Up	entrezgene	7453	ENSG00000140105	ENSG00000140105	7453	WARS
IGF1	1	Ignatiadis2012_autoSplit.IGF1.Up	entrezgene	762	ENSG00000167434	ENSG00000167434	762	CA4
IGF1	1	Ignatiadis2012_autoSplit.IGF1.Up	entrezgene	7791	ENSG00000159840	ENSG00000159840	7791	ZYX
IGF1	1	Ignatiadis2012_autoSplit.IGF1.Up	entrezgene	7804	ENSG00000157193	ENSG00000157193	7804	LRP8
IGF1	1	Ignatiadis2012_autoSplit.IGF1.Up	entrezgene	7866	ENSG00000214706	--	--	--
IGF1	1	Ignatiadis2012_autoSplit.IGF1.Up	entrezgene	79000	ENSG00000127423	ENSG00000127423	79000	C1orf135
IGF1	1	Ignatiadis2012_autoSplit.IGF1.Up	entrezgene	79006	ENSG00000103260	ENSG00000103260	79006	METRN
IGF1	1	Ignatiadis2012_autoSplit.IGF1.Up	entrezgene	79050	ENSG00000184967	ENSG00000184967	79050	NOC4L
IGF1	1	Ignatiadis2012_autoSplit.IGF1.Up	entrezgene	79071	ENSG00000170522	ENSG00000170522	79071	ELOVL6
IGF1	1	Ignatiadis2012_autoSplit.IGF1.Up	entrezgene	79080	ENSG00000110104	ENSG00000110104	79080	CCDC86
IGF1	1	Ignatiadis2012_autoSplit.IGF1.Up	entrezgene	79094	ENSG00000128965	ENSG00000128965	79094	CHAC1
IGF1	1	Ignatiadis2012_autoSplit.IGF1.Up	entrezgene	79154	ENSG00000278535	--	--	--
IGF1	1	Ignatiadis2012_autoSplit.IGF1.Up	entrezgene	79174	ENSG00000184164	ENSG00000184164	79174	CRELD2
IGF1	1	Ignatiadis2012_autoSplit.IGF1.Up	entrezgene	79180	ENSG00000142634	ENSG00000142634	79180	EFHD2
IGF1	1	Ignatiadis2012_autoSplit.IGF1.Up	entrezgene	79412	ENSG00000131650	ENSG00000131650	79412	KREMEN2
IGF1	1	Ignatiadis2012_autoSplit.IGF1.Up	entrezgene	79573	ENSG00000143643	ENSG00000143643	79573	TTC13
IGF1	1	Ignatiadis2012_autoSplit.IGF1.Up	entrezgene	79581	ENSG00000185803	--	--	--
IGF1	1	Ignatiadis2012_autoSplit.IGF1.Up	entrezgene	79609	ENSG00000100483	ENSG00000100483	79609	METTL21D
IGF1	1	Ignatiadis2012_autoSplit.IGF1.Up	entrezgene	79693	ENSG00000196449	ENSG00000196449	79693	YRDC
IGF1	1	Ignatiadis2012_autoSplit.IGF1.Up	entrezgene	79710	ENSG00000133131	ENSG00000133131	79710	MORC4
IGF1	1	Ignatiadis2012_autoSplit.IGF1.Up	entrezgene	79711	ENSG00000196497	ENSG00000196497	79711	IPO4
IGF1	1	Ignatiadis2012_autoSplit.IGF1.Up	entrezgene	80178	ENSG00000162062	ENSG00000162062	80178	C16orf59
IGF1	1	Ignatiadis2012_autoSplit.IGF1.Up	entrezgene	80179	ENSG00000278259	--	--	--
IGF1	1	Ignatiadis2012_autoSplit.IGF1.Up	entrezgene	80742	ENSG00000204576	--	--	--
IGF1	1	Ignatiadis2012_autoSplit.IGF1.Up	entrezgene	8078	ENSG00000111667	ENSG00000111667	8078	USP5
IGF1	1	Ignatiadis2012_autoSplit.IGF1.Up	entrezgene	81	ENSG00000130402	ENSG00000130402	81	ACTN4
IGF1	1	Ignatiadis2012_autoSplit.IGF1.Up	entrezgene	81034	ENSG00000164933	ENSG00000164933	81034	SLC25A32
IGF1	1	Ignatiadis2012_autoSplit.IGF1.Up	entrezgene	8140	ENSG00000103257	ENSG00000103257	8140	SLC7A5
IGF1	1	Ignatiadis2012_autoSplit.IGF1.Up	entrezgene	81570	ENSG00000162129	ENSG00000162129	81570	CLPB
IGF1	1	Ignatiadis2012_autoSplit.IGF1.Up	entrezgene	816	ENSG00000058404	ENSG00000058404	816	CAMK2B
IGF1	1	Ignatiadis2012_autoSplit.IGF1.Up	entrezgene	81873	ENSG00000136950	ENSG00000136950	81873	ARPC5L
IGF1	1	Ignatiadis2012_autoSplit.IGF1.Up	entrezgene	81894	ENSG00000155287	ENSG00000155287	81894	SLC25A28
IGF1	1	Ignatiadis2012_autoSplit.IGF1.Up	entrezgene	8260	ENSG00000102030	ENSG00000102030	8260	NAA10
IGF1	1	Ignatiadis2012_autoSplit.IGF1.Up	entrezgene	8273	ENSG00000126903	ENSG00000126903	8273	SLC10A3
IGF1	1	Ignatiadis2012_autoSplit.IGF1.Up	entrezgene	833	ENSG00000110619	ENSG00000110619	833	CARS
IGF1	1	Ignatiadis2012_autoSplit.IGF1.Up	entrezgene	83743	ENSG00000105447	ENSG00000105447	83743	GRWD1
IGF1	1	Ignatiadis2012_autoSplit.IGF1.Up	entrezgene	8402	ENSG00000108528	ENSG00000108528	8402	SLC25A11
IGF1	1	Ignatiadis2012_autoSplit.IGF1.Up	entrezgene	84065	ENSG00000186501	ENSG00000186501	84065	TMEM222
IGF1	1	Ignatiadis2012_autoSplit.IGF1.Up	entrezgene	8407	ENSG00000158710	ENSG00000158710	8407	TAGLN2
IGF1	1	Ignatiadis2012_autoSplit.IGF1.Up	entrezgene	84549	ENSG00000198042	ENSG00000198042	84549	MAK16
IGF1	1	Ignatiadis2012_autoSplit.IGF1.Up	entrezgene	84617	ENSG00000176014	ENSG00000176014	84617	TUBB6
IGF1	1	Ignatiadis2012_autoSplit.IGF1.Up	entrezgene	84790	ENSG00000167553	ENSG00000167553	84790	TUBA1C
IGF1	1	Ignatiadis2012_autoSplit.IGF1.Up	entrezgene	8487	ENSG00000092208	ENSG00000092208	8487	SIP1
IGF1	1	Ignatiadis2012_autoSplit.IGF1.Up	entrezgene	8533	ENSG00000141030	ENSG00000141030	8533	COPS3
IGF1	1	Ignatiadis2012_autoSplit.IGF1.Up	entrezgene	8573	ENSG00000147044	ENSG00000147044	8573	CASK
IGF1	1	Ignatiadis2012_autoSplit.IGF1.Up	entrezgene	8623	ENSG00000169093	ENSG00000169093	8623	ASMTL
IGF1	1	Ignatiadis2012_autoSplit.IGF1.Up	entrezgene	8669	ENSG00000104131	ENSG00000104131	8669	EIF3J
IGF1	1	Ignatiadis2012_autoSplit.IGF1.Up	entrezgene	8682	ENSG00000162734	ENSG00000162734	8682	PEA15
IGF1	1	Ignatiadis2012_autoSplit.IGF1.Up	entrezgene	87	ENSG00000072110	ENSG00000072110	87	ACTN1
IGF1	1	Ignatiadis2012_autoSplit.IGF1.Up	entrezgene	8726	ENSG00000074266	ENSG00000074266	8726	EED
IGF1	1	Ignatiadis2012_autoSplit.IGF1.Up	entrezgene	8818	ENSG00000136908	ENSG00000136908	8818	DPM2
IGF1	1	Ignatiadis2012_autoSplit.IGF1.Up	entrezgene	8829	ENSG00000099250	ENSG00000099250	8829	NRP1
IGF1	1	Ignatiadis2012_autoSplit.IGF1.Up	entrezgene	8877	ENSG00000176170	ENSG00000176170	8877	SPHK1
IGF1	1	Ignatiadis2012_autoSplit.IGF1.Up	entrezgene	8891	ENSG00000070785	ENSG00000070785	8891	EIF2B3
IGF1	1	Ignatiadis2012_autoSplit.IGF1.Up	entrezgene	8900	ENSG00000133101	ENSG00000133101	8900	CCNA1
IGF1	1	Ignatiadis2012_autoSplit.IGF1.Up	entrezgene	896	ENSG00000112576	ENSG00000112576	896	CCND3
IGF1	1	Ignatiadis2012_autoSplit.IGF1.Up	entrezgene	8974	ENSG00000072682	ENSG00000072682	8974	P4HA2
IGF1	1	Ignatiadis2012_autoSplit.IGF1.Up	entrezgene	89797	ENSG00000166833	ENSG00000166833	89797	NAV2
IGF1	1	Ignatiadis2012_autoSplit.IGF1.Up	entrezgene	8985	ENSG00000106397	ENSG00000106397	8985	PLOD3
IGF1	1	Ignatiadis2012_autoSplit.IGF1.Up	entrezgene	8986	ENSG00000162302	ENSG00000162302	8986	RPS6KA4
IGF1	1	Ignatiadis2012_autoSplit.IGF1.Up	entrezgene	9040	ENSG00000130725	ENSG00000130725	9040	UBE2M
IGF1	1	Ignatiadis2012_autoSplit.IGF1.Up	entrezgene	9129	ENSG00000117360	--	--	--
IGF1	1	Ignatiadis2012_autoSplit.IGF1.Up	entrezgene	9141	ENSG00000105185	ENSG00000105185	9141	PDCD5
IGF1	1	Ignatiadis2012_autoSplit.IGF1.Up	entrezgene	9145	ENSG00000100321	ENSG00000100321	9145	SYNGR1
IGF1	1	Ignatiadis2012_autoSplit.IGF1.Up	entrezgene	91860	ENSG00000129007	ENSG00000129007	91860	CALML4
IGF1	1	Ignatiadis2012_autoSplit.IGF1.Up	entrezgene	92170	ENSG00000148824	ENSG00000148824	92170	MTG1
IGF1	1	Ignatiadis2012_autoSplit.IGF1.Up	entrezgene	9238	ENSG00000136270	ENSG00000136270	9238	TBRG4
IGF1	1	Ignatiadis2012_autoSplit.IGF1.Up	entrezgene	9260	ENSG00000196923	ENSG00000196923	9260	PDLIM7
IGF1	1	Ignatiadis2012_autoSplit.IGF1.Up	entrezgene	9270	ENSG00000119185	ENSG00000119185	9270	ITGB1BP1
IGF1	1	Ignatiadis2012_autoSplit.IGF1.Up	entrezgene	9361	ENSG00000196365	ENSG00000196365	9361	LONP1
IGF1	1	Ignatiadis2012_autoSplit.IGF1.Up	entrezgene	9455	ENSG00000103942	ENSG00000103942	9455	HOMER2
IGF1	1	Ignatiadis2012_autoSplit.IGF1.Up	entrezgene	9466	ENSG00000104998	ENSG00000104998	9466	IL27RA
IGF1	1	Ignatiadis2012_autoSplit.IGF1.Up	entrezgene	955	ENSG00000197586	ENSG00000197586	955	ENTPD6
IGF1	1	Ignatiadis2012_autoSplit.IGF1.Up	entrezgene	9631	ENSG00000113569	ENSG00000113569	9631	NUP155
IGF1	1	Ignatiadis2012_autoSplit.IGF1.Up	entrezgene	9636	ENSG00000187608	ENSG00000187608	9636	ISG15
IGF1	1	Ignatiadis2012_autoSplit.IGF1.Up	entrezgene	9738	ENSG00000103540	ENSG00000103540	9738	CP110
IGF1	1	Ignatiadis2012_autoSplit.IGF1.Up	entrezgene	9807	ENSG00000176095	ENSG00000176095	9807	IP6K1
IGF1	1	Ignatiadis2012_autoSplit.IGF1.Up	entrezgene	9818	ENSG00000139496	ENSG00000139496	9818	NUPL1
IGF1	1	Ignatiadis2012_autoSplit.IGF1.Up	entrezgene	9830	ENSG00000106785	ENSG00000106785	9830	TRIM14
IGF1	1	Ignatiadis2012_autoSplit.IGF1.Up	entrezgene	9933	ENSG00000080608	ENSG00000080608	9933	KIAA0020
IGF1	1	Ignatiadis2012_autoSplit.IGF1.Up	entrezgene	9948	ENSG00000071127	ENSG00000071127	9948	WDR1
IGF1	-1	Ignatiadis2012_autoSplit.IGF1.Down	entrezgene	10023	ENSG00000165879	ENSG00000165879	10023	FRAT1
IGF1	-1	Ignatiadis2012_autoSplit.IGF1.Down	entrezgene	10040	ENSG00000141198	ENSG00000141198	10040	TOM1L1
IGF1	-1	Ignatiadis2012_autoSplit.IGF1.Down	entrezgene	10106	ENSG00000175215	ENSG00000175215	10106	CTDSP2
IGF1	-1	Ignatiadis2012_autoSplit.IGF1.Down	entrezgene	10129	ENSG00000073910	ENSG00000073910	10129	FRY
IGF1	-1	Ignatiadis2012_autoSplit.IGF1.Down	entrezgene	10133	ENSG00000123240	ENSG00000123240	10133	OPTN
IGF1	-1	Ignatiadis2012_autoSplit.IGF1.Down	entrezgene	10142	ENSG00000127914	ENSG00000127914	10142	AKAP9
IGF1	-1	Ignatiadis2012_autoSplit.IGF1.Down	entrezgene	10179	ENSG00000076053	ENSG00000076053	10179	RBM7
IGF1	-1	Ignatiadis2012_autoSplit.IGF1.Down	entrezgene	10267	ENSG00000132329	ENSG00000132329	10267	RAMP1
IGF1	-1	Ignatiadis2012_autoSplit.IGF1.Down	entrezgene	10282	ENSG00000105829	ENSG00000105829	10282	BET1
IGF1	-1	Ignatiadis2012_autoSplit.IGF1.Down	entrezgene	10284	ENSG00000150459	ENSG00000150459	10284	SAP18
IGF1	-1	Ignatiadis2012_autoSplit.IGF1.Down	entrezgene	10314	ENSG00000115365	ENSG00000115365	10314	LANCL1
IGF1	-1	Ignatiadis2012_autoSplit.IGF1.Down	entrezgene	10325	ENSG00000083750	ENSG00000083750	10325	RRAGB
IGF1	-1	Ignatiadis2012_autoSplit.IGF1.Down	entrezgene	10370	ENSG00000164442	ENSG00000164442	10370	CITED2
IGF1	-1	Ignatiadis2012_autoSplit.IGF1.Down	entrezgene	10397	ENSG00000104419	ENSG00000104419	10397	NDRG1
IGF1	-1	Ignatiadis2012_autoSplit.IGF1.Down	entrezgene	104	ENSG00000197381	ENSG00000197381	104	ADARB1
IGF1	-1	Ignatiadis2012_autoSplit.IGF1.Down	entrezgene	10451	ENSG00000134215	ENSG00000134215	10451	VAV3
IGF1	-1	Ignatiadis2012_autoSplit.IGF1.Down	entrezgene	10610	ENSG00000070731	ENSG00000070731	10610	ST6GALNAC2
IGF1	-1	Ignatiadis2012_autoSplit.IGF1.Down	entrezgene	107	ENSG00000164742	ENSG00000164742	107	ADCY1
IGF1	-1	Ignatiadis2012_autoSplit.IGF1.Down	entrezgene	10742	ENSG00000131831	ENSG00000131831	10742	RAI2
IGF1	-1	Ignatiadis2012_autoSplit.IGF1.Down	entrezgene	10753	ENSG00000135773	ENSG00000135773	10753	CAPN9
IGF1	-1	Ignatiadis2012_autoSplit.IGF1.Down	entrezgene	10826	ENSG00000170271	ENSG00000170271	10826	C5orf4
IGF1	-1	Ignatiadis2012_autoSplit.IGF1.Down	entrezgene	10916	ENSG00000102316	ENSG00000102316	10916	MAGED2
IGF1	-1	Ignatiadis2012_autoSplit.IGF1.Down	entrezgene	10924	ENSG00000172594	ENSG00000172594	10924	SMPDL3A
IGF1	-1	Ignatiadis2012_autoSplit.IGF1.Down	entrezgene	10928	ENSG00000017797	ENSG00000017797	10928	RALBP1
IGF1	-1	Ignatiadis2012_autoSplit.IGF1.Down	entrezgene	10957	ENSG00000146278	ENSG00000146278	10957	PNRC1
IGF1	-1	Ignatiadis2012_autoSplit.IGF1.Down	entrezgene	1102	ENSG00000136161	ENSG00000136161	1102	RCBTB2
IGF1	-1	Ignatiadis2012_autoSplit.IGF1.Down	entrezgene	11045	ENSG00000105668	ENSG00000105668	11045	UPK1A
IGF1	-1	Ignatiadis2012_autoSplit.IGF1.Down	entrezgene	11046	ENSG00000130958	ENSG00000130958	11046	SLC35D2
IGF1	-1	Ignatiadis2012_autoSplit.IGF1.Down	entrezgene	11069	ENSG00000091428	ENSG00000091428	11069	RAPGEF4
IGF1	-1	Ignatiadis2012_autoSplit.IGF1.Down	entrezgene	1112	ENSG00000053254	ENSG00000053254	1112	FOXN3
IGF1	-1	Ignatiadis2012_autoSplit.IGF1.Down	entrezgene	11152	ENSG00000196998	ENSG00000196998	11152	WDR45
IGF1	-1	Ignatiadis2012_autoSplit.IGF1.Down	entrezgene	1122	ENSG00000203668	ENSG00000203668	1122	CHML
IGF1	-1	Ignatiadis2012_autoSplit.IGF1.Down	entrezgene	112611	ENSG00000013392	ENSG00000013392	112611	RWDD2A
IGF1	-1	Ignatiadis2012_autoSplit.IGF1.Down	entrezgene	11345	ENSG00000034713	ENSG00000034713	11345	GABARAPL2
IGF1	-1	Ignatiadis2012_autoSplit.IGF1.Down	entrezgene	113791	ENSG00000100100	ENSG00000100100	113791	PIK3IP1
IGF1	-1	Ignatiadis2012_autoSplit.IGF1.Down	entrezgene	114625	ENSG00000164010	ENSG00000164010	114625	ERMAP
IGF1	-1	Ignatiadis2012_autoSplit.IGF1.Down	entrezgene	114876	ENSG00000141447	ENSG00000141447	114876	OSBPL1A
IGF1	-1	Ignatiadis2012_autoSplit.IGF1.Down	entrezgene	114883	ENSG00000117859	ENSG00000117859	114883	OSBPL9
IGF1	-1	Ignatiadis2012_autoSplit.IGF1.Down	entrezgene	120	ENSG00000148700	ENSG00000148700	120	ADD3
IGF1	-1	Ignatiadis2012_autoSplit.IGF1.Down	entrezgene	1200	ENSG00000166340	ENSG00000166340	1200	TPP1
IGF1	-1	Ignatiadis2012_autoSplit.IGF1.Down	entrezgene	123	ENSG00000147872	ENSG00000147872	123	PLIN2
IGF1	-1	Ignatiadis2012_autoSplit.IGF1.Down	entrezgene	123872	ENSG00000154099	ENSG00000154099	123872	LRRC50
IGF1	-1	Ignatiadis2012_autoSplit.IGF1.Down	entrezgene	1299	ENSG00000092758	ENSG00000092758	1299	COL9A3
IGF1	-1	Ignatiadis2012_autoSplit.IGF1.Down	entrezgene	1315	ENSG00000129083	ENSG00000129083	1315	COPB1
IGF1	-1	Ignatiadis2012_autoSplit.IGF1.Down	entrezgene	1326	ENSG00000107968	ENSG00000107968	1326	MAP3K8
IGF1	-1	Ignatiadis2012_autoSplit.IGF1.Down	entrezgene	1362	ENSG00000108582	ENSG00000108582	1362	CPD
IGF1	-1	Ignatiadis2012_autoSplit.IGF1.Down	entrezgene	143	ENSG00000102699	ENSG00000102699	143	PARP4
IGF1	-1	Ignatiadis2012_autoSplit.IGF1.Down	entrezgene	1506	ENSG00000141086	ENSG00000141086	1506	CTRL
IGF1	-1	Ignatiadis2012_autoSplit.IGF1.Down	entrezgene	151050	ENSG00000144445	ENSG00000144445	151050	C2orf67
IGF1	-1	Ignatiadis2012_autoSplit.IGF1.Down	entrezgene	1604	ENSG00000196352	ENSG00000196352	1604	CD55
IGF1	-1	Ignatiadis2012_autoSplit.IGF1.Down	entrezgene	1733	ENSG00000211452	ENSG00000211452	1733	DIO1
IGF1	-1	Ignatiadis2012_autoSplit.IGF1.Down	entrezgene	1942	ENSG00000169242	ENSG00000169242	1942	EFNA1
IGF1	-1	Ignatiadis2012_autoSplit.IGF1.Down	entrezgene	1962	ENSG00000113790	ENSG00000113790	1962	EHHADH
IGF1	-1	Ignatiadis2012_autoSplit.IGF1.Down	entrezgene	1974	ENSG00000156976	ENSG00000156976	1974	EIF4A2
IGF1	-1	Ignatiadis2012_autoSplit.IGF1.Down	entrezgene	1992	ENSG00000021355	ENSG00000021355	1992	SERPINB1
IGF1	-1	Ignatiadis2012_autoSplit.IGF1.Down	entrezgene	2053	ENSG00000120915	ENSG00000120915	2053	EPHX2
IGF1	-1	Ignatiadis2012_autoSplit.IGF1.Down	entrezgene	2065	ENSG00000065361	ENSG00000065361	2065	ERBB3
IGF1	-1	Ignatiadis2012_autoSplit.IGF1.Down	entrezgene	2066	ENSG00000178568	ENSG00000178568	2066	ERBB4
IGF1	-1	Ignatiadis2012_autoSplit.IGF1.Down	entrezgene	2073	ENSG00000134899	--	--	--
IGF1	-1	Ignatiadis2012_autoSplit.IGF1.Down	entrezgene	2186	ENSG00000171634	--	--	--
IGF1	-1	Ignatiadis2012_autoSplit.IGF1.Down	entrezgene	2188	ENSG00000183161	ENSG00000183161	2188	FANCF
IGF1	-1	Ignatiadis2012_autoSplit.IGF1.Down	entrezgene	224	ENSG00000072210	ENSG00000072210	224	ALDH3A2
IGF1	-1	Ignatiadis2012_autoSplit.IGF1.Down	entrezgene	2258	ENSG00000129682	ENSG00000129682	2258	FGF13
IGF1	-1	Ignatiadis2012_autoSplit.IGF1.Down	entrezgene	2263	ENSG00000066468	ENSG00000066468	2263	FGFR2
IGF1	-1	Ignatiadis2012_autoSplit.IGF1.Down	entrezgene	2273	ENSG00000022267	ENSG00000022267	2273	FHL1
IGF1	-1	Ignatiadis2012_autoSplit.IGF1.Down	entrezgene	22882	ENSG00000178764	ENSG00000178764	22882	ZHX2
IGF1	-1	Ignatiadis2012_autoSplit.IGF1.Down	entrezgene	22920	ENSG00000075945	ENSG00000075945	22920	KIFAP3
IGF1	-1	Ignatiadis2012_autoSplit.IGF1.Down	entrezgene	2308	ENSG00000150907	ENSG00000150907	2308	FOXO1
IGF1	-1	Ignatiadis2012_autoSplit.IGF1.Down	entrezgene	23097	ENSG00000155111	ENSG00000155111	23097	CDK19
IGF1	-1	Ignatiadis2012_autoSplit.IGF1.Down	entrezgene	23158	ENSG00000109436	ENSG00000109436	23158	TBC1D9
IGF1	-1	Ignatiadis2012_autoSplit.IGF1.Down	entrezgene	23240	ENSG00000121210	ENSG00000121210	23240	KIAA0922
IGF1	-1	Ignatiadis2012_autoSplit.IGF1.Down	entrezgene	2330	ENSG00000131781	--	--	--
IGF1	-1	Ignatiadis2012_autoSplit.IGF1.Down	entrezgene	23321	ENSG00000109654	ENSG00000109654	23321	TRIM2
IGF1	-1	Ignatiadis2012_autoSplit.IGF1.Down	entrezgene	23327	ENSG00000049759	ENSG00000049759	23327	NEDD4L
IGF1	-1	Ignatiadis2012_autoSplit.IGF1.Down	entrezgene	23351	ENSG00000100441	ENSG00000100441	23351	KHNYN
IGF1	-1	Ignatiadis2012_autoSplit.IGF1.Down	entrezgene	23401	ENSG00000181274	ENSG00000181274	23401	FRAT2
IGF1	-1	Ignatiadis2012_autoSplit.IGF1.Down	entrezgene	23411	ENSG00000096717	ENSG00000096717	23411	SIRT1
IGF1	-1	Ignatiadis2012_autoSplit.IGF1.Down	entrezgene	23424	ENSG00000196116	ENSG00000196116	23424	TDRD7
IGF1	-1	Ignatiadis2012_autoSplit.IGF1.Down	entrezgene	23503	ENSG00000072121	ENSG00000072121	23503	ZFYVE26
IGF1	-1	Ignatiadis2012_autoSplit.IGF1.Down	entrezgene	2353	ENSG00000170345	ENSG00000170345	2353	FOS
IGF1	-1	Ignatiadis2012_autoSplit.IGF1.Down	entrezgene	23530	ENSG00000112992	ENSG00000112992	23530	NNT
IGF1	-1	Ignatiadis2012_autoSplit.IGF1.Down	entrezgene	23548	ENSG00000113638	ENSG00000113638	23548	TTC33
IGF1	-1	Ignatiadis2012_autoSplit.IGF1.Down	entrezgene	23550	ENSG00000125637	ENSG00000125637	23550	PSD4
IGF1	-1	Ignatiadis2012_autoSplit.IGF1.Down	entrezgene	23554	ENSG00000106025	ENSG00000106025	23554	TSPAN12
IGF1	-1	Ignatiadis2012_autoSplit.IGF1.Down	entrezgene	23588	ENSG00000165516	ENSG00000165516	23588	KLHDC2
IGF1	-1	Ignatiadis2012_autoSplit.IGF1.Down	entrezgene	23678	ENSG00000104205	ENSG00000104205	23678	SGK3
IGF1	-1	Ignatiadis2012_autoSplit.IGF1.Down	entrezgene	24149	ENSG00000171467	ENSG00000171467	24149	ZNF318
IGF1	-1	Ignatiadis2012_autoSplit.IGF1.Down	entrezgene	2515	ENSG00000104755	ENSG00000104755	2515	ADAM2
IGF1	-1	Ignatiadis2012_autoSplit.IGF1.Down	entrezgene	2517	ENSG00000179163	ENSG00000179163	2517	FUCA1
IGF1	-1	Ignatiadis2012_autoSplit.IGF1.Down	entrezgene	2535	ENSG00000180340	ENSG00000180340	2535	FZD2
IGF1	-1	Ignatiadis2012_autoSplit.IGF1.Down	entrezgene	25805	ENSG00000095739	ENSG00000095739	25805	BAMBI
IGF1	-1	Ignatiadis2012_autoSplit.IGF1.Down	entrezgene	2581	ENSG00000054983	ENSG00000054983	2581	GALC
IGF1	-1	Ignatiadis2012_autoSplit.IGF1.Down	entrezgene	25840	ENSG00000185432	ENSG00000185432	25840	METTL7A
IGF1	-1	Ignatiadis2012_autoSplit.IGF1.Down	entrezgene	25850	ENSG00000251247	ENSG00000251247	25850	ZNF345
IGF1	-1	Ignatiadis2012_autoSplit.IGF1.Down	entrezgene	25875	ENSG00000050426	ENSG00000050426	25875	LETMD1
IGF1	-1	Ignatiadis2012_autoSplit.IGF1.Down	entrezgene	25901	ENSG00000024862	ENSG00000024862	25901	CCDC28A
IGF1	-1	Ignatiadis2012_autoSplit.IGF1.Down	entrezgene	25913	ENSG00000128513	ENSG00000128513	25913	POT1
IGF1	-1	Ignatiadis2012_autoSplit.IGF1.Down	entrezgene	259230	ENSG00000198964	--	--	--
IGF1	-1	Ignatiadis2012_autoSplit.IGF1.Down	entrezgene	25949	ENSG00000117614	ENSG00000117614	25949	SYF2
IGF1	-1	Ignatiadis2012_autoSplit.IGF1.Down	entrezgene	25996	ENSG00000076043	ENSG00000076043	25996	REXO2
IGF1	-1	Ignatiadis2012_autoSplit.IGF1.Down	entrezgene	26018	ENSG00000144749	ENSG00000144749	26018	LRIG1
IGF1	-1	Ignatiadis2012_autoSplit.IGF1.Down	entrezgene	26100	ENSG00000157954	ENSG00000157954	26100	WIPI2
IGF1	-1	Ignatiadis2012_autoSplit.IGF1.Down	entrezgene	26235	ENSG00000112234	ENSG00000112234	26235	FBXL4
IGF1	-1	Ignatiadis2012_autoSplit.IGF1.Down	entrezgene	26273	ENSG00000110429	ENSG00000110429	26273	FBXO3
IGF1	-1	Ignatiadis2012_autoSplit.IGF1.Down	entrezgene	26509	ENSG00000138119	ENSG00000138119	26509	MYOF
IGF1	-1	Ignatiadis2012_autoSplit.IGF1.Down	entrezgene	26751	ENSG00000035115	ENSG00000035115	26751	SH3YL1
IGF1	-1	Ignatiadis2012_autoSplit.IGF1.Down	entrezgene	27010	ENSG00000196511	ENSG00000196511	27010	TPK1
IGF1	-1	Ignatiadis2012_autoSplit.IGF1.Down	entrezgene	27072	ENSG00000006715	ENSG00000006715	27072	VPS41
IGF1	-1	Ignatiadis2012_autoSplit.IGF1.Down	entrezgene	27113	ENSG00000105327	ENSG00000105327	27113	BBC3
IGF1	-1	Ignatiadis2012_autoSplit.IGF1.Down	entrezgene	27241	ENSG00000122507	ENSG00000122507	27241	BBS9
IGF1	-1	Ignatiadis2012_autoSplit.IGF1.Down	entrezgene	27250	ENSG00000150593	ENSG00000150593	27250	PDCD4
IGF1	-1	Ignatiadis2012_autoSplit.IGF1.Down	entrezgene	27316	ENSG00000147274	ENSG00000147274	27316	RBMX
IGF1	-1	Ignatiadis2012_autoSplit.IGF1.Down	entrezgene	2799	ENSG00000135677	ENSG00000135677	2799	GNS
IGF1	-1	Ignatiadis2012_autoSplit.IGF1.Down	entrezgene	2804	ENSG00000173230	ENSG00000173230	2804	GOLGB1
IGF1	-1	Ignatiadis2012_autoSplit.IGF1.Down	entrezgene	286148	ENSG00000156162	ENSG00000156162	286148	DPY19L4
IGF1	-1	Ignatiadis2012_autoSplit.IGF1.Down	entrezgene	288	ENSG00000151150	ENSG00000151150	288	ANK3
IGF1	-1	Ignatiadis2012_autoSplit.IGF1.Down	entrezgene	2888	ENSG00000115290	ENSG00000115290	2888	GRB14
IGF1	-1	Ignatiadis2012_autoSplit.IGF1.Down	entrezgene	2896	ENSG00000030582	ENSG00000030582	2896	GRN
IGF1	-1	Ignatiadis2012_autoSplit.IGF1.Down	entrezgene	28965	ENSG00000113396	ENSG00000113396	28965	SLC27A6
IGF1	-1	Ignatiadis2012_autoSplit.IGF1.Down	entrezgene	29071	ENSG00000171155	ENSG00000171155	29071	C1GALT1C1
IGF1	-1	Ignatiadis2012_autoSplit.IGF1.Down	entrezgene	29099	ENSG00000110442	ENSG00000110442	29099	COMMD9
IGF1	-1	Ignatiadis2012_autoSplit.IGF1.Down	entrezgene	29760	ENSG00000095585	--	--	--
IGF1	-1	Ignatiadis2012_autoSplit.IGF1.Down	entrezgene	29799	ENSG00000100027	ENSG00000100027	29799	YPEL1
IGF1	-1	Ignatiadis2012_autoSplit.IGF1.Down	entrezgene	29887	ENSG00000086300	ENSG00000086300	29887	SNX10
IGF1	-1	Ignatiadis2012_autoSplit.IGF1.Down	entrezgene	2990	ENSG00000169919	ENSG00000169919	2990	GUSB
IGF1	-1	Ignatiadis2012_autoSplit.IGF1.Down	entrezgene	29935	ENSG00000204086	ENSG00000204086	29935	RPA4
IGF1	-1	Ignatiadis2012_autoSplit.IGF1.Down	entrezgene	29995	ENSG00000071282	ENSG00000071282	29995	LMCD1
IGF1	-1	Ignatiadis2012_autoSplit.IGF1.Down	entrezgene	3006	ENSG00000187837	ENSG00000187837	3006	HIST1H1C
IGF1	-1	Ignatiadis2012_autoSplit.IGF1.Down	entrezgene	3012	ENSG00000277075	--	--	--
IGF1	-1	Ignatiadis2012_autoSplit.IGF1.Down	entrezgene	3017	ENSG00000158373	ENSG00000158373	3017	HIST1H2BD
IGF1	-1	Ignatiadis2012_autoSplit.IGF1.Down	entrezgene	3155	ENSG00000117305	ENSG00000117305	3155	HMGCL
IGF1	-1	Ignatiadis2012_autoSplit.IGF1.Down	entrezgene	317	ENSG00000120868	ENSG00000120868	317	APAF1
IGF1	-1	Ignatiadis2012_autoSplit.IGF1.Down	entrezgene	3176	ENSG00000150540	ENSG00000150540	3176	HNMT
IGF1	-1	Ignatiadis2012_autoSplit.IGF1.Down	entrezgene	318	ENSG00000164978	ENSG00000164978	318	NUDT2
IGF1	-1	Ignatiadis2012_autoSplit.IGF1.Down	entrezgene	328	ENSG00000100823	ENSG00000100823	328	APEX1
IGF1	-1	Ignatiadis2012_autoSplit.IGF1.Down	entrezgene	3321	ENSG00000143061	ENSG00000143061	3321	IGSF3
IGF1	-1	Ignatiadis2012_autoSplit.IGF1.Down	entrezgene	3358	ENSG00000147246	ENSG00000147246	3358	HTR2C
IGF1	-1	Ignatiadis2012_autoSplit.IGF1.Down	entrezgene	3431	ENSG00000280755 // ENSG00000135899	--	--	--
IGF1	-1	Ignatiadis2012_autoSplit.IGF1.Down	entrezgene	3476	ENSG00000089289	ENSG00000089289	3476	IGBP1
IGF1	-1	Ignatiadis2012_autoSplit.IGF1.Down	entrezgene	3554	ENSG00000115594	ENSG00000115594	3554	IL1R1
IGF1	-1	Ignatiadis2012_autoSplit.IGF1.Down	entrezgene	36	ENSG00000196177	ENSG00000196177	36	ACADSB
IGF1	-1	Ignatiadis2012_autoSplit.IGF1.Down	entrezgene	360	ENSG00000165272	ENSG00000165272	360	AQP3
IGF1	-1	Ignatiadis2012_autoSplit.IGF1.Down	entrezgene	3667	ENSG00000169047	ENSG00000169047	3667	IRS1
IGF1	-1	Ignatiadis2012_autoSplit.IGF1.Down	entrezgene	3764	ENSG00000121361	ENSG00000121361	3764	KCNJ8
IGF1	-1	Ignatiadis2012_autoSplit.IGF1.Down	entrezgene	3778	ENSG00000156113	ENSG00000156113	3778	KCNMA1
IGF1	-1	Ignatiadis2012_autoSplit.IGF1.Down	entrezgene	3781	ENSG00000080709	ENSG00000080709	3781	KCNN2
IGF1	-1	Ignatiadis2012_autoSplit.IGF1.Down	entrezgene	3797	ENSG00000084731	ENSG00000084731	3797	KIF3C
IGF1	-1	Ignatiadis2012_autoSplit.IGF1.Down	entrezgene	38	ENSG00000075239	ENSG00000075239	38	ACAT1
IGF1	-1	Ignatiadis2012_autoSplit.IGF1.Down	entrezgene	3912	ENSG00000091136	ENSG00000091136	3912	LAMB1
IGF1	-1	Ignatiadis2012_autoSplit.IGF1.Down	entrezgene	3964	ENSG00000116977	ENSG00000116977	3964	LGALS8
IGF1	-1	Ignatiadis2012_autoSplit.IGF1.Down	entrezgene	4005	ENSG00000135363	ENSG00000135363	4005	LMO2
IGF1	-1	Ignatiadis2012_autoSplit.IGF1.Down	entrezgene	4048	ENSG00000111144	ENSG00000111144	4048	LTA4H
IGF1	-1	Ignatiadis2012_autoSplit.IGF1.Down	entrezgene	4126	ENSG00000109323	ENSG00000109323	4126	MANBA
IGF1	-1	Ignatiadis2012_autoSplit.IGF1.Down	entrezgene	4128	ENSG00000189221	ENSG00000189221	4128	MAOA
IGF1	-1	Ignatiadis2012_autoSplit.IGF1.Down	entrezgene	4311	ENSG00000196549	ENSG00000196549	4311	MME
IGF1	-1	Ignatiadis2012_autoSplit.IGF1.Down	entrezgene	4329	ENSG00000119711	ENSG00000119711	4329	ALDH6A1
IGF1	-1	Ignatiadis2012_autoSplit.IGF1.Down	entrezgene	4477	ENSG00000263639	--	--	--
IGF1	-1	Ignatiadis2012_autoSplit.IGF1.Down	entrezgene	4501	ENSG00000187193	ENSG00000187193	4501	MT1X
IGF1	-1	Ignatiadis2012_autoSplit.IGF1.Down	entrezgene	4601	ENSG00000119950	ENSG00000119950	4601	MXI1
IGF1	-1	Ignatiadis2012_autoSplit.IGF1.Down	entrezgene	4602	ENSG00000118513	ENSG00000118513	4602	MYB
IGF1	-1	Ignatiadis2012_autoSplit.IGF1.Down	entrezgene	4610	ENSG00000116990	ENSG00000116990	4610	MYCL1
IGF1	-1	Ignatiadis2012_autoSplit.IGF1.Down	entrezgene	4753	ENSG00000184613	ENSG00000184613	4753	NELL2
IGF1	-1	Ignatiadis2012_autoSplit.IGF1.Down	entrezgene	4781	ENSG00000147862	ENSG00000147862	4781	NFIB
IGF1	-1	Ignatiadis2012_autoSplit.IGF1.Down	entrezgene	4886	ENSG00000164128	ENSG00000164128	4886	NPY1R
IGF1	-1	Ignatiadis2012_autoSplit.IGF1.Down	entrezgene	4889	ENSG00000164129	ENSG00000164129	4889	NPY5R
IGF1	-1	Ignatiadis2012_autoSplit.IGF1.Down	entrezgene	4982	ENSG00000164761	ENSG00000164761	4982	TNFRSF11B
IGF1	-1	Ignatiadis2012_autoSplit.IGF1.Down	entrezgene	5046	ENSG00000140479	ENSG00000140479	5046	D28514
IGF1	-1	Ignatiadis2012_autoSplit.IGF1.Down	entrezgene	5087	ENSG00000185630	ENSG00000185630	5087	PBX1
IGF1	-1	Ignatiadis2012_autoSplit.IGF1.Down	entrezgene	51019	ENSG00000120860	ENSG00000120860	51019	CCDC53
IGF1	-1	Ignatiadis2012_autoSplit.IGF1.Down	entrezgene	51084	ENSG00000165475	ENSG00000165475	51084	CRYL1
IGF1	-1	Ignatiadis2012_autoSplit.IGF1.Down	entrezgene	51172	ENSG00000103174	ENSG00000103174	51172	NAGPA
IGF1	-1	Ignatiadis2012_autoSplit.IGF1.Down	entrezgene	51227	ENSG00000185808	ENSG00000185808	51227	PIGP
IGF1	-1	Ignatiadis2012_autoSplit.IGF1.Down	entrezgene	51231	ENSG00000105053	ENSG00000105053	51231	VRK3
IGF1	-1	Ignatiadis2012_autoSplit.IGF1.Down	entrezgene	51292	ENSG00000100938	ENSG00000100938	51292	GMPR2
IGF1	-1	Ignatiadis2012_autoSplit.IGF1.Down	entrezgene	51309	ENSG00000126947	ENSG00000126947	51309	ARMCX1
IGF1	-1	Ignatiadis2012_autoSplit.IGF1.Down	entrezgene	51315	ENSG00000172086	ENSG00000172086	51315	KRCC1
IGF1	-1	Ignatiadis2012_autoSplit.IGF1.Down	entrezgene	51363	ENSG00000182022	ENSG00000182022	51363	CHST15
IGF1	-1	Ignatiadis2012_autoSplit.IGF1.Down	entrezgene	51447	ENSG00000068745	ENSG00000068745	51447	IP6K2
IGF1	-1	Ignatiadis2012_autoSplit.IGF1.Down	entrezgene	51474	ENSG00000050405	ENSG00000050405	51474	LIMA1
IGF1	-1	Ignatiadis2012_autoSplit.IGF1.Down	entrezgene	51594	ENSG00000151779	ENSG00000151779	51594	NBAS
IGF1	-1	Ignatiadis2012_autoSplit.IGF1.Down	entrezgene	51626	ENSG00000138036	ENSG00000138036	51626	DYNC2LI1
IGF1	-1	Ignatiadis2012_autoSplit.IGF1.Down	entrezgene	51646	ENSG00000119801	ENSG00000119801	51646	YPEL5
IGF1	-1	Ignatiadis2012_autoSplit.IGF1.Down	entrezgene	51696	ENSG00000112406	ENSG00000112406	51696	HECA
IGF1	-1	Ignatiadis2012_autoSplit.IGF1.Down	entrezgene	5189	ENSG00000127980	ENSG00000127980	5189	PEX1
IGF1	-1	Ignatiadis2012_autoSplit.IGF1.Down	entrezgene	5238	ENSG00000013375	ENSG00000013375	5238	PGM3
IGF1	-1	Ignatiadis2012_autoSplit.IGF1.Down	entrezgene	5290	ENSG00000121879	ENSG00000121879	5290	PIK3CA
IGF1	-1	Ignatiadis2012_autoSplit.IGF1.Down	entrezgene	5334	ENSG00000115896	ENSG00000115896	5334	PLCL1
IGF1	-1	Ignatiadis2012_autoSplit.IGF1.Down	entrezgene	5349	ENSG00000089356	ENSG00000089356	5349	FXYD3
IGF1	-1	Ignatiadis2012_autoSplit.IGF1.Down	entrezgene	5376	ENSG00000109099	ENSG00000109099	5376	PMP22
IGF1	-1	Ignatiadis2012_autoSplit.IGF1.Down	entrezgene	54014	ENSG00000185658	ENSG00000185658	54014	BRWD1
IGF1	-1	Ignatiadis2012_autoSplit.IGF1.Down	entrezgene	54453	ENSG00000132669	ENSG00000132669	54453	RIN2
IGF1	-1	Ignatiadis2012_autoSplit.IGF1.Down	entrezgene	54621	ENSG00000176834	ENSG00000176834	54621	VSIG10
IGF1	-1	Ignatiadis2012_autoSplit.IGF1.Down	entrezgene	54665	ENSG00000081019	ENSG00000081019	54665	RSBN1
IGF1	-1	Ignatiadis2012_autoSplit.IGF1.Down	entrezgene	54769	ENSG00000165023	ENSG00000165023	54769	DIRAS2
IGF1	-1	Ignatiadis2012_autoSplit.IGF1.Down	entrezgene	54800	ENSG00000114796	ENSG00000114796	54800	KLHL24
IGF1	-1	Ignatiadis2012_autoSplit.IGF1.Down	entrezgene	54816	ENSG00000137871	ENSG00000137871	54816	ZNF280D
IGF1	-1	Ignatiadis2012_autoSplit.IGF1.Down	entrezgene	54898	ENSG00000197977	ENSG00000197977	54898	ELOVL2
IGF1	-1	Ignatiadis2012_autoSplit.IGF1.Down	entrezgene	549	ENSG00000148090	ENSG00000148090	549	AUH
IGF1	-1	Ignatiadis2012_autoSplit.IGF1.Down	entrezgene	54974	ENSG00000113272	ENSG00000113272	54974	THG1L
IGF1	-1	Ignatiadis2012_autoSplit.IGF1.Down	entrezgene	5498	ENSG00000143224	ENSG00000143224	5498	PPOX
IGF1	-1	Ignatiadis2012_autoSplit.IGF1.Down	entrezgene	55008	ENSG00000138642	ENSG00000138642	55008	HERC6
IGF1	-1	Ignatiadis2012_autoSplit.IGF1.Down	entrezgene	55062	ENSG00000070540	ENSG00000070540	55062	WIPI1
IGF1	-1	Ignatiadis2012_autoSplit.IGF1.Down	entrezgene	55100	ENSG00000082068	ENSG00000082068	55100	WDR70
IGF1	-1	Ignatiadis2012_autoSplit.IGF1.Down	entrezgene	55196	ENSG00000174718	ENSG00000174718	55196	C12orf35
IGF1	-1	Ignatiadis2012_autoSplit.IGF1.Down	entrezgene	55204	ENSG00000143457	ENSG00000143457	55204	GOLPH3L
IGF1	-1	Ignatiadis2012_autoSplit.IGF1.Down	entrezgene	55213	ENSG00000136144	ENSG00000136144	55213	RCBTB1
IGF1	-1	Ignatiadis2012_autoSplit.IGF1.Down	entrezgene	55218	ENSG00000081177	ENSG00000081177	55218	EXD2
IGF1	-1	Ignatiadis2012_autoSplit.IGF1.Down	entrezgene	55296	ENSG00000109680	ENSG00000109680	55296	TBC1D19
IGF1	-1	Ignatiadis2012_autoSplit.IGF1.Down	entrezgene	55315	ENSG00000198246	--	--	--
IGF1	-1	Ignatiadis2012_autoSplit.IGF1.Down	entrezgene	55332	ENSG00000136048	--	--	--
IGF1	-1	Ignatiadis2012_autoSplit.IGF1.Down	entrezgene	5538	ENSG00000131238	ENSG00000131238	5538	PPT1
IGF1	-1	Ignatiadis2012_autoSplit.IGF1.Down	entrezgene	5547	ENSG00000137509	ENSG00000137509	5547	PRCP
IGF1	-1	Ignatiadis2012_autoSplit.IGF1.Down	entrezgene	55501	ENSG00000136213	ENSG00000136213	55501	CHST12
IGF1	-1	Ignatiadis2012_autoSplit.IGF1.Down	entrezgene	55510	ENSG00000080007	ENSG00000080007	55510	DDX43
IGF1	-1	Ignatiadis2012_autoSplit.IGF1.Down	entrezgene	55625	ENSG00000153786	ENSG00000153786	55625	ZDHHC7
IGF1	-1	Ignatiadis2012_autoSplit.IGF1.Down	entrezgene	55742	ENSG00000197702	ENSG00000197702	55742	PARVA
IGF1	-1	Ignatiadis2012_autoSplit.IGF1.Down	entrezgene	55763	ENSG00000090989	ENSG00000090989	55763	EXOC1
IGF1	-1	Ignatiadis2012_autoSplit.IGF1.Down	entrezgene	55788	ENSG00000168216	ENSG00000168216	55788	LMBRD1
IGF1	-1	Ignatiadis2012_autoSplit.IGF1.Down	entrezgene	55793	ENSG00000143409	ENSG00000143409	55793	FAM63A
IGF1	-1	Ignatiadis2012_autoSplit.IGF1.Down	entrezgene	55812	ENSG00000042317	ENSG00000042317	55812	SPATA7
IGF1	-1	Ignatiadis2012_autoSplit.IGF1.Down	entrezgene	55818	ENSG00000115548	ENSG00000115548	55818	KDM3A
IGF1	-1	Ignatiadis2012_autoSplit.IGF1.Down	entrezgene	55827	ENSG00000143164	ENSG00000143164	55827	DCAF6
IGF1	-1	Ignatiadis2012_autoSplit.IGF1.Down	entrezgene	55830	ENSG00000016864	ENSG00000016864	55830	GLT8D1
IGF1	-1	Ignatiadis2012_autoSplit.IGF1.Down	entrezgene	55837	ENSG00000129518	ENSG00000129518	55837	EAPP
IGF1	-1	Ignatiadis2012_autoSplit.IGF1.Down	entrezgene	55857	ENSG00000088970	--	--	--
IGF1	-1	Ignatiadis2012_autoSplit.IGF1.Down	entrezgene	55900	ENSG00000089335	ENSG00000089335	55900	ZNF302
IGF1	-1	Ignatiadis2012_autoSplit.IGF1.Down	entrezgene	5627	ENSG00000184500	ENSG00000184500	5627	PROS1
IGF1	-1	Ignatiadis2012_autoSplit.IGF1.Down	entrezgene	56603	ENSG00000003137	ENSG00000003137	56603	CYP26B1
IGF1	-1	Ignatiadis2012_autoSplit.IGF1.Down	entrezgene	56898	ENSG00000164039	ENSG00000164039	56898	BDH2
IGF1	-1	Ignatiadis2012_autoSplit.IGF1.Down	entrezgene	56922	ENSG00000078070	ENSG00000078070	56922	MCCC1
IGF1	-1	Ignatiadis2012_autoSplit.IGF1.Down	entrezgene	56997	ENSG00000163050	ENSG00000163050	56997	ADCK3
IGF1	-1	Ignatiadis2012_autoSplit.IGF1.Down	entrezgene	57007	ENSG00000144476	ENSG00000144476	57007	CXCR7
IGF1	-1	Ignatiadis2012_autoSplit.IGF1.Down	entrezgene	57088	ENSG00000114698	ENSG00000114698	57088	PLSCR4
IGF1	-1	Ignatiadis2012_autoSplit.IGF1.Down	entrezgene	57326	ENSG00000163346	ENSG00000163346	57326	PBXIP1
IGF1	-1	Ignatiadis2012_autoSplit.IGF1.Down	entrezgene	5733	ENSG00000050628	ENSG00000050628	5733	PTGER3
IGF1	-1	Ignatiadis2012_autoSplit.IGF1.Down	entrezgene	5734	ENSG00000171522	ENSG00000171522	5734	PTGER4
IGF1	-1	Ignatiadis2012_autoSplit.IGF1.Down	entrezgene	57419	ENSG00000185052	ENSG00000185052	57419	SLC24A3
IGF1	-1	Ignatiadis2012_autoSplit.IGF1.Down	entrezgene	57509	ENSG00000129422	ENSG00000129422	57509	MTUS1
IGF1	-1	Ignatiadis2012_autoSplit.IGF1.Down	entrezgene	57515	ENSG00000111897	ENSG00000111897	57515	SERINC1
IGF1	-1	Ignatiadis2012_autoSplit.IGF1.Down	entrezgene	57599	ENSG00000114742	ENSG00000114742	57599	WDR48
IGF1	-1	Ignatiadis2012_autoSplit.IGF1.Down	entrezgene	5771	ENSG00000175354	ENSG00000175354	5771	PTPN2
IGF1	-1	Ignatiadis2012_autoSplit.IGF1.Down	entrezgene	57728	ENSG00000157796	ENSG00000157796	57728	WDR19
IGF1	-1	Ignatiadis2012_autoSplit.IGF1.Down	entrezgene	57758	ENSG00000175356	ENSG00000175356	57758	SCUBE2
IGF1	-1	Ignatiadis2012_autoSplit.IGF1.Down	entrezgene	57763	ENSG00000164331	ENSG00000164331	57763	ANKRA2
IGF1	-1	Ignatiadis2012_autoSplit.IGF1.Down	entrezgene	5783	ENSG00000163629	ENSG00000163629	5783	PTPN13
IGF1	-1	Ignatiadis2012_autoSplit.IGF1.Down	entrezgene	5826	ENSG00000119688	ENSG00000119688	5826	ABCD4
IGF1	-1	Ignatiadis2012_autoSplit.IGF1.Down	entrezgene	58488	ENSG00000141179	ENSG00000141179	58488	PCTP
IGF1	-1	Ignatiadis2012_autoSplit.IGF1.Down	entrezgene	58497	ENSG00000143363	ENSG00000143363	58497	PRUNE
IGF1	-1	Ignatiadis2012_autoSplit.IGF1.Down	entrezgene	5926	ENSG00000032219	ENSG00000032219	5926	ARID4A
IGF1	-1	Ignatiadis2012_autoSplit.IGF1.Down	entrezgene	59348	ENSG00000256683	ENSG00000256683	59348	ZNF350
IGF1	-1	Ignatiadis2012_autoSplit.IGF1.Down	entrezgene	596	ENSG00000171791	ENSG00000171791	596	BCL2
IGF1	-1	Ignatiadis2012_autoSplit.IGF1.Down	entrezgene	5993	ENSG00000143390	ENSG00000143390	5993	RFX5
IGF1	-1	Ignatiadis2012_autoSplit.IGF1.Down	entrezgene	6019	ENSG00000107014	ENSG00000107014	6019	RLN2
IGF1	-1	Ignatiadis2012_autoSplit.IGF1.Down	entrezgene	6038	ENSG00000258818	--	--	--
IGF1	-1	Ignatiadis2012_autoSplit.IGF1.Down	entrezgene	604	ENSG00000113916	ENSG00000113916	604	BCL6
IGF1	-1	Ignatiadis2012_autoSplit.IGF1.Down	entrezgene	60686	ENSG00000100802	ENSG00000100802	60686	C14orf93
IGF1	-1	Ignatiadis2012_autoSplit.IGF1.Down	entrezgene	6253	ENSG00000125744	ENSG00000125744	6253	RTN2
IGF1	-1	Ignatiadis2012_autoSplit.IGF1.Down	entrezgene	638	ENSG00000100290	ENSG00000100290	638	BIK
IGF1	-1	Ignatiadis2012_autoSplit.IGF1.Down	entrezgene	63892	ENSG00000115970	ENSG00000115970	63892	THADA
IGF1	-1	Ignatiadis2012_autoSplit.IGF1.Down	entrezgene	63897	ENSG00000068097	ENSG00000068097	63897	HEATR6
IGF1	-1	Ignatiadis2012_autoSplit.IGF1.Down	entrezgene	63901	ENSG00000166801	ENSG00000166801	63901	FAM111A
IGF1	-1	Ignatiadis2012_autoSplit.IGF1.Down	entrezgene	63920	ENSG00000221886	ENSG00000221886	63920	C5orf54
IGF1	-1	Ignatiadis2012_autoSplit.IGF1.Down	entrezgene	6414	ENSG00000250722	ENSG00000250722	6414	SEPP1
IGF1	-1	Ignatiadis2012_autoSplit.IGF1.Down	entrezgene	64430	ENSG00000126773	ENSG00000126773	64430	C14orf135
IGF1	-1	Ignatiadis2012_autoSplit.IGF1.Down	entrezgene	64786	ENSG00000121749	ENSG00000121749	64786	TBC1D15
IGF1	-1	Ignatiadis2012_autoSplit.IGF1.Down	entrezgene	64798	ENSG00000155792	ENSG00000155792	64798	DEPTOR
IGF1	-1	Ignatiadis2012_autoSplit.IGF1.Down	entrezgene	64927	ENSG00000103852	ENSG00000103852	64927	TTC23
IGF1	-1	Ignatiadis2012_autoSplit.IGF1.Down	entrezgene	65018	ENSG00000158828	ENSG00000158828	65018	PINK1
IGF1	-1	Ignatiadis2012_autoSplit.IGF1.Down	entrezgene	65084	ENSG00000166575	ENSG00000166575	65084	TMEM135
IGF1	-1	Ignatiadis2012_autoSplit.IGF1.Down	entrezgene	6642	ENSG00000028528	ENSG00000028528	6642	SNX1
IGF1	-1	Ignatiadis2012_autoSplit.IGF1.Down	entrezgene	665	ENSG00000104765	ENSG00000104765	665	BNIP3L
IGF1	-1	Ignatiadis2012_autoSplit.IGF1.Down	entrezgene	6658	ENSG00000134595	ENSG00000134595	6658	SOX3
IGF1	-1	Ignatiadis2012_autoSplit.IGF1.Down	entrezgene	6672	ENSG00000067066	ENSG00000067066	6672	SP100
IGF1	-1	Ignatiadis2012_autoSplit.IGF1.Down	entrezgene	6814	ENSG00000116266	ENSG00000116266	6814	STXBP3
IGF1	-1	Ignatiadis2012_autoSplit.IGF1.Down	entrezgene	694	ENSG00000133639	ENSG00000133639	694	BTG1
IGF1	-1	Ignatiadis2012_autoSplit.IGF1.Down	entrezgene	7026	ENSG00000185551	ENSG00000185551	7026	NR2F2
IGF1	-1	Ignatiadis2012_autoSplit.IGF1.Down	entrezgene	7035	ENSG00000003436	ENSG00000003436	7035	TFPI
IGF1	-1	Ignatiadis2012_autoSplit.IGF1.Down	entrezgene	7045	ENSG00000120708	ENSG00000120708	7045	TGFBI
IGF1	-1	Ignatiadis2012_autoSplit.IGF1.Down	entrezgene	7078	ENSG00000100234	ENSG00000100234	7078	TIMP3
IGF1	-1	Ignatiadis2012_autoSplit.IGF1.Down	entrezgene	7107	ENSG00000077585	ENSG00000077585	7107	GPR137B
IGF1	-1	Ignatiadis2012_autoSplit.IGF1.Down	entrezgene	7181	ENSG00000120798	ENSG00000120798	7181	NR2C1
IGF1	-1	Ignatiadis2012_autoSplit.IGF1.Down	entrezgene	7306	ENSG00000107165	ENSG00000107165	7306	TYRP1
IGF1	-1	Ignatiadis2012_autoSplit.IGF1.Down	entrezgene	7456	ENSG00000115935	ENSG00000115935	7456	WIPF1
IGF1	-1	Ignatiadis2012_autoSplit.IGF1.Down	entrezgene	7508	ENSG00000154767	ENSG00000154767	7508	XPC
IGF1	-1	Ignatiadis2012_autoSplit.IGF1.Down	entrezgene	753	ENSG00000168675	ENSG00000168675	753	C18orf1
IGF1	-1	Ignatiadis2012_autoSplit.IGF1.Down	entrezgene	7580	ENSG00000169740	ENSG00000169740	7580	ZNF32
IGF1	-1	Ignatiadis2012_autoSplit.IGF1.Down	entrezgene	7770	ENSG00000131115	ENSG00000131115	7770	ZNF227
IGF1	-1	Ignatiadis2012_autoSplit.IGF1.Down	entrezgene	7844	ENSG00000239305	--	--	--
IGF1	-1	Ignatiadis2012_autoSplit.IGF1.Down	entrezgene	7852	ENSG00000121966	ENSG00000121966	7852	CXCR4
IGF1	-1	Ignatiadis2012_autoSplit.IGF1.Down	entrezgene	79083	ENSG00000115648	ENSG00000115648	79083	MLPH
IGF1	-1	Ignatiadis2012_autoSplit.IGF1.Down	entrezgene	79090	ENSG00000007255	ENSG00000007255	79090	TRAPPC6A
IGF1	-1	Ignatiadis2012_autoSplit.IGF1.Down	entrezgene	79443	ENSG00000163820	ENSG00000163820	79443	FYCO1
IGF1	-1	Ignatiadis2012_autoSplit.IGF1.Down	entrezgene	79611	ENSG00000111058	ENSG00000111058	79611	ACSS3
IGF1	-1	Ignatiadis2012_autoSplit.IGF1.Down	entrezgene	79664	ENSG00000128915	ENSG00000128915	79664	NARG2
IGF1	-1	Ignatiadis2012_autoSplit.IGF1.Down	entrezgene	79665	ENSG00000108406	ENSG00000108406	79665	DHX40
IGF1	-1	Ignatiadis2012_autoSplit.IGF1.Down	entrezgene	79738	ENSG00000179941	ENSG00000179941	79738	BBS10
IGF1	-1	Ignatiadis2012_autoSplit.IGF1.Down	entrezgene	79762	ENSG00000162817	ENSG00000162817	79762	C1orf115
IGF1	-1	Ignatiadis2012_autoSplit.IGF1.Down	entrezgene	79789	ENSG00000165959	ENSG00000165959	79789	CLMN
IGF1	-1	Ignatiadis2012_autoSplit.IGF1.Down	entrezgene	79864	ENSG00000109944	ENSG00000109944	79864	C11orf63
IGF1	-1	Ignatiadis2012_autoSplit.IGF1.Down	entrezgene	79901	ENSG00000071967	ENSG00000071967	79901	CYBRD1
IGF1	-1	Ignatiadis2012_autoSplit.IGF1.Down	entrezgene	79983	ENSG00000124429	ENSG00000124429	79983	POF1B
IGF1	-1	Ignatiadis2012_autoSplit.IGF1.Down	entrezgene	80195	ENSG00000133678	ENSG00000133678	80195	C10orf57
IGF1	-1	Ignatiadis2012_autoSplit.IGF1.Down	entrezgene	80230	ENSG00000176783	ENSG00000176783	80230	RUFY1
IGF1	-1	Ignatiadis2012_autoSplit.IGF1.Down	entrezgene	80254	ENSG00000182923	ENSG00000182923	80254	CEP63
IGF1	-1	Ignatiadis2012_autoSplit.IGF1.Down	entrezgene	80303	ENSG00000115468	ENSG00000115468	80303	EFHD1
IGF1	-1	Ignatiadis2012_autoSplit.IGF1.Down	entrezgene	8031	ENSG00000266412	--	--	--
IGF1	-1	Ignatiadis2012_autoSplit.IGF1.Down	entrezgene	80344	ENSG00000100897	ENSG00000100897	80344	DCAF11
IGF1	-1	Ignatiadis2012_autoSplit.IGF1.Down	entrezgene	80853	ENSG00000006459	ENSG00000006459	80853	JHDM1D
IGF1	-1	Ignatiadis2012_autoSplit.IGF1.Down	entrezgene	81031	ENSG00000197496	ENSG00000197496	81031	SLC2A10
IGF1	-1	Ignatiadis2012_autoSplit.IGF1.Down	entrezgene	81578	ENSG00000124749	ENSG00000124749	81578	COL21A1
IGF1	-1	Ignatiadis2012_autoSplit.IGF1.Down	entrezgene	81603	ENSG00000171206	ENSG00000171206	81603	TRIM8
IGF1	-1	Ignatiadis2012_autoSplit.IGF1.Down	entrezgene	81627	ENSG00000121486	ENSG00000121486	81627	TRMT1L
IGF1	-1	Ignatiadis2012_autoSplit.IGF1.Down	entrezgene	8204	ENSG00000180530	ENSG00000180530	8204	NRIP1
IGF1	-1	Ignatiadis2012_autoSplit.IGF1.Down	entrezgene	8269	ENSG00000177854	ENSG00000177854	8269	TMEM187
IGF1	-1	Ignatiadis2012_autoSplit.IGF1.Down	entrezgene	831	ENSG00000153113	ENSG00000153113	831	CAST
IGF1	-1	Ignatiadis2012_autoSplit.IGF1.Down	entrezgene	8339	ENSG00000273802	--	--	--
IGF1	-1	Ignatiadis2012_autoSplit.IGF1.Down	entrezgene	83439	ENSG00000152284	ENSG00000152284	83439	TCF7L1
IGF1	-1	Ignatiadis2012_autoSplit.IGF1.Down	entrezgene	84124	ENSG00000160908	ENSG00000160908	84124	ZNF394
IGF1	-1	Ignatiadis2012_autoSplit.IGF1.Down	entrezgene	84159	ENSG00000150347	ENSG00000150347	84159	ARID5B
IGF1	-1	Ignatiadis2012_autoSplit.IGF1.Down	entrezgene	8481	ENSG00000046651	ENSG00000046651	8481	OFD1
IGF1	-1	Ignatiadis2012_autoSplit.IGF1.Down	entrezgene	8502	ENSG00000144283	ENSG00000144283	8502	PKP4
IGF1	-1	Ignatiadis2012_autoSplit.IGF1.Down	entrezgene	8519	ENSG00000185885	ENSG00000185885	8519	IFITM1
IGF1	-1	Ignatiadis2012_autoSplit.IGF1.Down	entrezgene	857	ENSG00000105974	ENSG00000105974	857	CAV1
IGF1	-1	Ignatiadis2012_autoSplit.IGF1.Down	entrezgene	8613	ENSG00000162407	ENSG00000162407	8613	PPAP2B
IGF1	-1	Ignatiadis2012_autoSplit.IGF1.Down	entrezgene	8630	ENSG00000025423	ENSG00000025423	8630	HSD17B6
IGF1	-1	Ignatiadis2012_autoSplit.IGF1.Down	entrezgene	8660	ENSG00000185950	ENSG00000185950	8660	IRS2
IGF1	-1	Ignatiadis2012_autoSplit.IGF1.Down	entrezgene	8705	ENSG00000235863	--	--	--
IGF1	-1	Ignatiadis2012_autoSplit.IGF1.Down	entrezgene	8720	ENSG00000140943	ENSG00000140943	8720	MBTPS1
IGF1	-1	Ignatiadis2012_autoSplit.IGF1.Down	entrezgene	8722	ENSG00000174080	ENSG00000174080	8722	CTSF
IGF1	-1	Ignatiadis2012_autoSplit.IGF1.Down	entrezgene	8800	ENSG00000166821	ENSG00000166821	8800	PEX11A
IGF1	-1	Ignatiadis2012_autoSplit.IGF1.Down	entrezgene	8835	ENSG00000120833	ENSG00000120833	8835	SOCS2
IGF1	-1	Ignatiadis2012_autoSplit.IGF1.Down	entrezgene	8934	ENSG00000117280	ENSG00000117280	8934	RAB7L1
IGF1	-1	Ignatiadis2012_autoSplit.IGF1.Down	entrezgene	8991	ENSG00000143416	ENSG00000143416	8991	SELENBP1
IGF1	-1	Ignatiadis2012_autoSplit.IGF1.Down	entrezgene	89910	ENSG00000151148	ENSG00000151148	89910	UBE3B
IGF1	-1	Ignatiadis2012_autoSplit.IGF1.Down	entrezgene	9	ENSG00000171428	ENSG00000171428	9	NAT1
IGF1	-1	Ignatiadis2012_autoSplit.IGF1.Down	entrezgene	900	ENSG00000113328	ENSG00000113328	900	CCNG1
IGF1	-1	Ignatiadis2012_autoSplit.IGF1.Down	entrezgene	901	ENSG00000138764	ENSG00000138764	901	CCNG2
IGF1	-1	Ignatiadis2012_autoSplit.IGF1.Down	entrezgene	90362	ENSG00000169122	ENSG00000169122	90362	FAM110B
IGF1	-1	Ignatiadis2012_autoSplit.IGF1.Down	entrezgene	90864	ENSG00000162032	ENSG00000162032	90864	SPSB3
IGF1	-1	Ignatiadis2012_autoSplit.IGF1.Down	entrezgene	9111	ENSG00000123609	ENSG00000123609	9111	NMI
IGF1	-1	Ignatiadis2012_autoSplit.IGF1.Down	entrezgene	9185	ENSG00000169891	ENSG00000169891	9185	REPS2
IGF1	-1	Ignatiadis2012_autoSplit.IGF1.Down	entrezgene	9187	ENSG00000074621	ENSG00000074621	9187	SLC24A1
IGF1	-1	Ignatiadis2012_autoSplit.IGF1.Down	entrezgene	9204	ENSG00000163867	ENSG00000163867	9204	ZMYM6
IGF1	-1	Ignatiadis2012_autoSplit.IGF1.Down	entrezgene	9236	ENSG00000260916	--	--	--
IGF1	-1	Ignatiadis2012_autoSplit.IGF1.Down	entrezgene	93129	ENSG00000175938	ENSG00000175938	93129	ORAI3
IGF1	-1	Ignatiadis2012_autoSplit.IGF1.Down	entrezgene	9337	ENSG00000155508	ENSG00000155508	9337	CNOT8
IGF1	-1	Ignatiadis2012_autoSplit.IGF1.Down	entrezgene	9338	ENSG00000172465	ENSG00000172465	9338	TCEAL1
IGF1	-1	Ignatiadis2012_autoSplit.IGF1.Down	entrezgene	9367	ENSG00000123595	ENSG00000123595	9367	RAB9A
IGF1	-1	Ignatiadis2012_autoSplit.IGF1.Down	entrezgene	9419	ENSG00000119878	ENSG00000119878	9419	CRIPT
IGF1	-1	Ignatiadis2012_autoSplit.IGF1.Down	entrezgene	9439	ENSG00000112282	ENSG00000112282	9439	MED23
IGF1	-1	Ignatiadis2012_autoSplit.IGF1.Down	entrezgene	9444	ENSG00000112531	ENSG00000112531	9444	QKI
IGF1	-1	Ignatiadis2012_autoSplit.IGF1.Down	entrezgene	9445	ENSG00000136156	ENSG00000136156	9445	ITM2B
IGF1	-1	Ignatiadis2012_autoSplit.IGF1.Down	entrezgene	9467	ENSG00000131370	ENSG00000131370	9467	SH3BP5
IGF1	-1	Ignatiadis2012_autoSplit.IGF1.Down	entrezgene	9512	ENSG00000105819	ENSG00000105819	9512	PMPCB
IGF1	-1	Ignatiadis2012_autoSplit.IGF1.Down	entrezgene	9517	ENSG00000100596	ENSG00000100596	9517	SPTLC2
IGF1	-1	Ignatiadis2012_autoSplit.IGF1.Down	entrezgene	9525	ENSG00000119541	ENSG00000119541	9525	VPS4B
IGF1	-1	Ignatiadis2012_autoSplit.IGF1.Down	entrezgene	9528	ENSG00000116209	ENSG00000116209	9528	TMEM59
IGF1	-1	Ignatiadis2012_autoSplit.IGF1.Down	entrezgene	9630	ENSG00000156049	ENSG00000156049	9630	GNA14
IGF1	-1	Ignatiadis2012_autoSplit.IGF1.Down	entrezgene	9638	ENSG00000149557	ENSG00000149557	9638	FEZ1
IGF1	-1	Ignatiadis2012_autoSplit.IGF1.Down	entrezgene	9649	ENSG00000136828	ENSG00000136828	9649	RALGPS1
IGF1	-1	Ignatiadis2012_autoSplit.IGF1.Down	entrezgene	9665	ENSG00000166783	ENSG00000166783	9665	KIAA0430
IGF1	-1	Ignatiadis2012_autoSplit.IGF1.Down	entrezgene	9743	ENSG00000134909	ENSG00000134909	9743	ARHGAP32
IGF1	-1	Ignatiadis2012_autoSplit.IGF1.Down	entrezgene	9764	ENSG00000135709	ENSG00000135709	9764	KIAA0513
IGF1	-1	Ignatiadis2012_autoSplit.IGF1.Down	entrezgene	9766	ENSG00000100647	ENSG00000100647	9766	KIAA0247
IGF1	-1	Ignatiadis2012_autoSplit.IGF1.Down	entrezgene	9767	ENSG00000102221	ENSG00000102221	9767	PHF16
IGF1	-1	Ignatiadis2012_autoSplit.IGF1.Down	entrezgene	9772	ENSG00000177728	ENSG00000177728	9772	KIAA0195
IGF1	-1	Ignatiadis2012_autoSplit.IGF1.Down	entrezgene	9779	ENSG00000131374	ENSG00000131374	9779	TBC1D5
IGF1	-1	Ignatiadis2012_autoSplit.IGF1.Down	entrezgene	9821	ENSG00000023287	ENSG00000023287	9821	RB1CC1
IGF1	-1	Ignatiadis2012_autoSplit.IGF1.Down	entrezgene	9847	ENSG00000111731	ENSG00000111731	9847	KIAA0528
IGF1	-1	Ignatiadis2012_autoSplit.IGF1.Down	entrezgene	9886	ENSG00000072422	ENSG00000072422	9886	RHOBTB1
IGF1	-1	Ignatiadis2012_autoSplit.IGF1.Down	entrezgene	9906	ENSG00000189339 // ENSG00000215790	--	--	--
IGF1	-1	Ignatiadis2012_autoSplit.IGF1.Down	entrezgene	9936	ENSG00000241399	--	--	--
IGF1	-1	Ignatiadis2012_autoSplit.IGF1.Down	entrezgene	9946	ENSG00000205758	ENSG00000205758	9946	CRYZL1
Immune1	1	Ignatiadis2012_autoSplit.Immune1.Up	entrezgene	3134	ENSG00000204642	--	--	--
Immune1	1	Ignatiadis2012_autoSplit.Immune1.Up	entrezgene	4063	ENSG00000122224	ENSG00000122224	4063	LY9
Immune1	1	Ignatiadis2012_autoSplit.Immune1.Up	entrezgene	608	ENSG00000048462	ENSG00000048462	608	TNFRSF17
Immune1	1	Ignatiadis2012_autoSplit.Immune1.Up	entrezgene	6846	ENSG00000143185	--	--	--
Immune1	1	Ignatiadis2012_autoSplit.Immune1.Up	entrezgene	712	ENSG00000173372	ENSG00000173372	712	C1QA
Immune1	-1	Ignatiadis2012_autoSplit.Immune1.Down	entrezgene	6696	ENSG00000118785	ENSG00000118785	6696	SPP1
Immune2	1	Ignatiadis2012_autoSplit.Immune2.Up	entrezgene	10125	ENSG00000172575	ENSG00000172575	10125	RASGRP1
Immune2	1	Ignatiadis2012_autoSplit.Immune2.Up	entrezgene	10148	ENSG00000105246	ENSG00000105246	10148	EBI3
Immune2	1	Ignatiadis2012_autoSplit.Immune2.Up	entrezgene	10261	ENSG00000140749	ENSG00000140749	10261	IGSF6
Immune2	1	Ignatiadis2012_autoSplit.Immune2.Up	entrezgene	10346	ENSG00000132274	ENSG00000132274	10346	TRIM22
Immune2	1	Ignatiadis2012_autoSplit.Immune2.Up	entrezgene	10437	ENSG00000216490	ENSG00000216490	10437	IFI30
Immune2	1	Ignatiadis2012_autoSplit.Immune2.Up	entrezgene	10537	ENSG00000213886	--	--	--
Immune2	1	Ignatiadis2012_autoSplit.Immune2.Up	entrezgene	1075	ENSG00000109861	ENSG00000109861	1075	CTSC
Immune2	1	Ignatiadis2012_autoSplit.Immune2.Up	entrezgene	10866	ENSG00000206337	--	--	--
Immune2	1	Ignatiadis2012_autoSplit.Immune2.Up	entrezgene	10875	ENSG00000127951	ENSG00000127951	10875	FGL2
Immune2	1	Ignatiadis2012_autoSplit.Immune2.Up	entrezgene	10964	ENSG00000137959	ENSG00000137959	10964	IFI44L
Immune2	1	Ignatiadis2012_autoSplit.Immune2.Up	entrezgene	11040	ENSG00000102096	ENSG00000102096	11040	PIM2
Immune2	1	Ignatiadis2012_autoSplit.Immune2.Up	entrezgene	11118	ENSG00000186470	ENSG00000186470	11118	BTN3A2
Immune2	1	Ignatiadis2012_autoSplit.Immune2.Up	entrezgene	11262	ENSG00000079263	ENSG00000079263	11262	SP140
Immune2	1	Ignatiadis2012_autoSplit.Immune2.Up	entrezgene	1880	ENSG00000169508	ENSG00000169508	1880	GPR183
Immune2	1	Ignatiadis2012_autoSplit.Immune2.Up	entrezgene	1890	ENSG00000025708	ENSG00000025708	1890	TYMP
Immune2	1	Ignatiadis2012_autoSplit.Immune2.Up	entrezgene	22797	ENSG00000105967	ENSG00000105967	22797	TFEC
Immune2	1	Ignatiadis2012_autoSplit.Immune2.Up	entrezgene	22914	ENSG00000213809	--	--	--
Immune2	1	Ignatiadis2012_autoSplit.Immune2.Up	entrezgene	23547	ENSG00000239961	--	--	--
Immune2	1	Ignatiadis2012_autoSplit.Immune2.Up	entrezgene	23586	ENSG00000107201	ENSG00000107201	23586	DDX58
Immune2	1	Ignatiadis2012_autoSplit.Immune2.Up	entrezgene	24138	ENSG00000152778	ENSG00000152778	24138	IFIT5
Immune2	1	Ignatiadis2012_autoSplit.Immune2.Up	entrezgene	2537	ENSG00000126709	ENSG00000126709	2537	IFI6
Immune2	1	Ignatiadis2012_autoSplit.Immune2.Up	entrezgene	26034	ENSG00000074706	ENSG00000074706	26034	IPCEF1
Immune2	1	Ignatiadis2012_autoSplit.Immune2.Up	entrezgene	27074	ENSG00000078081	ENSG00000078081	27074	LAMP3
Immune2	1	Ignatiadis2012_autoSplit.Immune2.Up	entrezgene	27299	ENSG00000134028	ENSG00000134028	27299	ADAMDEC1
Immune2	1	Ignatiadis2012_autoSplit.Immune2.Up	entrezgene	2841	ENSG00000125245	ENSG00000125245	2841	GPR18
Immune2	1	Ignatiadis2012_autoSplit.Immune2.Up	entrezgene	29887	ENSG00000086300	ENSG00000086300	29887	SNX10
Immune2	1	Ignatiadis2012_autoSplit.Immune2.Up	entrezgene	29909	ENSG00000174946	ENSG00000174946	29909	GPR171
Immune2	1	Ignatiadis2012_autoSplit.Immune2.Up	entrezgene	3003	ENSG00000113088	ENSG00000113088	3003	GZMK
Immune2	1	Ignatiadis2012_autoSplit.Immune2.Up	entrezgene	3059	ENSG00000180353	ENSG00000180353	3059	HCLS1
Immune2	1	Ignatiadis2012_autoSplit.Immune2.Up	entrezgene	330	ENSG00000023445	ENSG00000023445	330	BIRC3
Immune2	1	Ignatiadis2012_autoSplit.Immune2.Up	entrezgene	3394	ENSG00000140968	ENSG00000140968	3394	IRF8
Immune2	1	Ignatiadis2012_autoSplit.Immune2.Up	entrezgene	341	ENSG00000130208	ENSG00000130208	341	APOC1
Immune2	1	Ignatiadis2012_autoSplit.Immune2.Up	entrezgene	3437	ENSG00000119917	ENSG00000119917	3437	IFIT3
Immune2	1	Ignatiadis2012_autoSplit.Immune2.Up	entrezgene	356	ENSG00000117560	ENSG00000117560	356	FASLG
Immune2	1	Ignatiadis2012_autoSplit.Immune2.Up	entrezgene	3606	ENSG00000150782	ENSG00000150782	3606	IL18
Immune2	1	Ignatiadis2012_autoSplit.Immune2.Up	entrezgene	3620	ENSG00000131203	ENSG00000131203	3620	IDO1
Immune2	1	Ignatiadis2012_autoSplit.Immune2.Up	entrezgene	3627	ENSG00000169245	ENSG00000169245	3627	CXCL10
Immune2	1	Ignatiadis2012_autoSplit.Immune2.Up	entrezgene	3659	ENSG00000125347	ENSG00000125347	3659	IRF1
Immune2	1	Ignatiadis2012_autoSplit.Immune2.Up	entrezgene	3689	ENSG00000160255	ENSG00000160255	3689	ITGB2
Immune2	1	Ignatiadis2012_autoSplit.Immune2.Up	entrezgene	3823	ENSG00000205810	ENSG00000205810	3823	KLRC3
Immune2	1	Ignatiadis2012_autoSplit.Immune2.Up	entrezgene	3902	ENSG00000089692	ENSG00000089692	3902	LAG3
Immune2	1	Ignatiadis2012_autoSplit.Immune2.Up	entrezgene	4068	ENSG00000183918	ENSG00000183918	4068	SH2D1A
Immune2	1	Ignatiadis2012_autoSplit.Immune2.Up	entrezgene	4069	ENSG00000090382	ENSG00000090382	4069	LYZ
Immune2	1	Ignatiadis2012_autoSplit.Immune2.Up	entrezgene	4218	ENSG00000167461	ENSG00000167461	4218	RAB8A
Immune2	1	Ignatiadis2012_autoSplit.Immune2.Up	entrezgene	4283	ENSG00000138755	ENSG00000138755	4283	CXCL9
Immune2	1	Ignatiadis2012_autoSplit.Immune2.Up	entrezgene	4599	ENSG00000157601	ENSG00000157601	4599	MX1
Immune2	1	Ignatiadis2012_autoSplit.Immune2.Up	entrezgene	4600	ENSG00000183486	ENSG00000183486	4600	MX2
Immune2	1	Ignatiadis2012_autoSplit.Immune2.Up	entrezgene	5026	ENSG00000083454	--	--	--
Immune2	1	Ignatiadis2012_autoSplit.Immune2.Up	entrezgene	50856	ENSG00000111729	ENSG00000111729	50856	CLEC4A
Immune2	1	Ignatiadis2012_autoSplit.Immune2.Up	entrezgene	51191	ENSG00000138646	ENSG00000138646	51191	HERC5
Immune2	1	Ignatiadis2012_autoSplit.Immune2.Up	entrezgene	51237	ENSG00000170476	ENSG00000170476	51237	MZB1
Immune2	1	Ignatiadis2012_autoSplit.Immune2.Up	entrezgene	51316	ENSG00000145287	ENSG00000145287	51316	PLAC8
Immune2	1	Ignatiadis2012_autoSplit.Immune2.Up	entrezgene	51513	ENSG00000010030	ENSG00000010030	51513	ETV7
Immune2	1	Ignatiadis2012_autoSplit.Immune2.Up	entrezgene	51816	ENSG00000093072	ENSG00000093072	51816	CECR1
Immune2	1	Ignatiadis2012_autoSplit.Immune2.Up	entrezgene	54	ENSG00000102575	ENSG00000102575	54	ACP5
Immune2	1	Ignatiadis2012_autoSplit.Immune2.Up	entrezgene	55008	ENSG00000138642	ENSG00000138642	55008	HERC6
Immune2	1	Ignatiadis2012_autoSplit.Immune2.Up	entrezgene	55337	ENSG00000130813	ENSG00000130813	55337	C19orf66
Immune2	1	Ignatiadis2012_autoSplit.Immune2.Up	entrezgene	55601	ENSG00000137628	ENSG00000137628	55601	DDX60
Immune2	1	Ignatiadis2012_autoSplit.Immune2.Up	entrezgene	55843	ENSG00000075884	ENSG00000075884	55843	ARHGAP15
Immune2	1	Ignatiadis2012_autoSplit.Immune2.Up	entrezgene	56829	ENSG00000105939	ENSG00000105939	56829	ZC3HAV1
Immune2	1	Ignatiadis2012_autoSplit.Immune2.Up	entrezgene	5720	ENSG00000092010	ENSG00000092010	5720	PSME1
Immune2	1	Ignatiadis2012_autoSplit.Immune2.Up	entrezgene	5778	ENSG00000143851	ENSG00000143851	5778	PTPN7
Immune2	1	Ignatiadis2012_autoSplit.Immune2.Up	entrezgene	5993	ENSG00000143390	ENSG00000143390	5993	RFX5
Immune2	1	Ignatiadis2012_autoSplit.Immune2.Up	entrezgene	6352	ENSG00000271503	--	--	--
Immune2	1	Ignatiadis2012_autoSplit.Immune2.Up	entrezgene	6355	ENSG00000108700	ENSG00000108700	6355	CCL8
Immune2	1	Ignatiadis2012_autoSplit.Immune2.Up	entrezgene	6373	ENSG00000169248	ENSG00000169248	6373	CXCL11
Immune2	1	Ignatiadis2012_autoSplit.Immune2.Up	entrezgene	6398	ENSG00000141574	ENSG00000141574	6398	SECTM1
Immune2	1	Ignatiadis2012_autoSplit.Immune2.Up	entrezgene	64108	ENSG00000136514	ENSG00000136514	64108	RTP4
Immune2	1	Ignatiadis2012_autoSplit.Immune2.Up	entrezgene	6772	ENSG00000115415	ENSG00000115415	6772	STAT1
Immune2	1	Ignatiadis2012_autoSplit.Immune2.Up	entrezgene	6775	ENSG00000138378	ENSG00000138378	6775	STAT4
Immune2	1	Ignatiadis2012_autoSplit.Immune2.Up	entrezgene	684	ENSG00000130303	ENSG00000130303	684	BST2
Immune2	1	Ignatiadis2012_autoSplit.Immune2.Up	entrezgene	6890	ENSG00000168394	--	--	--
Immune2	1	Ignatiadis2012_autoSplit.Immune2.Up	entrezgene	7187	ENSG00000131323	ENSG00000131323	7187	TRAF3
Immune2	1	Ignatiadis2012_autoSplit.Immune2.Up	entrezgene	7409	ENSG00000141968	ENSG00000141968	7409	VAV1
Immune2	1	Ignatiadis2012_autoSplit.Immune2.Up	entrezgene	7805	ENSG00000162511	ENSG00000162511	7805	LAPTM5
Immune2	1	Ignatiadis2012_autoSplit.Immune2.Up	entrezgene	79132	ENSG00000108771	--	--	--
Immune2	1	Ignatiadis2012_autoSplit.Immune2.Up	entrezgene	7941	ENSG00000146070	ENSG00000146070	7941	PLA2G7
Immune2	1	Ignatiadis2012_autoSplit.Immune2.Up	entrezgene	8519	ENSG00000185885	ENSG00000185885	8519	IFITM1
Immune2	1	Ignatiadis2012_autoSplit.Immune2.Up	entrezgene	9034	ENSG00000121797	--	--	--
Immune2	1	Ignatiadis2012_autoSplit.Immune2.Up	entrezgene	9111	ENSG00000123609	ENSG00000123609	9111	NMI
Immune2	1	Ignatiadis2012_autoSplit.Immune2.Up	entrezgene	914	ENSG00000116824	ENSG00000116824	914	CD2
Immune2	1	Ignatiadis2012_autoSplit.Immune2.Up	entrezgene	91543	ENSG00000134321	ENSG00000134321	91543	RSAD2
Immune2	1	Ignatiadis2012_autoSplit.Immune2.Up	entrezgene	917	ENSG00000160654	ENSG00000160654	917	CD3G
Immune2	1	Ignatiadis2012_autoSplit.Immune2.Up	entrezgene	959	ENSG00000102245	ENSG00000102245	959	CD40LG
Immune2	1	Ignatiadis2012_autoSplit.Immune2.Up	entrezgene	9595	ENSG00000115165	ENSG00000115165	9595	CYTIP
Immune2	1	Ignatiadis2012_autoSplit.Immune2.Up	entrezgene	962	ENSG00000117091	ENSG00000117091	962	CD48
Immune2	1	Ignatiadis2012_autoSplit.Immune2.Up	entrezgene	9636	ENSG00000187608	ENSG00000187608	9636	ISG15
Immune2	1	Ignatiadis2012_autoSplit.Immune2.Up	entrezgene	969	ENSG00000110848	ENSG00000110848	969	CD69
Immune2	1	Ignatiadis2012_autoSplit.Immune2.Up	entrezgene	9806	ENSG00000107742	ENSG00000107742	9806	SPOCK2
Immune2	1	Ignatiadis2012_autoSplit.Immune2.Up	entrezgene	9985	ENSG00000100918	ENSG00000100918	9985	REC8
Immune2	-1	Ignatiadis2012_autoSplit.Immune2.Down	entrezgene	10126	ENSG00000100246	ENSG00000100246	10126	DNAL4
Immune2	-1	Ignatiadis2012_autoSplit.Immune2.Down	entrezgene	1942	ENSG00000169242	ENSG00000169242	1942	EFNA1
Immune2	-1	Ignatiadis2012_autoSplit.Immune2.Down	entrezgene	23564	ENSG00000213722	--	--	--
PTEN	1	Ignatiadis2012_autoSplit.PTEN.Up	entrezgene	1010	ENSG00000154162	ENSG00000154162	1010	CDH12
PTEN	1	Ignatiadis2012_autoSplit.PTEN.Up	entrezgene	10383	ENSG00000188229	ENSG00000188229	10383	TUBB2C
PTEN	1	Ignatiadis2012_autoSplit.PTEN.Up	entrezgene	10440	ENSG00000134375	ENSG00000134375	10440	TIMM17A
PTEN	1	Ignatiadis2012_autoSplit.PTEN.Up	entrezgene	10541	ENSG00000136938	ENSG00000136938	10541	ANP32B
PTEN	1	Ignatiadis2012_autoSplit.PTEN.Up	entrezgene	10589	ENSG00000175550	ENSG00000175550	10589	DRAP1
PTEN	1	Ignatiadis2012_autoSplit.PTEN.Up	entrezgene	10606	ENSG00000128050	ENSG00000128050	10606	PAICS
PTEN	1	Ignatiadis2012_autoSplit.PTEN.Up	entrezgene	1062	ENSG00000138778	ENSG00000138778	1062	CENPE
PTEN	1	Ignatiadis2012_autoSplit.PTEN.Up	entrezgene	10951	ENSG00000108468	ENSG00000108468	10951	CBX1
PTEN	1	Ignatiadis2012_autoSplit.PTEN.Up	entrezgene	10963	ENSG00000168439	ENSG00000168439	10963	STIP1
PTEN	1	Ignatiadis2012_autoSplit.PTEN.Up	entrezgene	11004	ENSG00000142945	ENSG00000142945	11004	KIF2C
PTEN	1	Ignatiadis2012_autoSplit.PTEN.Up	entrezgene	11073	ENSG00000163781	ENSG00000163781	11073	TOPBP1
PTEN	1	Ignatiadis2012_autoSplit.PTEN.Up	entrezgene	11169	ENSG00000198554	ENSG00000198554	11169	WDHD1
PTEN	1	Ignatiadis2012_autoSplit.PTEN.Up	entrezgene	1164	ENSG00000123975	ENSG00000123975	1164	CKS2
PTEN	1	Ignatiadis2012_autoSplit.PTEN.Up	entrezgene	1207	ENSG00000074201	ENSG00000074201	1207	CLNS1A
PTEN	1	Ignatiadis2012_autoSplit.PTEN.Up	entrezgene	126731	ENSG00000154429	ENSG00000154429	126731	C1orf96
PTEN	1	Ignatiadis2012_autoSplit.PTEN.Up	entrezgene	1503	ENSG00000171793	--	--	--
PTEN	1	Ignatiadis2012_autoSplit.PTEN.Up	entrezgene	151188	ENSG00000177917	ENSG00000177917	151188	PFAAP1
PTEN	1	Ignatiadis2012_autoSplit.PTEN.Up	entrezgene	151246	ENSG00000163535	ENSG00000163535	151246	SGOL2
PTEN	1	Ignatiadis2012_autoSplit.PTEN.Up	entrezgene	151636	ENSG00000163840	ENSG00000163840	151636	DTX3L
PTEN	1	Ignatiadis2012_autoSplit.PTEN.Up	entrezgene	157313	ENSG00000184661	ENSG00000184661	157313	CDCA2
PTEN	1	Ignatiadis2012_autoSplit.PTEN.Up	entrezgene	205564	ENSG00000119231	ENSG00000119231	205564	SENP5
PTEN	1	Ignatiadis2012_autoSplit.PTEN.Up	entrezgene	219285	ENSG00000177409	ENSG00000177409	219285	SAMD9L
PTEN	1	Ignatiadis2012_autoSplit.PTEN.Up	entrezgene	219988	ENSG00000166889	ENSG00000166889	219988	PATL1
PTEN	1	Ignatiadis2012_autoSplit.PTEN.Up	entrezgene	23279	ENSG00000030066	ENSG00000030066	23279	NUP160
PTEN	1	Ignatiadis2012_autoSplit.PTEN.Up	entrezgene	24137	ENSG00000090889	ENSG00000090889	24137	KIF4A
PTEN	1	Ignatiadis2012_autoSplit.PTEN.Up	entrezgene	25852	ENSG00000114098	ENSG00000114098	25852	ARMC8
PTEN	1	Ignatiadis2012_autoSplit.PTEN.Up	entrezgene	2618	ENSG00000159131	--	--	--
PTEN	1	Ignatiadis2012_autoSplit.PTEN.Up	entrezgene	26973	ENSG00000110172	ENSG00000110172	26973	CHORDC1
PTEN	1	Ignatiadis2012_autoSplit.PTEN.Up	entrezgene	27238	ENSG00000068394	ENSG00000068394	27238	GPKOW
PTEN	1	Ignatiadis2012_autoSplit.PTEN.Up	entrezgene	27316	ENSG00000147274	ENSG00000147274	27316	RBMX
PTEN	1	Ignatiadis2012_autoSplit.PTEN.Up	entrezgene	29028	ENSG00000156802	ENSG00000156802	29028	ATAD2
PTEN	1	Ignatiadis2012_autoSplit.PTEN.Up	entrezgene	29105	ENSG00000070761	ENSG00000070761	29105	C16orf80
PTEN	1	Ignatiadis2012_autoSplit.PTEN.Up	entrezgene	29127	ENSG00000161800	ENSG00000161800	29127	RACGAP1
PTEN	1	Ignatiadis2012_autoSplit.PTEN.Up	entrezgene	29979	ENSG00000135018	ENSG00000135018	29979	UBQLN1
PTEN	1	Ignatiadis2012_autoSplit.PTEN.Up	entrezgene	2999	ENSG00000100450	ENSG00000100450	2999	GZMH
PTEN	1	Ignatiadis2012_autoSplit.PTEN.Up	entrezgene	3066	ENSG00000196591	ENSG00000196591	3066	HDAC2
PTEN	1	Ignatiadis2012_autoSplit.PTEN.Up	entrezgene	3192	ENSG00000153187	ENSG00000153187	3192	HNRNPU
PTEN	1	Ignatiadis2012_autoSplit.PTEN.Up	entrezgene	330	ENSG00000023445	ENSG00000023445	330	BIRC3
PTEN	1	Ignatiadis2012_autoSplit.PTEN.Up	entrezgene	3608	ENSG00000143621	ENSG00000143621	3608	ILF2
PTEN	1	Ignatiadis2012_autoSplit.PTEN.Up	entrezgene	3796	ENSG00000068796	ENSG00000068796	3796	KIF2A
PTEN	1	Ignatiadis2012_autoSplit.PTEN.Up	entrezgene	3833	ENSG00000237649	--	--	--
PTEN	1	Ignatiadis2012_autoSplit.PTEN.Up	entrezgene	3838	ENSG00000182481	--	--	--
PTEN	1	Ignatiadis2012_autoSplit.PTEN.Up	entrezgene	387103	ENSG00000203760	ENSG00000203760	387103	CENPW
PTEN	1	Ignatiadis2012_autoSplit.PTEN.Up	entrezgene	3925	ENSG00000117632	ENSG00000117632	3925	STMN1
PTEN	1	Ignatiadis2012_autoSplit.PTEN.Up	entrezgene	4172	ENSG00000112118	ENSG00000112118	4172	MCM3
PTEN	1	Ignatiadis2012_autoSplit.PTEN.Up	entrezgene	4175	ENSG00000076003	ENSG00000076003	4175	MCM6
PTEN	1	Ignatiadis2012_autoSplit.PTEN.Up	entrezgene	4259	ENSG00000143198	ENSG00000143198	4259	MGST3
PTEN	1	Ignatiadis2012_autoSplit.PTEN.Up	entrezgene	4291	ENSG00000178053	ENSG00000178053	4291	MLF1
PTEN	1	Ignatiadis2012_autoSplit.PTEN.Up	entrezgene	4751	ENSG00000117650	ENSG00000117650	4751	NEK2
PTEN	1	Ignatiadis2012_autoSplit.PTEN.Up	entrezgene	5052	ENSG00000117450	ENSG00000117450	5052	PRDX1
PTEN	1	Ignatiadis2012_autoSplit.PTEN.Up	entrezgene	5111	ENSG00000132646	ENSG00000132646	5111	PCNA
PTEN	1	Ignatiadis2012_autoSplit.PTEN.Up	entrezgene	51642	ENSG00000175581	ENSG00000175581	51642	MRPL48
PTEN	1	Ignatiadis2012_autoSplit.PTEN.Up	entrezgene	51773	ENSG00000048649	ENSG00000048649	51773	RSF1
PTEN	1	Ignatiadis2012_autoSplit.PTEN.Up	entrezgene	5290	ENSG00000121879	ENSG00000121879	5290	PIK3CA
PTEN	1	Ignatiadis2012_autoSplit.PTEN.Up	entrezgene	5359	ENSG00000188313	ENSG00000188313	5359	PLSCR1
PTEN	1	Ignatiadis2012_autoSplit.PTEN.Up	entrezgene	54014	ENSG00000185658	ENSG00000185658	54014	BRWD1
PTEN	1	Ignatiadis2012_autoSplit.PTEN.Up	entrezgene	54503	ENSG00000177054	ENSG00000177054	54503	ZDHHC13
PTEN	1	Ignatiadis2012_autoSplit.PTEN.Up	entrezgene	54534	ENSG00000136897	ENSG00000136897	54534	MRPL50
PTEN	1	Ignatiadis2012_autoSplit.PTEN.Up	entrezgene	54625	ENSG00000173193	ENSG00000173193	54625	PARP14
PTEN	1	Ignatiadis2012_autoSplit.PTEN.Up	entrezgene	54845	ENSG00000104413	ENSG00000104413	54845	ESRP1
PTEN	1	Ignatiadis2012_autoSplit.PTEN.Up	entrezgene	54906	ENSG00000108021	--	--	--
PTEN	1	Ignatiadis2012_autoSplit.PTEN.Up	entrezgene	55248	ENSG00000065600	ENSG00000065600	55248	TMEM206
PTEN	1	Ignatiadis2012_autoSplit.PTEN.Up	entrezgene	55827	ENSG00000143164	ENSG00000143164	55827	DCAF6
PTEN	1	Ignatiadis2012_autoSplit.PTEN.Up	entrezgene	5612	ENSG00000137492	ENSG00000137492	5612	PRKRIR
PTEN	1	Ignatiadis2012_autoSplit.PTEN.Up	entrezgene	5718	ENSG00000197170	ENSG00000197170	5718	PSMD12
PTEN	1	Ignatiadis2012_autoSplit.PTEN.Up	entrezgene	57380	ENSG00000124532	ENSG00000124532	57380	MRS2
PTEN	1	Ignatiadis2012_autoSplit.PTEN.Up	entrezgene	5870	ENSG00000175582	ENSG00000175582	5870	RAB6A
PTEN	1	Ignatiadis2012_autoSplit.PTEN.Up	entrezgene	5873	ENSG00000069974	ENSG00000069974	5873	RAB27A
PTEN	1	Ignatiadis2012_autoSplit.PTEN.Up	entrezgene	5889	ENSG00000108384	ENSG00000108384	5889	RAD51C
PTEN	1	Ignatiadis2012_autoSplit.PTEN.Up	entrezgene	5984	ENSG00000163918	ENSG00000163918	5984	RFC4
PTEN	1	Ignatiadis2012_autoSplit.PTEN.Up	entrezgene	60313	ENSG00000159592	ENSG00000159592	60313	GPBP1L1
PTEN	1	Ignatiadis2012_autoSplit.PTEN.Up	entrezgene	6397	ENSG00000129657	ENSG00000129657	6397	SEC14L1
PTEN	1	Ignatiadis2012_autoSplit.PTEN.Up	entrezgene	6426	ENSG00000136450	ENSG00000136450	6426	SRSF1
PTEN	1	Ignatiadis2012_autoSplit.PTEN.Up	entrezgene	6434	ENSG00000136527	ENSG00000136527	6434	TRA2B
PTEN	1	Ignatiadis2012_autoSplit.PTEN.Up	entrezgene	64789	ENSG00000164002	ENSG00000164002	64789	DEM1
PTEN	1	Ignatiadis2012_autoSplit.PTEN.Up	entrezgene	64793	ENSG00000130695	ENSG00000130695	64793	CCDC21
PTEN	1	Ignatiadis2012_autoSplit.PTEN.Up	entrezgene	64844	ENSG00000136536	ENSG00000136536	64844	MARCH7
PTEN	1	Ignatiadis2012_autoSplit.PTEN.Up	entrezgene	6596	ENSG00000071794	ENSG00000071794	6596	HLTF
PTEN	1	Ignatiadis2012_autoSplit.PTEN.Up	entrezgene	6612	ENSG00000184900	ENSG00000184900	6612	SUMO3
PTEN	1	Ignatiadis2012_autoSplit.PTEN.Up	entrezgene	6619	ENSG00000164975	ENSG00000164975	6619	SNAPC3
PTEN	1	Ignatiadis2012_autoSplit.PTEN.Up	entrezgene	6632	ENSG00000167088	ENSG00000167088	6632	SNRPD1
PTEN	1	Ignatiadis2012_autoSplit.PTEN.Up	entrezgene	6732	ENSG00000096063	ENSG00000096063	6732	SRPK1
PTEN	1	Ignatiadis2012_autoSplit.PTEN.Up	entrezgene	6772	ENSG00000115415	ENSG00000115415	6772	STAT1
PTEN	1	Ignatiadis2012_autoSplit.PTEN.Up	entrezgene	6790	ENSG00000087586	ENSG00000087586	6790	AURKA
PTEN	1	Ignatiadis2012_autoSplit.PTEN.Up	entrezgene	6941	ENSG00000137310	--	--	--
PTEN	1	Ignatiadis2012_autoSplit.PTEN.Up	entrezgene	699	ENSG00000169679	ENSG00000169679	699	BUB1
PTEN	1	Ignatiadis2012_autoSplit.PTEN.Up	entrezgene	7159	ENSG00000143514	ENSG00000143514	7159	TP53BP2
PTEN	1	Ignatiadis2012_autoSplit.PTEN.Up	entrezgene	7307	ENSG00000160201	ENSG00000160201	7307	U2AF1
PTEN	1	Ignatiadis2012_autoSplit.PTEN.Up	entrezgene	7372	ENSG00000114491	ENSG00000114491	7372	UMPS
PTEN	1	Ignatiadis2012_autoSplit.PTEN.Up	entrezgene	7444	ENSG00000028116	ENSG00000028116	7444	VRK2
PTEN	1	Ignatiadis2012_autoSplit.PTEN.Up	entrezgene	79132	ENSG00000108771	--	--	--
PTEN	1	Ignatiadis2012_autoSplit.PTEN.Up	entrezgene	7936	ENSG00000204356	--	--	--
PTEN	1	Ignatiadis2012_autoSplit.PTEN.Up	entrezgene	79572	ENSG00000133657	--	--	--
PTEN	1	Ignatiadis2012_autoSplit.PTEN.Up	entrezgene	79694	ENSG00000172469	ENSG00000172469	79694	MANEA
PTEN	1	Ignatiadis2012_autoSplit.PTEN.Up	entrezgene	79894	ENSG00000171161	ENSG00000171161	79894	ZNF672
PTEN	1	Ignatiadis2012_autoSplit.PTEN.Up	entrezgene	81610	ENSG00000101447	ENSG00000101447	81610	FAM83D
PTEN	1	Ignatiadis2012_autoSplit.PTEN.Up	entrezgene	8208	ENSG00000159259	ENSG00000159259	8208	CHAF1B
PTEN	1	Ignatiadis2012_autoSplit.PTEN.Up	entrezgene	8317	ENSG00000097046	ENSG00000097046	8317	CDC7
PTEN	1	Ignatiadis2012_autoSplit.PTEN.Up	entrezgene	84955	ENSG00000120526	ENSG00000120526	84955	NUDCD1
PTEN	1	Ignatiadis2012_autoSplit.PTEN.Up	entrezgene	8532	ENSG00000109625	ENSG00000109625	8532	CPZ
PTEN	1	Ignatiadis2012_autoSplit.PTEN.Up	entrezgene	87178	ENSG00000138035	ENSG00000138035	87178	PNPT1
PTEN	1	Ignatiadis2012_autoSplit.PTEN.Up	entrezgene	891	ENSG00000134057	ENSG00000134057	891	CCNB1
PTEN	1	Ignatiadis2012_autoSplit.PTEN.Up	entrezgene	9133	ENSG00000157456	ENSG00000157456	9133	CCNB2
PTEN	1	Ignatiadis2012_autoSplit.PTEN.Up	entrezgene	9232	ENSG00000164611	ENSG00000164611	9232	PTTG1
PTEN	1	Ignatiadis2012_autoSplit.PTEN.Up	entrezgene	92342	ENSG00000171806	ENSG00000171806	92342	METTL18
PTEN	1	Ignatiadis2012_autoSplit.PTEN.Up	entrezgene	9392	ENSG00000135966	ENSG00000135966	9392	TGFBRAP1
PTEN	1	Ignatiadis2012_autoSplit.PTEN.Up	entrezgene	9493	ENSG00000137807	ENSG00000137807	9493	KIF23
PTEN	1	Ignatiadis2012_autoSplit.PTEN.Up	entrezgene	9582	ENSG00000179750	ENSG00000179750	9582	APOBEC3A
PTEN	1	Ignatiadis2012_autoSplit.PTEN.Up	entrezgene	9711	ENSG00000145016	--	--	--
PTEN	1	Ignatiadis2012_autoSplit.PTEN.Up	entrezgene	9787	ENSG00000126787	ENSG00000126787	9787	DLGAP5
PTEN	1	Ignatiadis2012_autoSplit.PTEN.Up	entrezgene	9833	ENSG00000165304	ENSG00000165304	9833	MELK
PTEN	1	Ignatiadis2012_autoSplit.PTEN.Up	entrezgene	9928	ENSG00000118193	ENSG00000118193	9928	KIF14
PTEN	-1	Ignatiadis2012_autoSplit.PTEN.Down	entrezgene	10121	ENSG00000138107	ENSG00000138107	10121	ACTR1A
PTEN	-1	Ignatiadis2012_autoSplit.PTEN.Down	entrezgene	10206	ENSG00000204977	ENSG00000204977	10206	TRIM13
PTEN	-1	Ignatiadis2012_autoSplit.PTEN.Down	entrezgene	10399	ENSG00000204628	ENSG00000204628	10399	GNB2L1
PTEN	-1	Ignatiadis2012_autoSplit.PTEN.Down	entrezgene	10540	ENSG00000175203	ENSG00000175203	10540	DCTN2
PTEN	-1	Ignatiadis2012_autoSplit.PTEN.Down	entrezgene	10972	ENSG00000170348	ENSG00000170348	10972	TMED10
PTEN	-1	Ignatiadis2012_autoSplit.PTEN.Down	entrezgene	10975	ENSG00000127540	--	--	--
PTEN	-1	Ignatiadis2012_autoSplit.PTEN.Down	entrezgene	11171	ENSG00000023734	ENSG00000023734	11171	PT-WD
PTEN	-1	Ignatiadis2012_autoSplit.PTEN.Down	entrezgene	11329	ENSG00000112079	ENSG00000112079	11329	STK38
PTEN	-1	Ignatiadis2012_autoSplit.PTEN.Down	entrezgene	11337	ENSG00000170296	--	--	--
PTEN	-1	Ignatiadis2012_autoSplit.PTEN.Down	entrezgene	1265	ENSG00000064666	ENSG00000064666	1265	CNN2
PTEN	-1	Ignatiadis2012_autoSplit.PTEN.Down	entrezgene	1311	ENSG00000105664	ENSG00000105664	1311	COMP
PTEN	-1	Ignatiadis2012_autoSplit.PTEN.Down	entrezgene	140459	ENSG00000148331	ENSG00000148331	140459	ASB6
PTEN	-1	Ignatiadis2012_autoSplit.PTEN.Down	entrezgene	145781	ENSG00000137878	--	--	--
PTEN	-1	Ignatiadis2012_autoSplit.PTEN.Down	entrezgene	1848	ENSG00000139318	ENSG00000139318	1848	DUSP6
PTEN	-1	Ignatiadis2012_autoSplit.PTEN.Down	entrezgene	1889	ENSG00000117298	ENSG00000117298	1889	ECE1
PTEN	-1	Ignatiadis2012_autoSplit.PTEN.Down	entrezgene	200734	ENSG00000198369	ENSG00000198369	200734	SPRED2
PTEN	-1	Ignatiadis2012_autoSplit.PTEN.Down	entrezgene	2043	ENSG00000116106	ENSG00000116106	2043	EPHA4
PTEN	-1	Ignatiadis2012_autoSplit.PTEN.Down	entrezgene	221981	ENSG00000005108	--	--	--
PTEN	-1	Ignatiadis2012_autoSplit.PTEN.Down	entrezgene	2281	ENSG00000119782	ENSG00000119782	2281	FKBP1B
PTEN	-1	Ignatiadis2012_autoSplit.PTEN.Down	entrezgene	23111	ENSG00000133104	ENSG00000133104	23111	SPG20
PTEN	-1	Ignatiadis2012_autoSplit.PTEN.Down	entrezgene	2331	ENSG00000122176	ENSG00000122176	2331	FMOD
PTEN	-1	Ignatiadis2012_autoSplit.PTEN.Down	entrezgene	23613	ENSG00000101040	ENSG00000101040	23613	ZMYND8
PTEN	-1	Ignatiadis2012_autoSplit.PTEN.Down	entrezgene	25794	ENSG00000186765	--	--	--
PTEN	-1	Ignatiadis2012_autoSplit.PTEN.Down	entrezgene	26123	ENSG00000119977	ENSG00000119977	26123	TCTN3
PTEN	-1	Ignatiadis2012_autoSplit.PTEN.Down	entrezgene	27122	ENSG00000050165	ENSG00000050165	27122	DKK3
PTEN	-1	Ignatiadis2012_autoSplit.PTEN.Down	entrezgene	2767	ENSG00000088256	ENSG00000088256	2767	GNA11
PTEN	-1	Ignatiadis2012_autoSplit.PTEN.Down	entrezgene	3416	ENSG00000119912	ENSG00000119912	3416	IDE
PTEN	-1	Ignatiadis2012_autoSplit.PTEN.Down	entrezgene	3705	ENSG00000100605	ENSG00000100605	3705	ITPK1
PTEN	-1	Ignatiadis2012_autoSplit.PTEN.Down	entrezgene	374868	ENSG00000166377	--	--	--
PTEN	-1	Ignatiadis2012_autoSplit.PTEN.Down	entrezgene	3983	ENSG00000099204	ENSG00000099204	3983	ABLIM1
PTEN	-1	Ignatiadis2012_autoSplit.PTEN.Down	entrezgene	4038	ENSG00000134569	ENSG00000134569	4038	LRP4
PTEN	-1	Ignatiadis2012_autoSplit.PTEN.Down	entrezgene	4094	ENSG00000178573	ENSG00000178573	4094	MAF
PTEN	-1	Ignatiadis2012_autoSplit.PTEN.Down	entrezgene	4629	ENSG00000133392	ENSG00000133392	4629	MYH11
PTEN	-1	Ignatiadis2012_autoSplit.PTEN.Down	entrezgene	50861	ENSG00000197457	ENSG00000197457	50861	STMN3
PTEN	-1	Ignatiadis2012_autoSplit.PTEN.Down	entrezgene	5094	ENSG00000197111	ENSG00000197111	5094	PCBP2
PTEN	-1	Ignatiadis2012_autoSplit.PTEN.Down	entrezgene	51028	ENSG00000136100	ENSG00000136100	51028	VPS36
PTEN	-1	Ignatiadis2012_autoSplit.PTEN.Down	entrezgene	5159	ENSG00000113721	ENSG00000113721	5159	PDGFRB
PTEN	-1	Ignatiadis2012_autoSplit.PTEN.Down	entrezgene	5169	ENSG00000154269	ENSG00000154269	5169	ENPP3
PTEN	-1	Ignatiadis2012_autoSplit.PTEN.Down	entrezgene	54531	ENSG00000105556	ENSG00000105556	54531	MIER2
PTEN	-1	Ignatiadis2012_autoSplit.PTEN.Down	entrezgene	54556	ENSG00000071243	ENSG00000071243	54556	ING3
PTEN	-1	Ignatiadis2012_autoSplit.PTEN.Down	entrezgene	54838	ENSG00000166272	ENSG00000166272	54838	C10orf26
PTEN	-1	Ignatiadis2012_autoSplit.PTEN.Down	entrezgene	55101	ENSG00000105341	ENSG00000105341	55101	ATP5SL
PTEN	-1	Ignatiadis2012_autoSplit.PTEN.Down	entrezgene	55662	ENSG00000166135	ENSG00000166135	55662	HIF1AN
PTEN	-1	Ignatiadis2012_autoSplit.PTEN.Down	entrezgene	56977	ENSG00000173320	ENSG00000173320	56977	STOX2
PTEN	-1	Ignatiadis2012_autoSplit.PTEN.Down	entrezgene	5728	ENSG00000171862	ENSG00000171862	5728	PTEN
PTEN	-1	Ignatiadis2012_autoSplit.PTEN.Down	entrezgene	5797	ENSG00000173482	ENSG00000173482	5797	PTPRM
PTEN	-1	Ignatiadis2012_autoSplit.PTEN.Down	entrezgene	6228	ENSG00000186468	ENSG00000186468	6228	RPS23
PTEN	-1	Ignatiadis2012_autoSplit.PTEN.Down	entrezgene	7284	ENSG00000178952	ENSG00000178952	7284	TUFM
PTEN	-1	Ignatiadis2012_autoSplit.PTEN.Down	entrezgene	79628	ENSG00000169247	ENSG00000169247	79628	SH3TC2
PTEN	-1	Ignatiadis2012_autoSplit.PTEN.Down	entrezgene	80031	ENSG00000137872	ENSG00000137872	80031	SEMA6D
PTEN	-1	Ignatiadis2012_autoSplit.PTEN.Down	entrezgene	80306	ENSG00000118579	ENSG00000118579	80306	MED28
PTEN	-1	Ignatiadis2012_autoSplit.PTEN.Down	entrezgene	83700	ENSG00000166086	ENSG00000166086	83700	JAM3
PTEN	-1	Ignatiadis2012_autoSplit.PTEN.Down	entrezgene	8450	ENSG00000158290	ENSG00000158290	8450	CUL4B
PTEN	-1	Ignatiadis2012_autoSplit.PTEN.Down	entrezgene	84896	ENSG00000138138	ENSG00000138138	84896	ATAD1
PTEN	-1	Ignatiadis2012_autoSplit.PTEN.Down	entrezgene	84942	ENSG00000177082	ENSG00000177082	84942	WDR73
PTEN	-1	Ignatiadis2012_autoSplit.PTEN.Down	entrezgene	8510	ENSG00000189409	ENSG00000189409	8510	MMP23B
PTEN	-1	Ignatiadis2012_autoSplit.PTEN.Down	entrezgene	8576	ENSG00000115661	ENSG00000115661	8576	STK16
PTEN	-1	Ignatiadis2012_autoSplit.PTEN.Down	entrezgene	8681	ENSG00000168970	--	--	--
PTEN	-1	Ignatiadis2012_autoSplit.PTEN.Down	entrezgene	8724	ENSG00000112335	ENSG00000112335	8724	SNX3
PTEN	-1	Ignatiadis2012_autoSplit.PTEN.Down	entrezgene	8848	ENSG00000102804	ENSG00000102804	8848	TSC22D1
PTEN	-1	Ignatiadis2012_autoSplit.PTEN.Down	entrezgene	8897	ENSG00000100330	ENSG00000100330	8897	MTMR3
PTEN	-1	Ignatiadis2012_autoSplit.PTEN.Down	entrezgene	89122	ENSG00000146833	ENSG00000146833	89122	TRIM4
PTEN	-1	Ignatiadis2012_autoSplit.PTEN.Down	entrezgene	9037	ENSG00000112902	--	--	--
PTEN	-1	Ignatiadis2012_autoSplit.PTEN.Down	entrezgene	9044	ENSG00000095564	ENSG00000095564	9044	BTAF1
PTEN	-1	Ignatiadis2012_autoSplit.PTEN.Down	entrezgene	9252	ENSG00000100784	ENSG00000100784	9252	RPS6KA5
PTEN	-1	Ignatiadis2012_autoSplit.PTEN.Down	entrezgene	9897	ENSG00000164961	ENSG00000164961	9897	KIAA0196
Stroma	1	Ignatiadis2012_autoSplit.Stroma1.Up	entrezgene	1009	ENSG00000140937	ENSG00000140937	1009	CDH11
Stroma	1	Ignatiadis2012_autoSplit.Stroma1.Up	entrezgene	10234	ENSG00000128606	ENSG00000128606	10234	LRRC17
Stroma	1	Ignatiadis2012_autoSplit.Stroma1.Up	entrezgene	10418	ENSG00000262655	--	--	--
Stroma	1	Ignatiadis2012_autoSplit.Stroma1.Up	entrezgene	10631	ENSG00000133110	ENSG00000133110	10631	POSTN
Stroma	1	Ignatiadis2012_autoSplit.Stroma1.Up	entrezgene	114899	ENSG00000082196	ENSG00000082196	114899	C1QTNF3
Stroma	1	Ignatiadis2012_autoSplit.Stroma1.Up	entrezgene	1278	ENSG00000164692	ENSG00000164692	1278	COL1A2
Stroma	1	Ignatiadis2012_autoSplit.Stroma1.Up	entrezgene	1281	ENSG00000168542	ENSG00000168542	1281	COL3A1
Stroma	1	Ignatiadis2012_autoSplit.Stroma1.Up	entrezgene	1290	ENSG00000204262	ENSG00000204262	1290	COL5A2
Stroma	1	Ignatiadis2012_autoSplit.Stroma1.Up	entrezgene	1291	ENSG00000142156	ENSG00000142156	1291	COL6A1
Stroma	1	Ignatiadis2012_autoSplit.Stroma1.Up	entrezgene	1293	ENSG00000163359	ENSG00000163359	1293	COL6A3
Stroma	1	Ignatiadis2012_autoSplit.Stroma1.Up	entrezgene	1300	ENSG00000123500	ENSG00000123500	1300	COL10A1
Stroma	1	Ignatiadis2012_autoSplit.Stroma1.Up	entrezgene	1462	ENSG00000038427	ENSG00000038427	1462	VCAN
Stroma	1	Ignatiadis2012_autoSplit.Stroma1.Up	entrezgene	1513	ENSG00000143387	ENSG00000143387	1513	CTSK
Stroma	1	Ignatiadis2012_autoSplit.Stroma1.Up	entrezgene	1634	ENSG00000011465	ENSG00000011465	1634	DCN
Stroma	1	Ignatiadis2012_autoSplit.Stroma1.Up	entrezgene	165	ENSG00000106624	ENSG00000106624	165	AEBP1
Stroma	1	Ignatiadis2012_autoSplit.Stroma1.Up	entrezgene	1809	ENSG00000113657	ENSG00000113657	1809	DPYSL3
Stroma	1	Ignatiadis2012_autoSplit.Stroma1.Up	entrezgene	1842	ENSG00000106823	ENSG00000106823	1842	ECM2
Stroma	1	Ignatiadis2012_autoSplit.Stroma1.Up	entrezgene	2191	ENSG00000078098	ENSG00000078098	2191	FAP
Stroma	1	Ignatiadis2012_autoSplit.Stroma1.Up	entrezgene	2192	ENSG00000077942	ENSG00000077942	2192	FBLN1
Stroma	1	Ignatiadis2012_autoSplit.Stroma1.Up	entrezgene	2200	ENSG00000166147	ENSG00000166147	2200	FBN1
Stroma	1	Ignatiadis2012_autoSplit.Stroma1.Up	entrezgene	23452	ENSG00000136859	ENSG00000136859	23452	ANGPTL2
Stroma	1	Ignatiadis2012_autoSplit.Stroma1.Up	entrezgene	25903	ENSG00000162745	ENSG00000162745	25903	OLFML2B
Stroma	1	Ignatiadis2012_autoSplit.Stroma1.Up	entrezgene	2619	ENSG00000180447	ENSG00000180447	2619	GAS1
Stroma	1	Ignatiadis2012_autoSplit.Stroma1.Up	entrezgene	4016	ENSG00000129038	ENSG00000129038	4016	LOXL1
Stroma	1	Ignatiadis2012_autoSplit.Stroma1.Up	entrezgene	4035	ENSG00000123384	ENSG00000123384	4035	LRP1
Stroma	1	Ignatiadis2012_autoSplit.Stroma1.Up	entrezgene	4237	ENSG00000117122	ENSG00000117122	4237	MFAP2
Stroma	1	Ignatiadis2012_autoSplit.Stroma1.Up	entrezgene	4313	ENSG00000087245	ENSG00000087245	4313	MMP2
Stroma	1	Ignatiadis2012_autoSplit.Stroma1.Up	entrezgene	4320	ENSG00000099953	ENSG00000099953	4320	MMP11
Stroma	1	Ignatiadis2012_autoSplit.Stroma1.Up	entrezgene	4323	ENSG00000157227	ENSG00000157227	4323	MMP14
Stroma	1	Ignatiadis2012_autoSplit.Stroma1.Up	entrezgene	4692	ENSG00000182636	ENSG00000182636	4692	NDN
Stroma	1	Ignatiadis2012_autoSplit.Stroma1.Up	entrezgene	5118	ENSG00000106333	ENSG00000106333	5118	PCOLCE
Stroma	1	Ignatiadis2012_autoSplit.Stroma1.Up	entrezgene	51226	ENSG00000005243	ENSG00000005243	51226	COPZ2
Stroma	1	Ignatiadis2012_autoSplit.Stroma1.Up	entrezgene	51339	ENSG00000165617	ENSG00000165617	51339	DACT1
Stroma	1	Ignatiadis2012_autoSplit.Stroma1.Up	entrezgene	5157	ENSG00000104213	ENSG00000104213	5157	PDGFRL
Stroma	1	Ignatiadis2012_autoSplit.Stroma1.Up	entrezgene	5159	ENSG00000113721	ENSG00000113721	5159	PDGFRB
Stroma	1	Ignatiadis2012_autoSplit.Stroma1.Up	entrezgene	5176	ENSG00000132386	ENSG00000132386	5176	SERPINF1
Stroma	1	Ignatiadis2012_autoSplit.Stroma1.Up	entrezgene	5328	ENSG00000122861	ENSG00000122861	5328	PLAU
Stroma	1	Ignatiadis2012_autoSplit.Stroma1.Up	entrezgene	54587	ENSG00000162576	ENSG00000162576	54587	MXRA8
Stroma	1	Ignatiadis2012_autoSplit.Stroma1.Up	entrezgene	54829	ENSG00000106819	ENSG00000106819	54829	ASPN
Stroma	1	Ignatiadis2012_autoSplit.Stroma1.Up	entrezgene	5654	ENSG00000166033	ENSG00000166033	5654	HTRA1
Stroma	1	Ignatiadis2012_autoSplit.Stroma1.Up	entrezgene	5919	ENSG00000106538	ENSG00000106538	5919	RARRES2
Stroma	1	Ignatiadis2012_autoSplit.Stroma1.Up	entrezgene	6424	ENSG00000106483	ENSG00000106483	6424	SFRP4
Stroma	1	Ignatiadis2012_autoSplit.Stroma1.Up	entrezgene	6591	ENSG00000019549	ENSG00000019549	6591	SNAI2
Stroma	1	Ignatiadis2012_autoSplit.Stroma1.Up	entrezgene	6678	ENSG00000113140	ENSG00000113140	6678	SPARC
Stroma	1	Ignatiadis2012_autoSplit.Stroma1.Up	entrezgene	7043	ENSG00000119699	ENSG00000119699	7043	TGFB3
Stroma	1	Ignatiadis2012_autoSplit.Stroma1.Up	entrezgene	7058	ENSG00000186340	ENSG00000186340	7058	THBS2
Stroma	1	Ignatiadis2012_autoSplit.Stroma1.Up	entrezgene	715	ENSG00000159403	--	--	--
Stroma	1	Ignatiadis2012_autoSplit.Stroma1.Up	entrezgene	800	ENSG00000122786	ENSG00000122786	800	CALD1
Stroma	1	Ignatiadis2012_autoSplit.Stroma1.Up	entrezgene	8038	ENSG00000148848	ENSG00000148848	8038	ADAM12
Stroma	1	Ignatiadis2012_autoSplit.Stroma1.Up	entrezgene	9358	ENSG00000198542	ENSG00000198542	9358	ITGBL1
Tcell	1	Tcell.PalmerSig	hgnc_symbol	AAK1	ENSG00000115977	ENSG00000115977	22848	AAK1
Tcell	1	Tcell.PalmerSig	hgnc_symbol	ACTN1	ENSG00000072110	ENSG00000072110	87	ACTN1
Tcell	1	Tcell.PalmerSig	hgnc_symbol	ACVR2B	ENSG00000114739	ENSG00000114739	93	ACVR2B
Tcell	1	Tcell.PalmerSig	hgnc_symbol	ADA	ENSG00000196839	ENSG00000196839	100	ADA
Tcell	1	Tcell.PalmerSig	hgnc_symbol	ANXA1	ENSG00000135046	ENSG00000135046	301	ANXA1
Tcell	1	Tcell.PalmerSig	hgnc_symbol	APBA2	ENSG00000034053	ENSG00000034053	321	APBA2
Tcell	1	Tcell.PalmerSig	hgnc_symbol	APOE	ENSG00000130203	ENSG00000130203	348	APOE
Tcell	1	Tcell.PalmerSig	hgnc_symbol	AQP3	ENSG00000165272	ENSG00000165272	360	AQP3
Tcell	1	Tcell.PalmerSig	hgnc_symbol	ATP1A1	ENSG00000163399	ENSG00000163399	476	ATP1A1
Tcell	1	Tcell.PalmerSig	hgnc_symbol	BAG3	ENSG00000151929	ENSG00000151929	9531	BAG3
Tcell	1	Tcell.PalmerSig	hgnc_symbol	BCL11B	ENSG00000127152	ENSG00000127152	64919	BCL11B
Tcell	1	Tcell.PalmerSig	hgnc_symbol	BIN2	ENSG00000110934	ENSG00000110934	51411	BIN2
Tcell	1	Tcell.PalmerSig	hgnc_symbol	BUB1B	ENSG00000156970	ENSG00000156970	701	PAK6
Tcell	1	Tcell.PalmerSig	hgnc_symbol	CAMK4	ENSG00000152495	ENSG00000152495	814	CAMK4
Tcell	1	Tcell.PalmerSig	hgnc_symbol	CCL5	ENSG00000271503	--	--	--
Tcell	1	Tcell.PalmerSig	hgnc_symbol	CCND2	ENSG00000118971	ENSG00000118971	894	CCND2
Tcell	1	Tcell.PalmerSig	hgnc_symbol	CD2	ENSG00000116824	ENSG00000116824	914	CD2
Tcell	1	Tcell.PalmerSig	hgnc_symbol	CD28	ENSG00000178562	ENSG00000178562	940	CD28
Tcell	1	Tcell.PalmerSig	hgnc_symbol	CD3D	ENSG00000167286	ENSG00000167286	915	CD3D
Tcell	1	Tcell.PalmerSig	hgnc_symbol	CD3E	ENSG00000198851	ENSG00000198851	916	CD3E
Tcell	1	Tcell.PalmerSig	hgnc_symbol	CD3G	ENSG00000160654	ENSG00000160654	917	CD3G
Tcell	1	Tcell.PalmerSig	hgnc_symbol	CD5	ENSG00000110448	ENSG00000110448	921	CD5
Tcell	1	Tcell.PalmerSig	hgnc_symbol	CD6	ENSG00000013725	ENSG00000013725	923	CD6
Tcell	1	Tcell.PalmerSig	hgnc_symbol	CDC14A	ENSG00000079335	ENSG00000079335	8556	CDC14A
Tcell	1	Tcell.PalmerSig	hgnc_symbol	CDC25B	ENSG00000101224	ENSG00000101224	994	CDC25B
Tcell	1	Tcell.PalmerSig	hgnc_symbol	CDR2	ENSG00000140743	ENSG00000140743	1039	CDR2
Tcell	1	Tcell.PalmerSig	hgnc_symbol	CISH	ENSG00000114737	ENSG00000114737	1154	CISH
Tcell	1	Tcell.PalmerSig	hgnc_symbol	CTSW	ENSG00000172543	ENSG00000172543	1521	CTSW
Tcell	1	Tcell.PalmerSig	hgnc_symbol	DNAJB1	ENSG00000132002	ENSG00000132002	3337	DNAJB1
Tcell	1	Tcell.PalmerSig	hgnc_symbol	DNASE1L3	ENSG00000163687	ENSG00000163687	1776	DNASE1L3
Tcell	1	Tcell.PalmerSig	hgnc_symbol	DOCK9	ENSG00000088387	ENSG00000088387	23348	DOCK9
Tcell	1	Tcell.PalmerSig	hgnc_symbol	DPP4	ENSG00000197635	ENSG00000197635	1803	DPP4
Tcell	1	Tcell.PalmerSig	hgnc_symbol	DUSP16	ENSG00000111266	ENSG00000111266	80824	DUSP16
Tcell	1	Tcell.PalmerSig	hgnc_symbol	DUSP2	ENSG00000158050	ENSG00000158050	1844	DUSP2
Tcell	1	Tcell.PalmerSig	hgnc_symbol	FBLN5	ENSG00000140092	ENSG00000140092	10516	FBLN5
Tcell	1	Tcell.PalmerSig	hgnc_symbol	FHIT	ENSG00000189283	--	--	--
Tcell	1	Tcell.PalmerSig	hgnc_symbol	FLT3LG	ENSG00000090554	ENSG00000090554	2323	FLT3LG
Tcell	1	Tcell.PalmerSig	hgnc_symbol	FYB	ENSG00000082074	ENSG00000082074	2533	FYB
Tcell	1	Tcell.PalmerSig	hgnc_symbol	FYN	ENSG00000010810	ENSG00000010810	2534	FYN
Tcell	1	Tcell.PalmerSig	hgnc_symbol	GABARAPL1	ENSG00000139112	ENSG00000139112	23710	GABARAPL1
Tcell	1	Tcell.PalmerSig	hgnc_symbol	GALT	ENSG00000213930	ENSG00000213930	2592	GALT
Tcell	1	Tcell.PalmerSig	hgnc_symbol	GATA3	ENSG00000107485	ENSG00000107485	2625	GATA3
Tcell	1	Tcell.PalmerSig	hgnc_symbol	GBP1	ENSG00000117228	ENSG00000117228	2633	GBP1
Tcell	1	Tcell.PalmerSig	hgnc_symbol	GBP2	ENSG00000162645	ENSG00000162645	2634	GBP2
Tcell	1	Tcell.PalmerSig	hgnc_symbol	GFI1	ENSG00000162676	ENSG00000162676	2672	GFI1
Tcell	1	Tcell.PalmerSig	hgnc_symbol	GIMAP2	ENSG00000106560	ENSG00000106560	26157	GIMAP2
Tcell	1	Tcell.PalmerSig	hgnc_symbol	GIMAP4	ENSG00000133574	ENSG00000133574	55303	GIMAP4
Tcell	1	Tcell.PalmerSig	hgnc_symbol	GPSM3	ENSG00000213654	--	--	--
Tcell	1	Tcell.PalmerSig	hgnc_symbol	GZMK	ENSG00000113088	ENSG00000113088	3003	GZMK
Tcell	1	Tcell.PalmerSig	hgnc_symbol	HOXB2	ENSG00000173917	ENSG00000173917	3212	HOXB2
Tcell	1	Tcell.PalmerSig	hgnc_symbol	HSPA1L	ENSG00000204390	--	--	--
Tcell	1	Tcell.PalmerSig	hgnc_symbol	ID2	ENSG00000115738	ENSG00000115738	3398	ID2
Tcell	1	Tcell.PalmerSig	hgnc_symbol	IFITM1	ENSG00000185885	ENSG00000185885	8519	IFITM1
Tcell	1	Tcell.PalmerSig	hgnc_symbol	IL18R1	ENSG00000115604	ENSG00000115604	8809	IL18R1
Tcell	1	Tcell.PalmerSig	hgnc_symbol	IL6R	ENSG00000160712	ENSG00000160712	3570	IL6R
Tcell	1	Tcell.PalmerSig	hgnc_symbol	IL6ST	ENSG00000134352	ENSG00000134352	3572	IL6ST
Tcell	1	Tcell.PalmerSig	hgnc_symbol	IL7R	ENSG00000168685	ENSG00000168685	3575	IL7R
Tcell	1	Tcell.PalmerSig	hgnc_symbol	INPP4A	ENSG00000040933	ENSG00000040933	3631	INPP4A
Tcell	1	Tcell.PalmerSig	hgnc_symbol	INPP4B	ENSG00000109452	ENSG00000109452	8821	INPP4B
Tcell	1	Tcell.PalmerSig	hgnc_symbol	ITGA6	ENSG00000091409	ENSG00000091409	3655	ITGA6
Tcell	1	Tcell.PalmerSig	hgnc_symbol	ITK	ENSG00000113263	ENSG00000113263	3702	ITK
Tcell	1	Tcell.PalmerSig	hgnc_symbol	ITM2A	ENSG00000078596	ENSG00000078596	9452	ITM2A
Tcell	1	Tcell.PalmerSig	hgnc_symbol	ITPKB	ENSG00000143772	ENSG00000143772	3707	ITPKB
Tcell	1	Tcell.PalmerSig	hgnc_symbol	KLRB1	ENSG00000111796	ENSG00000111796	3820	KLRB1
Tcell	1	Tcell.PalmerSig	hgnc_symbol	KLRG1	ENSG00000139187	ENSG00000139187	10219	KLRG1
Tcell	1	Tcell.PalmerSig	hgnc_symbol	KLRK1	ENSG00000213809	--	--	--
Tcell	1	Tcell.PalmerSig	hgnc_symbol	LAT	ENSG00000213658	ENSG00000213658	27040	LAT
Tcell	1	Tcell.PalmerSig	hgnc_symbol	LCK	ENSG00000182866	ENSG00000182866	3932	LCK
Tcell	1	Tcell.PalmerSig	hgnc_symbol	LCP2	ENSG00000043462	ENSG00000043462	3937	LCP2
Tcell	1	Tcell.PalmerSig	hgnc_symbol	LDHA	ENSG00000134333	ENSG00000134333	3939	LDHA
Tcell	1	Tcell.PalmerSig	hgnc_symbol	LDHB	ENSG00000111716	ENSG00000111716	3945	LDHB
Tcell	1	Tcell.PalmerSig	hgnc_symbol	LEF1	ENSG00000138795	ENSG00000138795	51176	LEF1
Tcell	1	Tcell.PalmerSig	hgnc_symbol	LEPROTL1	ENSG00000104660	ENSG00000104660	23484	LEPROTL1
Tcell	1	Tcell.PalmerSig	hgnc_symbol	LPIN2	ENSG00000101577	ENSG00000101577	9663	LPIN2
Tcell	1	Tcell.PalmerSig	hgnc_symbol	LRIG1	ENSG00000144749	ENSG00000144749	26018	LRIG1
Tcell	1	Tcell.PalmerSig	hgnc_symbol	LTBP4	ENSG00000090006	ENSG00000090006	8425	LTBP4
Tcell	1	Tcell.PalmerSig	hgnc_symbol	LYAR	ENSG00000145220	ENSG00000145220	55646	LYAR
Tcell	1	Tcell.PalmerSig	hgnc_symbol	MAL	ENSG00000172005	ENSG00000172005	4118	MAL
Tcell	1	Tcell.PalmerSig	hgnc_symbol	MAN1C1	ENSG00000117643	ENSG00000117643	57134	MAN1C1
Tcell	1	Tcell.PalmerSig	hgnc_symbol	MAPKAPK5	ENSG00000089022	ENSG00000089022	8550	MAPKAPK5
Tcell	1	Tcell.PalmerSig	hgnc_symbol	MAST4	ENSG00000069020	ENSG00000069020	375449	MAST4
Tcell	1	Tcell.PalmerSig	hgnc_symbol	MATN2	ENSG00000132561	ENSG00000132561	4147	MATN2
Tcell	1	Tcell.PalmerSig	hgnc_symbol	MEN1	ENSG00000133895	ENSG00000133895	4221	MEN1
Tcell	1	Tcell.PalmerSig	hgnc_symbol	MLLT3	ENSG00000171843	--	--	--
Tcell	1	Tcell.PalmerSig	hgnc_symbol	MPP7	ENSG00000150054	ENSG00000150054	143098	MPP7
Tcell	1	Tcell.PalmerSig	hgnc_symbol	MYBL1	ENSG00000185697	ENSG00000185697	4603	MYBL1
Tcell	1	Tcell.PalmerSig	hgnc_symbol	NELL2	ENSG00000184613	ENSG00000184613	4753	NELL2
Tcell	1	Tcell.PalmerSig	hgnc_symbol	NGFRAP1	ENSG00000166681	ENSG00000166681	27018	NGFRAP1
Tcell	1	Tcell.PalmerSig	hgnc_symbol	NPDC1	ENSG00000107281	ENSG00000107281	56654	NPDC1
Tcell	1	Tcell.PalmerSig	hgnc_symbol	NPTXR	ENSG00000221890	ENSG00000221890	23467	NPTXR
Tcell	1	Tcell.PalmerSig	hgnc_symbol	NR4A2	ENSG00000153234	ENSG00000153234	4929	NR4A2
Tcell	1	Tcell.PalmerSig	hgnc_symbol	OPTN	ENSG00000123240	ENSG00000123240	10133	OPTN
Tcell	1	Tcell.PalmerSig	hgnc_symbol	PCSK5	ENSG00000099139	ENSG00000099139	5125	PCSK5
Tcell	1	Tcell.PalmerSig	hgnc_symbol	PCYT2	ENSG00000185813	ENSG00000185813	5833	PCYT2
Tcell	1	Tcell.PalmerSig	hgnc_symbol	PDE4D	ENSG00000113448	ENSG00000113448	5144	PDE4D
Tcell	1	Tcell.PalmerSig	hgnc_symbol	PDE9A	ENSG00000160191	ENSG00000160191	5152	PDE9A
Tcell	1	Tcell.PalmerSig	hgnc_symbol	PIK3R1	ENSG00000145675	ENSG00000145675	5295	PIK3R1
Tcell	1	Tcell.PalmerSig	hgnc_symbol	PIM1	ENSG00000137193	ENSG00000137193	5292	PIM1
Tcell	1	Tcell.PalmerSig	hgnc_symbol	PLXDC1	ENSG00000161381	ENSG00000161381	57125	PLXDC1
Tcell	1	Tcell.PalmerSig	hgnc_symbol	PRKCA	ENSG00000154229	ENSG00000154229	5578	PRKCA
Tcell	1	Tcell.PalmerSig	hgnc_symbol	PRKCI	ENSG00000163558	ENSG00000163558	5584	PRKCI
Tcell	1	Tcell.PalmerSig	hgnc_symbol	PRKCQ	ENSG00000065675	ENSG00000065675	5588	PRKCQ
Tcell	1	Tcell.PalmerSig	hgnc_symbol	PTGER2	ENSG00000125384	ENSG00000125384	5732	PTGER2
Tcell	1	Tcell.PalmerSig	hgnc_symbol	PXN	ENSG00000089159	--	--	--
Tcell	1	Tcell.PalmerSig	hgnc_symbol	RAB43	ENSG00000172780	ENSG00000172780	339122	RAB43
Tcell	1	Tcell.PalmerSig	hgnc_symbol	RARRES3	ENSG00000133321	ENSG00000133321	5920	RARRES3
Tcell	1	Tcell.PalmerSig	hgnc_symbol	RASGRP1	ENSG00000172575	ENSG00000172575	10125	RASGRP1
Tcell	1	Tcell.PalmerSig	hgnc_symbol	RBMS1	ENSG00000153250	ENSG00000153250	5937	RBMS1
Tcell	1	Tcell.PalmerSig	hgnc_symbol	RGS10	ENSG00000148908	ENSG00000148908	6001	RGS10
Tcell	1	Tcell.PalmerSig	hgnc_symbol	RORA	ENSG00000069667	ENSG00000069667	6095	RORA
Tcell	1	Tcell.PalmerSig	hgnc_symbol	RUNX2	ENSG00000124813	ENSG00000124813	860	RUNX2
Tcell	1	Tcell.PalmerSig	hgnc_symbol	S100A10	ENSG00000197747	ENSG00000197747	6281	S100A10
Tcell	1	Tcell.PalmerSig	hgnc_symbol	S100A8	ENSG00000143546	ENSG00000143546	6279	S100A8
Tcell	1	Tcell.PalmerSig	hgnc_symbol	SATB1	ENSG00000182568	ENSG00000182568	6304	SATB1
Tcell	1	Tcell.PalmerSig	hgnc_symbol	SELPLG	ENSG00000110876	ENSG00000110876	6404	SELPLG
Tcell	1	Tcell.PalmerSig	hgnc_symbol	SEMA4D	ENSG00000187764	ENSG00000187764	10507	SEMA4D
Tcell	1	Tcell.PalmerSig	hgnc_symbol	SH2D1A	ENSG00000183918	ENSG00000183918	4068	SH2D1A
Tcell	1	Tcell.PalmerSig	hgnc_symbol	SHFM1	ENSG00000127922	ENSG00000127922	7979	SHFM1
Tcell	1	Tcell.PalmerSig	hgnc_symbol	SLC35D2	ENSG00000130958	ENSG00000130958	11046	SLC35D2
Tcell	1	Tcell.PalmerSig	hgnc_symbol	SLC39A8	ENSG00000138821	ENSG00000138821	64116	SLC39A8
Tcell	1	Tcell.PalmerSig	hgnc_symbol	SLCO3A1	ENSG00000176463	ENSG00000176463	28232	SLCO3A1
Tcell	1	Tcell.PalmerSig	hgnc_symbol	SNPH	ENSG00000101298	ENSG00000101298	9751	SNPH
Tcell	1	Tcell.PalmerSig	hgnc_symbol	SOCS3	ENSG00000184557	ENSG00000184557	9021	SOCS3
Tcell	1	Tcell.PalmerSig	hgnc_symbol	SORL1	ENSG00000137642	ENSG00000137642	6653	SORL1
Tcell	1	Tcell.PalmerSig	hgnc_symbol	SPOCK2	ENSG00000107742	ENSG00000107742	9806	SPOCK2
Tcell	1	Tcell.PalmerSig	hgnc_symbol	STAT4	ENSG00000138378	ENSG00000138378	6775	STAT4
Tcell	1	Tcell.PalmerSig	hgnc_symbol	SYNE2	ENSG00000054654	ENSG00000054654	23224	SYNE2
Tcell	1	Tcell.PalmerSig	hgnc_symbol	SYT1	ENSG00000067715	ENSG00000067715	6857	SYT1
Tcell	1	Tcell.PalmerSig	hgnc_symbol	TACC3	ENSG00000013810	ENSG00000013810	10460	TACC3
Tcell	1	Tcell.PalmerSig	hgnc_symbol	TCF7	ENSG00000081059	ENSG00000081059	6932	TCF7
Tcell	1	Tcell.PalmerSig	hgnc_symbol	TIAM1	ENSG00000156299	ENSG00000156299	7074	TIAM1
Tcell	1	Tcell.PalmerSig	hgnc_symbol	TNFAIP3	ENSG00000118503	ENSG00000118503	7128	TNFAIP3
Tcell	1	Tcell.PalmerSig	hgnc_symbol	TNFRSF25	ENSG00000215788	ENSG00000215788	8718	TNFRSF25
Tcell	1	Tcell.PalmerSig	hgnc_symbol	TNFSF8	ENSG00000106952	ENSG00000106952	944	TNFSF8
Tcell	1	Tcell.PalmerSig	hgnc_symbol	TNIK	ENSG00000154310	ENSG00000154310	23043	TNIK
Tcell	1	Tcell.PalmerSig	hgnc_symbol	TOB1	ENSG00000141232	ENSG00000141232	10140	TOB1
Tcell	1	Tcell.PalmerSig	hgnc_symbol	TRERF1	ENSG00000124496	ENSG00000124496	55809	TRERF1
Tcell	1	Tcell.PalmerSig	hgnc_symbol	TXK	ENSG00000074966	ENSG00000074966	7294	TXK
Tcell	1	Tcell.PalmerSig	hgnc_symbol	UPP1	ENSG00000183696	ENSG00000183696	7378	UPP1
Tcell	1	Tcell.PalmerSig	hgnc_symbol	VIPR1	ENSG00000114812	ENSG00000114812	7433	VIPR1
Tcell	1	Tcell.PalmerSig	hgnc_symbol	WNT10B	ENSG00000169884	ENSG00000169884	7480	WNT10B
Tcell	1	Tcell.PalmerSig	hgnc_symbol	WWP1	ENSG00000123124	ENSG00000123124	11059	WWP1
Tcell	1	Tcell.PalmerSig	hgnc_symbol	ZAP70	ENSG00000115085	ENSG00000115085	7535	ZAP70
MS_residual	1	Cr2009.Up	affy_hg_u133_plus_2	223082_at	ENSG00000147010	ENSG00000147010	30011	SH3KBP1
MS_residual	1	Cr2009.Up	affy_hg_u133_plus_2	231403_at	ENSG00000038382	ENSG00000038382	7204	TRIO
MS_residual	1	Cr2009.Up	affy_hg_u133_plus_2	1556625_a_at	ENSG00000269938	--	--	--
MS_residual	1	Cr2009.Up	affy_hg_u133_plus_2	203320_at	ENSG00000111252	ENSG00000111252	10019	SH2B3
MS_residual	1	Cr2009.Up	affy_hg_u133_plus_2	218175_at	ENSG00000119242	ENSG00000119242	80212	CCDC92
MS_residual	1	Cr2009.Up	affy_hg_u133_plus_2	202861_at	ENSG00000179094	ENSG00000179094	5187	PER1
MS_residual	1	Cr2009.Up	affy_hg_u133_plus_2	230077_at	ENSG00000214135 // ENSG00000242086 // ENSG00000185485	--	--	--
MS_residual	1	Cr2009.Up	affy_hg_u133_plus_2	231735_s_at // 223577_x_at	ENSG00000279576	--	--	--
MS_residual	1	Cr2009.Up	affy_hg_u133_plus_2	227336_at	ENSG00000135144	ENSG00000135144	1840	DTX1
MS_residual	1	Cr2009.Up	affy_hg_u133_plus_2	210281_s_at // 210282_at	ENSG00000121741	ENSG00000121741	7750	ZMYM2
MS_residual	1	Cr2009.Up	affy_hg_u133_plus_2	212691_at	ENSG00000095319	ENSG00000095319	23511	NUP188
MS_residual	1	Cr2009.Up	affy_hg_u133_plus_2	215813_s_at // 205128_x_at // 238669_at	ENSG00000095303	ENSG00000095303	5742	PTGS1
MS_residual	1	Cr2009.Up	affy_hg_u133_plus_2	200953_s_at	ENSG00000118971	ENSG00000118971	894	CCND2
MS_residual	1	Cr2009.Up	affy_hg_u133_plus_2	202910_s_at	ENSG00000123146	ENSG00000123146	976	CD97
MS_residual	1	Cr2009.Up	affy_hg_u133_plus_2	205468_s_at	ENSG00000128604	ENSG00000128604	3663	IRF5
MS_residual	1	Cr2009.Up	affy_hg_u133_plus_2	205351_at	ENSG00000115486	ENSG00000115486	2677	GGCX
MS_residual	1	Cr2009.Up	affy_hg_u133_plus_2	1568915_at	ENSG00000230454	--	--	--
MS_residual	1	Cr2009.Up	affy_hg_u133_plus_2	215116_s_at	ENSG00000106976	ENSG00000106976	1759	DNM1
MS_residual	1	Cr2009.Up	affy_hg_u133_plus_2	214859_at	ENSG00000053108	ENSG00000053108	23105	FSTL4
MS_residual	1	Cr2009.Up	affy_hg_u133_plus_2	206965_at	ENSG00000118922	ENSG00000118922	11278	KLF12
MS_residual	1	Cr2009.Up	affy_hg_u133_plus_2	238226_at	ENSG00000184497	ENSG00000184497	348013	FAM70B
MS_residual	1	Cr2009.Up	affy_hg_u133_plus_2	229036_at	ENSG00000100354	ENSG00000100354	23112	TNRC6B
MS_residual	1	Cr2009.Up	affy_hg_u133_plus_2	203916_at	ENSG00000272916 // ENSG00000166507	--	--	--
MS_residual	1	Cr2009.Up	affy_hg_u133_plus_2	209075_s_at	ENSG00000136003	ENSG00000136003	23479	ISCU
MS_residual	1	Cr2009.Up	affy_hg_u133_plus_2	203921_at	ENSG00000175040	ENSG00000175040	9435	CHST2
MS_residual	1	Cr2009.Up	affy_hg_u133_plus_2	221269_s_at	ENSG00000142669	ENSG00000142669	83442	SH3BGRL3
MS_residual	1	Cr2009.Up	affy_hg_u133_plus_2	201959_s_at	ENSG00000005810	ENSG00000005810	23077	MYCBP2
MS_residual	1	Cr2009.Up	affy_hg_u133_plus_2	228911_at	ENSG00000261143 // ENSG00000136378	--	--	--
MS_residual	1	Cr2009.Up	affy_hg_u133_plus_2	201426_s_at	ENSG00000026025	ENSG00000026025	7431	VIM
MS_residual	1	Cr2009.Up	affy_hg_u133_plus_2	226694_at	ENSG00000241978 // ENSG00000157654	--	--	--
MS_residual	1	Cr2009.Up	affy_hg_u133_plus_2	36030_at	ENSG00000010295	ENSG00000010295	25900	IFFO1
MS_residual	1	Cr2009.Up	affy_hg_u133_plus_2	221832_s_at	ENSG00000169641	ENSG00000169641	7798	LUZP1
MS_residual	1	Cr2009.Up	affy_hg_u133_plus_2	233986_s_at	ENSG00000090924	ENSG00000090924	64857	PLEKHG2
MS_residual	1	Cr2009.Up	affy_hg_u133_plus_2	212225_at	ENSG00000173812	ENSG00000173812	10209	EIF1
MS_residual	1	Cr2009.Up	affy_hg_u133_plus_2	225669_at	ENSG00000142166	ENSG00000142166	3454	IFNAR1
MS_residual	1	Cr2009.Up	affy_hg_u133_plus_2	243709_at	ENSG00000177058	ENSG00000177058	153129	SLC38A9
MS_residual	1	Cr2009.Up	affy_hg_u133_plus_2	203939_at	ENSG00000135318	ENSG00000135318	4907	NT5E
MS_residual	1	Cr2009.Up	affy_hg_u133_plus_2	202191_s_at	ENSG00000007237	ENSG00000007237	8522	GAS7
MS_residual	1	Cr2009.Up	affy_hg_u133_plus_2	202369_s_at	ENSG00000065308	ENSG00000065308	9697	TRAM2
MS_residual	1	Cr2009.Up	affy_hg_u133_plus_2	225390_s_at	ENSG00000169926	ENSG00000169926	51621	KLF13
MS_residual	1	Cr2009.Up	affy_hg_u133_plus_2	206968_s_at	ENSG00000170322	ENSG00000170322	4798	NFRKB
MS_residual	1	Cr2009.Up	affy_hg_u133_plus_2	212024_x_at	ENSG00000177731	ENSG00000177731	2314	FLII
MS_residual	1	Cr2009.Up	affy_hg_u133_plus_2	206571_s_at // 222548_s_at	ENSG00000071054	ENSG00000071054	9448	MAP4K4
MS_residual	1	Cr2009.Up	affy_hg_u133_plus_2	225524_at	ENSG00000163297	ENSG00000163297	118429	ANTXR2
MS_residual	1	Cr2009.Up	affy_hg_u133_plus_2	225793_at	ENSG00000271601	--	--	--
MS_residual	1	Cr2009.Up	affy_hg_u133_plus_2	212660_at	ENSG00000043143	ENSG00000043143	23338	PHF15
MS_residual	1	Cr2009.Up	affy_hg_u133_plus_2	232204_at	ENSG00000164330	ENSG00000164330	1879	EBF1
MS_residual	1	Cr2009.Up	affy_hg_u133_plus_2	215716_s_at	ENSG00000070961	ENSG00000070961	490	ATP2B1
MS_residual	1	Cr2009.Up	affy_hg_u133_plus_2	203729_at	ENSG00000142227	ENSG00000142227	2014	EMP3
MS_residual	1	Cr2009.Up	affy_hg_u133_plus_2	232527_at	ENSG00000163635	--	--	--
MS_residual	1	Cr2009.Up	affy_hg_u133_plus_2	230740_at	ENSG00000013016	--	--	--
MS_residual	1	Cr2009.Up	affy_hg_u133_plus_2	206756_at	ENSG00000147119	ENSG00000147119	56548	CHST7
MS_residual	1	Cr2009.Up	affy_hg_u133_plus_2	224840_at // 224856_at	ENSG00000096060	ENSG00000096060	2289	FKBP5
MS_residual	1	Cr2009.Up	affy_hg_u133_plus_2	226372_at	ENSG00000171310	--	--	--
MS_residual	1	Cr2009.Up	affy_hg_u133_plus_2	210105_s_at	ENSG00000010810	ENSG00000010810	2534	FYN
MS_residual	1	Cr2009.Up	affy_hg_u133_plus_2	202391_at	ENSG00000176788	ENSG00000176788	10409	BASP1
MS_residual	1	Cr2009.Up	affy_hg_u133_plus_2	221890_at	ENSG00000198026	ENSG00000198026	63925	ZNF335
MS_residual	1	Cr2009.Up	affy_hg_u133_plus_2	244511_at	ENSG00000178104	--	--	--
MS_residual	1	Cr2009.Up	affy_hg_u133_plus_2	204735_at	ENSG00000065989	ENSG00000065989	5141	PDE4A
MS_residual	1	Cr2009.Up	affy_hg_u133_plus_2	219563_at	ENSG00000176438	ENSG00000176438	161176	C14orf49
MS_residual	1	Cr2009.Up	affy_hg_u133_plus_2	213436_at	ENSG00000118432	ENSG00000118432	1268	CNR1
MS_residual	1	Cr2009.Up	affy_hg_u133_plus_2	203409_at	ENSG00000134574	ENSG00000134574	1643	DDB2
MS_residual	1	Cr2009.Up	affy_hg_u133_plus_2	224252_s_at // 218084_x_at	ENSG00000089327	ENSG00000089327	53827	FXYD5
MS_residual	1	Cr2009.Up	affy_hg_u133_plus_2	215579_at	ENSG00000239713	ENSG00000239713	60489	APOBEC3G
MS_residual	1	Cr2009.Up	affy_hg_u133_plus_2	212895_s_at	ENSG00000159842	ENSG00000159842	29	ABR
MS_residual	1	Cr2009.Up	affy_hg_u133_plus_2	223276_at	ENSG00000256235	ENSG00000256235	85027	C5orf62
MS_residual	1	Cr2009.Up	affy_hg_u133_plus_2	213725_x_at	ENSG00000103489	ENSG00000103489	64131	XYLT1
MS_residual	1	Cr2009.Up	affy_hg_u133_plus_2	34221_at	ENSG00000113716	--	--	--
MS_residual	1	Cr2009.Up	affy_hg_u133_plus_2	202887_s_at	ENSG00000168209	ENSG00000168209	54541	DDIT4
MS_residual	1	Cr2009.Up	affy_hg_u133_plus_2	204920_at	ENSG00000021826	ENSG00000021826	1373	CPS1
MS_residual	1	Cr2009.Up	affy_hg_u133_plus_2	202725_at	ENSG00000181222	ENSG00000181222	5430	POLR2A
MS_residual	1	Cr2009.Up	affy_hg_u133_plus_2	242866_x_at	ENSG00000028277	ENSG00000028277	5452	POU2F2
MS_residual	1	Cr2009.Up	affy_hg_u133_plus_2	225097_at	ENSG00000064393	ENSG00000064393	28996	HIPK2
MS_residual	1	Cr2009.Up	affy_hg_u133_plus_2	205883_at	ENSG00000109906	ENSG00000109906	7704	ZBTB16
MS_residual	1	Cr2009.Up	affy_hg_u133_plus_2	202723_s_at	ENSG00000150907	ENSG00000150907	2308	FOXO1
MS_residual	1	Cr2009.Up	affy_hg_u133_plus_2	210201_x_at // 202931_x_at // 214439_x_at	ENSG00000136717	ENSG00000136717	274	BIN1
MS_residual	1	Cr2009.Up	affy_hg_u133_plus_2	235595_at	ENSG00000116584	ENSG00000116584	9181	ARHGEF2
MS_residual	1	Cr2009.Up	affy_hg_u133_plus_2	208102_s_at	ENSG00000059915	ENSG00000059915	5662	PSD
MS_residual	1	Cr2009.Up	affy_hg_u133_plus_2	230015_at	ENSG00000214140	ENSG00000214140	768206	PRCD
MS_residual	1	Cr2009.Up	affy_hg_u133_plus_2	217473_x_at	ENSG00000018280	ENSG00000018280	6556	SLC11A1
MS_residual	1	Cr2009.Up	affy_hg_u133_plus_2	212413_at // 212414_s_at	ENSG00000125354	ENSG00000125354	23157	SEPT6
MS_residual	1	Cr2009.Up	affy_hg_u133_plus_2	232031_s_at // 232030_at	ENSG00000152223	ENSG00000152223	57724	EPG5
MS_residual	1	Cr2009.Up	affy_hg_u133_plus_2	210380_s_at	ENSG00000006283	ENSG00000006283	8913	CACNA1G
MS_residual	1	Cr2009.Up	affy_hg_u133_plus_2	216230_x_at	ENSG00000166311	ENSG00000166311	6609	SMPD1
MS_residual	-1	Cr2009.Down	affy_hg_u133_plus_2	224789_at	ENSG00000198876	ENSG00000198876	25853	DCAF12
MS_residual	-1	Cr2009.Down	affy_hg_u133_plus_2	226302_at	ENSG00000081923	ENSG00000081923	5205	ATP8B1
MS_residual	-1	Cr2009.Down	affy_hg_u133_plus_2	205033_s_at	ENSG00000206047 // ENSG00000240247 // ENSG00000239839	--	--	--
MS_residual	-1	Cr2009.Down	affy_hg_u133_plus_2	217551_at	ENSG00000184669	ENSG00000184669	10819	OR7E14P
MS_residual	-1	Cr2009.Down	affy_hg_u133_plus_2	201548_s_at	ENSG00000117139	ENSG00000117139	10765	KDM5B
MS_residual	-1	Cr2009.Down	affy_hg_u133_plus_2	226185_at // 205709_s_at	ENSG00000163624	ENSG00000163624	1040	CDS1
MS_residual	-1	Cr2009.Down	affy_hg_u133_plus_2	226755_at	ENSG00000276335 // ENSG00000230937	--	--	--
MS_residual	-1	Cr2009.Down	affy_hg_u133_plus_2	236385_at	ENSG00000166664 // ENSG00000175344	--	--	--
MS_residual	-1	Cr2009.Down	affy_hg_u133_plus_2	204750_s_at	ENSG00000134755	ENSG00000134755	1824	DSC2
MS_residual	-1	Cr2009.Down	affy_hg_u133_plus_2	204679_at	ENSG00000135750	ENSG00000135750	3775	KCNK1
MS_residual	-1	Cr2009.Down	affy_hg_u133_plus_2	202890_at	ENSG00000276943 // ENSG00000135525	--	--	--
MS_residual	-1	Cr2009.Down	affy_hg_u133_plus_2	225589_at	ENSG00000154447	ENSG00000154447	57630	SH3RF1
MS_residual	-1	Cr2009.Down	affy_hg_u133_plus_2	202597_at	ENSG00000117595	ENSG00000117595	3664	IRF6
MS_residual	-1	Cr2009.Down	affy_hg_u133_plus_2	225728_at	ENSG00000154556	ENSG00000154556	8470	SORBS2
MS_residual	-1	Cr2009.Down	affy_hg_u133_plus_2	211208_s_at	ENSG00000147044	ENSG00000147044	8573	CASK
MS_residual	-1	Cr2009.Down	affy_hg_u133_plus_2	220354_at	ENSG00000235280	--	--	--
MS_residual	-1	Cr2009.Down	affy_hg_u133_plus_2	219596_at	ENSG00000129028	--	--	--
MS_residual	-1	Cr2009.Down	affy_hg_u133_plus_2	225911_at	ENSG00000168743	ENSG00000168743	255743	NPNT
MS_residual	-1	Cr2009.Down	affy_hg_u133_plus_2	229242_at	ENSG00000181634	ENSG00000181634	9966	TNFSF15
MS_residual	-1	Cr2009.Down	affy_hg_u133_plus_2	219995_s_at	ENSG00000141579	ENSG00000141579	79755	ZNF750
MS_residual	-1	Cr2009.Down	affy_hg_u133_plus_2	204005_s_at // 226231_at	ENSG00000177425	ENSG00000177425	5074	PAWR
MS_residual	-1	Cr2009.Down	affy_hg_u133_plus_2	238029_s_at	ENSG00000163053	ENSG00000163053	151473	SLC16A14
MS_residual	-1	Cr2009.Down	affy_hg_u133_plus_2	218693_at	ENSG00000099282	ENSG00000099282	23555	TSPAN15
MS_residual	-1	Cr2009.Down	affy_hg_u133_plus_2	204656_at // 1557458_s_at	ENSG00000107338	ENSG00000107338	6461	SHB
MS_residual	-1	Cr2009.Down	affy_hg_u133_plus_2	205505_at	ENSG00000187210	ENSG00000187210	2650	GCNT1
MS_residual	-1	Cr2009.Down	affy_hg_u133_plus_2	35666_at	ENSG00000001617	ENSG00000001617	6405	SEMA3F
MS_residual	-1	Cr2009.Down	affy_hg_u133_plus_2	203439_s_at	ENSG00000113739	ENSG00000113739	8614	STC2
MS_residual	-1	Cr2009.Down	affy_hg_u133_plus_2	201291_s_at	ENSG00000131747	ENSG00000131747	7153	TOP2A
MS_residual	-1	Cr2009.Down	affy_hg_u133_plus_2	235148_at	ENSG00000157992	ENSG00000157992	200634	KRTCAP3
MS_residual	-1	Cr2009.Down	affy_hg_u133_plus_2	207877_s_at	ENSG00000143748	ENSG00000143748	4931	NVL
MS_residual	-1	Cr2009.Down	affy_hg_u133_plus_2	202743_at	ENSG00000117461	ENSG00000117461	8503	PIK3R3
MS_residual	-1	Cr2009.Down	affy_hg_u133_plus_2	223315_at	ENSG00000074527	ENSG00000074527	59277	NTN4
MS_residual	-1	Cr2009.Down	affy_hg_u133_plus_2	223231_at	ENSG00000147687 // ENSG00000234369	--	--	--
MS_residual	-1	Cr2009.Down	affy_hg_u133_plus_2	230788_at	ENSG00000111846	ENSG00000111846	2651	GCNT2
MS_residual	-1	Cr2009.Down	affy_hg_u133_plus_2	235337_at // 230660_at	ENSG00000082497	ENSG00000082497	56256	SERTAD4
MS_residual	-1	Cr2009.Down	affy_hg_u133_plus_2	218326_s_at	ENSG00000205213	ENSG00000205213	55366	LGR4
MS_residual	-1	Cr2009.Down	affy_hg_u133_plus_2	204962_s_at	ENSG00000115163	ENSG00000115163	1058	CENPA
MS_residual	-1	Cr2009.Down	affy_hg_u133_plus_2	213285_at	ENSG00000182107	ENSG00000182107	161291	TMEM30B
MS_residual	-1	Cr2009.Down	affy_hg_u133_plus_2	203002_at	ENSG00000114019	ENSG00000114019	51421	AMOTL2
MS_residual	-1	Cr2009.Down	affy_hg_u133_plus_2	236399_at	ENSG00000238005	--	--	--
MS_residual	-1	Cr2009.Down	affy_hg_u133_plus_2	206346_at // 227629_at	ENSG00000113494	ENSG00000113494	5618	PRLR
MS_residual	-1	Cr2009.Down	affy_hg_u133_plus_2	214745_at	ENSG00000114805	ENSG00000114805	23007	PLCH1
MS_residual	-1	Cr2009.Down	affy_hg_u133_plus_2	224218_s_at // 218502_s_at	ENSG00000104447	ENSG00000104447	7227	TRPS1
MS_residual	-1	Cr2009.Down	affy_hg_u133_plus_2	226770_at	ENSG00000081026	ENSG00000081026	260425	MAGI3
MS_residual	-1	Cr2009.Down	affy_hg_u133_plus_2	229599_at	ENSG00000267795	--	--	--
MS_residual	-1	Cr2009.Down	affy_hg_u133_plus_2	217191_x_at	ENSG00000260318	--	--	--
MS_residual	-1	Cr2009.Down	affy_hg_u133_plus_2	210993_s_at // 227798_at	ENSG00000170365	ENSG00000170365	4086	SMAD1
MS_residual	-1	Cr2009.Down	affy_hg_u133_plus_2	219215_s_at	ENSG00000147804	--	--	--
MS_residual	-1	Cr2009.Down	affy_hg_u133_plus_2	235955_at // 235141_at	ENSG00000152939	ENSG00000152939	153562	MARVELD2
MS_residual	-1	Cr2009.Down	affy_hg_u133_plus_2	1553986_at // 235144_at	ENSG00000165105	ENSG00000165105	158158	RASEF
MS_residual	-1	Cr2009.Down	affy_hg_u133_plus_2	205347_s_at	ENSG00000158164	--	--	--
MS_residual	-1	Cr2009.Down	affy_hg_u133_plus_2	207178_s_at	ENSG00000111816	ENSG00000111816	2444	FRK
MS_residual	-1	Cr2009.Down	affy_hg_u133_plus_2	226482_s_at	ENSG00000215845	ENSG00000215845	100131187	TSTD1
MS_residual	-1	Cr2009.Down	affy_hg_u133_plus_2	239210_at	ENSG00000269887	--	--	--
MS_residual	-1	Cr2009.Down	affy_hg_u133_plus_2	212148_at	ENSG00000185630	ENSG00000185630	5087	PBX1
MS_residual	-1	Cr2009.Down	affy_hg_u133_plus_2	201510_at	ENSG00000163435 // ENSG00000249007	--	--	--
MS_residual	-1	Cr2009.Down	affy_hg_u133_plus_2	201242_s_at // 201243_s_at	ENSG00000143153	ENSG00000143153	481	ATP1B1
MS_residual	-1	Cr2009.Down	affy_hg_u133_plus_2	212686_at	ENSG00000111110	--	--	--
MS_residual	-1	Cr2009.Down	affy_hg_u133_plus_2	231807_at // 1554438_at	ENSG00000120549	ENSG00000120549	56243	KIAA1217
MS_residual	-1	Cr2009.Down	affy_hg_u133_plus_2	223000_s_at // 221664_s_at // 224097_s_at	ENSG00000270149 // ENSG00000158769	--	--	--
MS_residual	-1	Cr2009.Down	affy_hg_u133_plus_2	243179_at	ENSG00000272341	--	--	--
MS_residual	-1	Cr2009.Down	affy_hg_u133_plus_2	228058_at	ENSG00000162078	ENSG00000162078	124220	ZG16B
MS_residual	-1	Cr2009.Down	affy_hg_u133_plus_2	231319_x_at // 228429_x_at	ENSG00000088727	ENSG00000088727	64147	KIF9
MS_residual	-1	Cr2009.Down	affy_hg_u133_plus_2	200635_s_at	ENSG00000142949	ENSG00000142949	5792	PTPRF
MS_residual	-1	Cr2009.Down	affy_hg_u133_plus_2	210554_s_at	ENSG00000251102 // ENSG00000175029 // ENSG00000234383	--	--	--
MS_residual	-1	Cr2009.Down	affy_hg_u133_plus_2	219388_at	ENSG00000083307	ENSG00000083307	79977	GRHL2
MS_residual	-1	Cr2009.Down	affy_hg_u133_plus_2	201218_at // 210835_s_at	ENSG00000175029	ENSG00000175029	1488	CTBP2
MS_residual	-1	Cr2009.Down	affy_hg_u133_plus_2	201220_x_at	ENSG00000175029 // ENSG00000234383	--	--	--
MS_residual	-1	Cr2009.Down	affy_hg_u133_plus_2	203584_at	ENSG00000104412	ENSG00000104412	9694	TTC35
MS_residual	-1	Cr2009.Down	affy_hg_u133_plus_2	226727_at	ENSG00000277972 // ENSG00000275023	--	--	--
MS_residual	-1	Cr2009.Down	affy_hg_u133_plus_2	232083_at	ENSG00000089177	ENSG00000089177	55614	KIF16B
MS_residual	-1	Cr2009.Down	affy_hg_u133_plus_2	205190_at	ENSG00000120756	ENSG00000120756	5357	PLS1
MS_residual	-1	Cr2009.Down	affy_hg_u133_plus_2	210046_s_at	ENSG00000182054	ENSG00000182054	3418	IDH2
MS_residual	-1	Cr2009.Down	affy_hg_u133_plus_2	219000_s_at	ENSG00000136982	ENSG00000136982	79075	DSCC1
MS_residual	-1	Cr2009.Down	affy_hg_u133_plus_2	221088_s_at // 228494_at	ENSG00000158528	ENSG00000158528	55607	PPP1R9A
MS_residual	-1	Cr2009.Down	affy_hg_u133_plus_2	234970_at	ENSG00000165929	ENSG00000165929	123036	TC2N
MS_residual	-1	Cr2009.Down	affy_hg_u133_plus_2	201112_s_at	ENSG00000124207	ENSG00000124207	1434	CSE1L
MS_residual	-1	Cr2009.Down	affy_hg_u133_plus_2	213929_at // 214734_at	ENSG00000110723	ENSG00000110723	23086	EXPH5
MS_residual	-1	Cr2009.Down	affy_hg_u133_plus_2	230641_at	ENSG00000229970 // ENSG00000244239	--	--	--
MS_residual	-1	Cr2009.Down	affy_hg_u133_plus_2	219004_s_at	ENSG00000159055	ENSG00000159055	54069	MIS18A
MS_residual	-1	Cr2009.Down	affy_hg_u133_plus_2	226535_at	ENSG00000115221	ENSG00000115221	3694	ITGB6
MS_residual	-1	Cr2009.Down	affy_hg_u133_plus_2	40093_at	ENSG00000187244	ENSG00000187244	4059	BCAM
MS_residual	-1	Cr2009.Down	affy_hg_u133_plus_2	203216_s_at // 210480_s_at // 203215_s_at	ENSG00000196586	ENSG00000196586	4646	MYO6
MS_residual	-1	Cr2009.Down	affy_hg_u133_plus_2	229292_at	ENSG00000115109	ENSG00000115109	57669	EPB41L5
MS_residual	-1	Cr2009.Down	affy_hg_u133_plus_2	231022_at // 235937_at	ENSG00000197822	ENSG00000197822	100506658	OCLN
MS_residual	-1	Cr2009.Down	affy_hg_u133_plus_2	204641_at	ENSG00000117650	ENSG00000117650	4751	NEK2
MS_residual	-1	Cr2009.Down	affy_hg_u133_plus_2	227481_at	ENSG00000153721	ENSG00000153721	154043	CNKSR3
MS_residual	-1	Cr2009.Down	affy_hg_u133_plus_2	201927_s_at	ENSG00000144283	ENSG00000144283	8502	PKP4
MS_residual	-1	Cr2009.Down	affy_hg_u133_plus_2	230645_at	ENSG00000172159	ENSG00000172159	257019	FRMD3
MS_residual	-1	Cr2009.Down	affy_hg_u133_plus_2	32137_at	ENSG00000184916	ENSG00000184916	3714	JAG2
MS_residual	-1	Cr2009.Down	affy_hg_u133_plus_2	209478_at	ENSG00000169689	ENSG00000169689	201254	STRA13
MS_residual	-1	Cr2009.Down	affy_hg_u133_plus_2	1555058_a_at	ENSG00000123684	ENSG00000123684	9926	LPGAT1
MS_residual	-1	Cr2009.Down	affy_hg_u133_plus_2	204062_s_at	ENSG00000083290	ENSG00000083290	9706	ULK2
MS_residual	-1	Cr2009.Down	affy_hg_u133_plus_2	217809_at	ENSG00000136261	ENSG00000136261	28969	BZW2
MS_residual	-1	Cr2009.Down	affy_hg_u133_plus_2	226661_at	ENSG00000184661	ENSG00000184661	157313	CDCA2
MS_residual	-1	Cr2009.Down	affy_hg_u133_plus_2	218692_at	ENSG00000147642	ENSG00000147642	55638	SYBU
MS_residual	-1	Cr2009.Down	affy_hg_u133_plus_2	204927_at	ENSG00000099849	ENSG00000099849	8045	RASSF7
MS_residual	-1	Cr2009.Down	affy_hg_u133_plus_2	35148_at	ENSG00000105289	ENSG00000105289	27134	TJP3
MS_residual	-1	Cr2009.Down	affy_hg_u133_plus_2	228415_at	ENSG00000182287	ENSG00000182287	8905	AP1S2
MS_residual	-1	Cr2009.Down	affy_hg_u133_plus_2	226287_at	ENSG00000109881	ENSG00000109881	91057	CCDC34
MS_residual	-1	Cr2009.Down	affy_hg_u133_plus_2	222802_at	ENSG00000078401	ENSG00000078401	1906	EDN1
MS_residual	-1	Cr2009.Down	affy_hg_u133_plus_2	218342_s_at	ENSG00000099219	ENSG00000099219	79956	ERMP1
MS_residual	-1	Cr2009.Down	affy_hg_u133_plus_2	228851_s_at // 221487_s_at	ENSG00000143420 // ENSG00000259032	--	--	--
MS_residual	-1	Cr2009.Down	affy_hg_u133_plus_2	228852_at	ENSG00000143420	ENSG00000143420	2029	ENSA
MS_residual	-1	Cr2009.Down	affy_hg_u133_plus_2	1554452_a_at	ENSG00000135245	ENSG00000135245	29923	C7orf68
MS_residual	-1	Cr2009.Down	affy_hg_u133_plus_2	205376_at	ENSG00000109452	ENSG00000109452	8821	INPP4B
MS_residual	-1	Cr2009.Down	affy_hg_u133_plus_2	213235_at	ENSG00000103550	ENSG00000103550	400506	C16orf88
MS_residual	-1	Cr2009.Down	affy_hg_u133_plus_2	218756_s_at	ENSG00000278535	--	--	--
MS_residual	-1	Cr2009.Down	affy_hg_u133_plus_2	212115_at	ENSG00000206053	ENSG00000206053	90861	HN1L
MS_residual	-1	Cr2009.Down	affy_hg_u133_plus_2	228969_at // 209173_at	ENSG00000106541	ENSG00000106541	10551	AGR2
MS_residual	-1	Cr2009.Down	affy_hg_u133_plus_2	239657_x_at	ENSG00000204060	--	--	--
MS_residual	-1	Cr2009.Down	affy_hg_u133_plus_2	239155_at	ENSG00000154639	ENSG00000154639	1525	CXADR
MS_residual	-1	Cr2009.Down	affy_hg_u133_plus_2	229760_at	ENSG00000197415	ENSG00000197415	79674	VEPH1
MS_residual	-1	Cr2009.Down	affy_hg_u133_plus_2	227385_at	ENSG00000205808	ENSG00000205808	403313	PPAPDC2
MS_residual	-1	Cr2009.Down	affy_hg_u133_plus_2	232968_at	ENSG00000203780	ENSG00000203780	92565	FANK1
MS_residual	-1	Cr2009.Down	affy_hg_u133_plus_2	225367_at	ENSG00000169299	ENSG00000169299	55276	PGM2
MS_residual	-1	Cr2009.Down	affy_hg_u133_plus_2	204179_at	ENSG00000198125	ENSG00000198125	4151	MB
MS_residual	-1	Cr2009.Down	affy_hg_u133_plus_2	214501_s_at	ENSG00000113648	ENSG00000113648	9555	H2AFY
MS_residual	-1	Cr2009.Down	affy_hg_u133_plus_2	226697_at	ENSG00000197712	ENSG00000197712	92689	FAM114A1
MS_residual	-1	Cr2009.Down	affy_hg_u133_plus_2	236496_at	ENSG00000168350	ENSG00000168350	123099	DEGS2
MS_residual	-1	Cr2009.Down	affy_hg_u133_plus_2	236058_at	ENSG00000175707	ENSG00000175707	126695	C1orf172
MS_residual	-1	Cr2009.Down	affy_hg_u133_plus_2	222433_at	ENSG00000154380	ENSG00000154380	55740	ENAH
MS_residual	-1	Cr2009.Down	affy_hg_u133_plus_2	213308_at	ENSG00000162105	ENSG00000162105	22941	SHANK2
MS_residual	-1	Cr2009.Down	affy_hg_u133_plus_2	211812_s_at	ENSG00000169255	ENSG00000169255	8706	B3GALNT1
MS_residual	-1	Cr2009.Down	affy_hg_u133_plus_2	229638_at	ENSG00000177508	ENSG00000177508	79191	IRX3
MS_residual	-1	Cr2009.Down	affy_hg_u133_plus_2	204783_at	ENSG00000178053	ENSG00000178053	4291	MLF1
MS_residual	-1	Cr2009.Down	affy_hg_u133_plus_2	232067_at	ENSG00000146267	ENSG00000146267	84553	C6orf168
MS_residual	-1	Cr2009.Down	affy_hg_u133_plus_2	210715_s_at	ENSG00000167642	ENSG00000167642	10653	SPINT2
MS_residual	-1	Cr2009.Down	affy_hg_u133_plus_2	223232_s_at // 223233_s_at	ENSG00000143375	ENSG00000143375	57530	CGN
MS_residual	-1	Cr2009.Down	affy_hg_u133_plus_2	224970_at	ENSG00000162599	ENSG00000162599	4774	NFIA
MS_residual	-1	Cr2009.Down	affy_hg_u133_plus_2	238513_at	ENSG00000135378	ENSG00000135378	79056	PRRG4
MS_residual	-1	Cr2009.Down	affy_hg_u133_plus_2	203780_at	ENSG00000149573	ENSG00000149573	10205	MPZL2
MS_residual	-1	Cr2009.Down	affy_hg_u133_plus_2	226455_at	ENSG00000143578	ENSG00000143578	148327	CREB3L4
MS_residual	-1	Cr2009.Down	affy_hg_u133_plus_2	218186_at	ENSG00000132698	ENSG00000132698	57111	RAB25
MS_residual	-1	Cr2009.Down	affy_hg_u133_plus_2	239148_at	ENSG00000140832	ENSG00000140832	91862	MARVELD3
MS_residual	-1	Cr2009.Down	affy_hg_u133_plus_2	207828_s_at	ENSG00000117724	ENSG00000117724	1063	CENPF
MS_residual	-1	Cr2009.Down	affy_hg_u133_plus_2	222746_s_at	ENSG00000119411	ENSG00000119411	54836	BSPRY
MS_residual	-1	Cr2009.Down	affy_hg_u133_plus_2	1554408_a_at // 202338_at	ENSG00000167900	ENSG00000167900	7083	TK1
MS_residual	-1	Cr2009.Down	affy_hg_u133_plus_2	229000_at	ENSG00000175691	ENSG00000175691	58492	ZNF77
MS_residual	-1	Cr2009.Down	affy_hg_u133_plus_2	205392_s_at	ENSG00000275688 // ENSG00000276409	--	--	--
MS_residual	-1	Cr2009.Down	affy_hg_u133_plus_2	222075_s_at	ENSG00000143450	ENSG00000143450	51686	OAZ3
MS_residual	-1	Cr2009.Down	affy_hg_u133_plus_2	237439_at	ENSG00000154914	ENSG00000154914	124739	USP43
MS_residual	-1	Cr2009.Down	affy_hg_u133_plus_2	218806_s_at	ENSG00000134215	ENSG00000134215	10451	VAV3
MS_residual	-1	Cr2009.Down	affy_hg_u133_plus_2	202023_at	ENSG00000169242	ENSG00000169242	1942	EFNA1
MS_residual	-1	Cr2009.Down	affy_hg_u133_plus_2	238017_at	ENSG00000170786	ENSG00000170786	195814	SDR16C5
MS_residual	-1	Cr2009.Down	affy_hg_u133_plus_2	202454_s_at // 226213_at	ENSG00000065361	ENSG00000065361	2065	ERBB3
MS_residual	-1	Cr2009.Down	affy_hg_u133_plus_2	225548_at	ENSG00000138771	ENSG00000138771	57619	SHROOM3
MS_residual	-1	Cr2009.Down	affy_hg_u133_plus_2	205074_at	ENSG00000197375	ENSG00000197375	6584	SLC22A5
MS_residual	-1	Cr2009.Down	affy_hg_u133_plus_2	209603_at // 209604_s_at // 209602_s_at	ENSG00000107485	ENSG00000107485	2625	GATA3
MS_residual	-1	Cr2009.Down	affy_hg_u133_plus_2	228241_at	ENSG00000173467	ENSG00000173467	155465	AGR3
MS_residual	-1	Cr2009.Down	affy_hg_u133_plus_2	213122_at	ENSG00000180543	ENSG00000180543	85453	TSPYL5
MS_residual	-1	Cr2009.Down	affy_hg_u133_plus_2	219372_at	ENSG00000122970	ENSG00000122970	28981	IFT81
MS_residual	-1	Cr2009.Down	affy_hg_u133_plus_2	227196_at	ENSG00000131941	ENSG00000131941	85415	RHPN2
MS_residual	-1	Cr2009.Down	affy_hg_u133_plus_2	227019_at	ENSG00000239887	--	--	--
MS_residual	-1	Cr2009.Down	affy_hg_u133_plus_2	227371_at // 227372_s_at	ENSG00000006453	ENSG00000006453	55971	BAIAP2L1
MS_residual	-1	Cr2009.Down	affy_hg_u133_plus_2	227163_at	ENSG00000065621	ENSG00000065621	119391	GSTO2
MS_residual	-1	Cr2009.Down	affy_hg_u133_plus_2	220318_at	ENSG00000049283 // ENSG00000006282	--	--	--
MS_residual	-1	Cr2009.Down	affy_hg_u133_plus_2	232164_s_at // 232165_at // 208156_x_at	ENSG00000261150	--	--	--
MS_residual	-1	Cr2009.Down	affy_hg_u133_plus_2	201349_at	ENSG00000109062	ENSG00000109062	9368	SLC9A3R1
MS_residual	-1	Cr2009.Down	affy_hg_u133_plus_2	242354_at	ENSG00000261183	--	--	--
MS_residual	-1	Cr2009.Down	affy_hg_u133_plus_2	217894_at	ENSG00000136636	ENSG00000136636	51133	KCTD3
MS_residual	-1	Cr2009.Down	affy_hg_u133_plus_2	221521_s_at	ENSG00000131153	ENSG00000131153	51659	GINS2
MS_residual	-1	Cr2009.Down	affy_hg_u133_plus_2	222829_s_at	ENSG00000016402	ENSG00000016402	53832	IL20RA
MS_residual	-1	Cr2009.Down	affy_hg_u133_plus_2	235515_at	ENSG00000181392	ENSG00000181392	163183	C19orf46
MS_residual	-1	Cr2009.Down	affy_hg_u133_plus_2	203517_at	ENSG00000128654	ENSG00000128654	10651	MTX2
MS_residual	-1	Cr2009.Down	affy_hg_u133_plus_2	222830_at	ENSG00000134317	ENSG00000134317	29841	GRHL1
MS_residual	-1	Cr2009.Down	affy_hg_u133_plus_2	225846_at // 219121_s_at	ENSG00000104413	ENSG00000104413	54845	ESRP1
MS_residual	-1	Cr2009.Down	affy_hg_u133_plus_2	243618_s_at	ENSG00000151612	ENSG00000151612	152485	ZNF827
MS_residual	-1	Cr2009.Down	affy_hg_u133_plus_2	203016_s_at	ENSG00000117155	ENSG00000117155	117178	SSX2IP
MS_residual	-1	Cr2009.Down	affy_hg_u133_plus_2	205980_s_at // 37117_at	ENSG00000241484 // ENSG00000248405	--	--	--
MS_residual	-1	Cr2009.Down	affy_hg_u133_plus_2	225060_at	ENSG00000120256	ENSG00000120256	84918	LRP11
MS_residual	-1	Cr2009.Down	affy_hg_u133_plus_2	212445_s_at	ENSG00000049759	ENSG00000049759	23327	NEDD4L
MS_residual	-1	Cr2009.Down	affy_hg_u133_plus_2	221223_x_at	ENSG00000114737	ENSG00000114737	1154	CISH
MS_residual	-1	Cr2009.Down	affy_hg_u133_plus_2	202018_s_at	ENSG00000012223	ENSG00000012223	4057	LTF
MS_residual	-1	Cr2009.Down	affy_hg_u133_plus_2	218174_s_at	ENSG00000133678	ENSG00000133678	80195	C10orf57
MS_residual	-1	Cr2009.Down	affy_hg_u133_plus_2	226248_s_at	ENSG00000116299	ENSG00000116299	57535	KIAA1324
MS_residual	-1	Cr2009.Down	affy_hg_u133_plus_2	207802_at	ENSG00000096006	ENSG00000096006	10321	CRISP3
MS_residual	-1	Cr2009.Down	affy_hg_u133_plus_2	212637_s_at	ENSG00000123124	ENSG00000123124	11059	WWP1
MS_residual	-1	Cr2009.Down	affy_hg_u133_plus_2	230061_at	ENSG00000163762	ENSG00000163762	116441	TM4SF18
MS_residual	-1	Cr2009.Down	affy_hg_u133_plus_2	218209_s_at	ENSG00000141425	ENSG00000141425	55197	RPRD1A
MS_residual	-1	Cr2009.Down	affy_hg_u133_plus_2	209631_s_at	ENSG00000170775	ENSG00000170775	2861	GPR37
MS_residual	-1	Cr2009.Down	affy_hg_u133_plus_2	224650_at	ENSG00000147676	--	--	--
MS_residual	-1	Cr2009.Down	affy_hg_u133_plus_2	225981_at	ENSG00000167861	ENSG00000167861	283987	C17orf28
MS_residual	-1	Cr2009.Down	affy_hg_u133_plus_2	215380_s_at	ENSG00000006625	ENSG00000006625	79017	GGCT
MS_residual	-1	Cr2009.Down	affy_hg_u133_plus_2	226803_at	ENSG00000164695	ENSG00000164695	92421	CHMP4C
MS_residual	-1	Cr2009.Down	affy_hg_u133_plus_2	201754_at	ENSG00000164919	ENSG00000164919	1345	COX6C
MS_residual	-1	Cr2009.Down	affy_hg_u133_plus_2	1554572_a_at	ENSG00000152455	ENSG00000152455	79723	SUV39H2
MS_residual	-1	Cr2009.Down	affy_hg_u133_plus_2	201764_at	ENSG00000134291	ENSG00000134291	79022	TMEM106C
MS_residual	-1	Cr2009.Down	affy_hg_u133_plus_2	207986_x_at // 209164_s_at	ENSG00000008283	ENSG00000008283	1534	CYB561
MS_residual	-1	Cr2009.Down	affy_hg_u133_plus_2	214098_at	ENSG00000069712	--	--	--
MS_residual	-1	Cr2009.Down	affy_hg_u133_plus_2	220177_s_at // 223949_at	ENSG00000160183	ENSG00000160183	64699	TMPRSS3
[truncated: 3,618 more rows]

## Sheet: TableS4_deNovoGenes
## Supplementary Table S4. Probes associated with BV metastatic spread.
## Bone+Visceral vs NoMets, GWDb ERpos (case-control paired, ESR1/IHC consistent)
	probeID	p	p.adj	meanFC	Symbol	sigName_overlap
BV ERpos	7160048	4.86282e-06	0.073349	0.257757	CENPO
BV ERpos	2510639	5.40026e-06	0.073349	0.232314	CENPE	Ignatiadis2012_autoSplit.GGI.Up/Ignatiadis2012_autoSplit.PTEN.Up
BV ERpos	610397	1.99283e-05	0.175443	0.101692	AIM1L	Lu2010_SCP2hypoxia.Up
BV ERpos	4180133	3.57021e-05	0.175443	0.436938	SKA3
BV ERpos	6250451	3.57021e-05	0.175443	0.572754	CENPI
BV ERpos	6660131	3.87505e-05	0.175443	0.258086	TSPAN13	Ignatiadis2012_autoSplit.AKTmTOR.Up
BV ERpos	4670670	5.14803e-05	0.179453	0.489771	CDC25A	Ignatiadis2012_autoSplit.GGI.Up/Cr2009.Down/HIS.Up
BV ERpos	1050204	7.37291e-05	0.179453	0.487971	CASC5
BV ERpos	4890224	7.87343e-05	0.179453	0.198681	SLC35A2
BV ERpos	1510278	7.97743e-05	0.179453	0.459689	hNp95
BV ERpos	360324	8.62927e-05	0.179453	-0.0333729	PHF7
BV ERpos	4150754	9.33189e-05	0.179453	-0.317084	RSPO1
BV ERpos	3990619	9.33189e-05	0.179453	0.669047	TOP2A	Ignatiadis2012_autoSplit.CIN70.Up/Cr2009.Down/hNMSC.Up
BV ERpos	1070411	9.57763e-05	0.179453	0.371079	SPC25
BV ERpos	1400735	0.000109003	0.179453	0.1088	SMC4
BV ERpos	4860437	0.000111848	0.179453	0.122284	ZMYND19
BV ERpos	6130390	0.000119262	0.179453	0.201562	RPL26L1
BV ERpos	7570044	0.000123949	0.179453	0.165019	VANGL1
BV ERpos	7650209	0.00013045	0.179453	0.116819	BMF	Bcell.PalmerSig
BV ERpos	4560019	0.00013212	0.179453	0.136357	MBOAT2	Ignatiadis2012_autoSplit.AKTmTOR.Up/Ignatiadis2012_autoSplit.RAS.Up/Bild2006_RAS.centroidList
BV ERpos	4260243	0.00015193	0.196532	0.111528	MFHAS1	Desmedt2008_autoSplit.ESR1.Down/Bild2006_E2F3.centroidList

## Sheet: TableS5_BVrisk
	Supplementary Table S5. Statistics and estimates for putative BV gene module
		BV SERIES
		Cases	Controls	Wilcoxon paired	Mann-Whitney U	Conditional LogReg		Logistic Regression
		Median (IQR)	Median (IQR)	p	p	OR (95% CI)	p	OR (95% CI)	p
	GWDb
	BV21 gene module
	BV21 score	0.19 (-0.14, 0.48)	-0.23 (-0.74, 0.18)	<1e-4	0.0004	5.4 (1.9-15)	0.002	6.0 (3.1-12.2)	<1e-4
	ER status	n	n
	ER-negative	25	65			Ref.		Ref.
	ER-positive	15	65			0.83 (0.25-2.7)	0.8	0.64 (0.30-1.3)	0.2
	GWDa
	BV21 gene module
	BV21 score	0.19 (-0.1,0.31)	-0.03 (-0.16,0.15)	--	0.3	--	--	1.9 (0.38-9.7)	0.4
	ER status	n	n
	ER-negative	6	14					Ref.
	ER-positive	5	11			--	--	1.1 (0.25-4.5)	0.9
