# Supplementary material for: Gene expression modules in primary breast cancers as risk factors for organotropic patterns of first metastatic spread: a case control study
Source: Breast Cancer Res. 2017 Oct 13;19:113. doi: 10.1186/s13058-017-0881-y (PMC5640935; doi:10.1186/s13058-017-0881-y)
Supplement: Supplementary file 4 — Estimated ORs for molecular subtype representation based on conditional logistic regression. (PDF 1 mb) [file 13058_2017_881_MOESM4_ESM.pdf]

### Table 3

[illegible]

**Footnotes:** Conditional logistic regression.  
Epi::logistic, Case\_Control ~ x + strata(Random\_Selection)  
Note: Counts of pairs (not missing) and informative entries in the conditional logistic model are shown for information.
