# Supplementary material for: Gene expression modules in primary breast cancers as risk factors for organotropic patterns of first metastatic spread: a case control study
Source: Breast Cancer Res. 2017 Oct 13;19:113. doi: 10.1186/s13058-017-0881-y (PMC5640935; doi:10.1186/s13058-017-0881-y)
Supplement: Supplementary file 6 — Distribution of gene module scores for cases and controls in each case-control series, and estimated ORs using conditional logistic and logistic regression models. (XLSX 47 kb) [file 13058_2017_881_MOESM6_ESM.xlsx]

## Sheet: Description_TableS3
	Supplementary Table S3.
	Distribution of gene module scores for cases and controls in each case-control series, and estimated ORs using conditional logistic and logistic regression models (GWDb).
	Forest plots of log(OR) are shown for illustrative gene modules in Fig. 2.
	Gene module definitions are listed in Additional file 3: Table S2.
	S3a-j: Each sheet shows a case-control series (V, BV, B, any case type) and ER subset (ERany/ERpos/ERneg; defined by IHC and ESR1) as follows:
	a-b: (a) Visceral-only case-control series, and (b) restricted to ER-positive;
	c-e: (c) Bone and visceral, and (d) restricted to ER-positive, (e) ER-negative;
	f-g: (f) Bone-only, and (g) restricted to ER-positive;
	h-j: (h) Any case type, and (i) restricted to ER-positive, (j) ER-negative.
	Note: “ER-positive” analyses are restricted to case-control pairs in which both samples are ER-positive (by IHC and ESR1), and similarly for “ER-negative”.
	Note: Due to missing data, the ER-negative subset is not shown for visceral-only and bone-only case-control series (Additional file 3: Table S1 shows an overview of available samples in GWDb).
	Summaries and tests reported in Tables S3A-J:
	Median and interquartile range of Cases and of Controls
	Wilcoxon paired
	Mann-Whitney U (unpaired)
	Conditional logistic regression
	Logistic regression
	"p (adj)" reports FDR (BH)-correction for multiple testing. The correction was applied within each test, across the panel of gene modules.

## Sheet: S3a_V_ERany
	Any ER status	V SERIES
		Cases	Controls	Wilcoxon paired		Mann-Whitney U		Conditional LogReg	Logistic Regression
	Gene Modules	Median (IQR)	Median (IQR)	p	p (adj)	p	p (adj)	OR (95% CI)	OR (95% CI)	p	p (adj)
Proliferation signatures (see Results section)	AURKA	0.25 (-0.23-0.53)	-0.33 (-0.71-0.33)	0.01	0.05	8e-05	7e-04	2.4 (1.2-4.8)	2.8 (1.7-4.7)	9e-05	0.001	Proliferation signatures (see Results section)
	CIN70	0.13 (-0.27-0.52)	-0.34 (-0.82-0.22)	0.01	0.05	4e-05	6e-04	2.3 (1.2-4.4)	2.9 (1.8-4.9)	3e-05	8e-04
	PTEN	0.15 (-0.23-0.48)	-0.26 (-0.76-0.28)	0.01	0.05	3e-04	0.001	2.5 (1.2-5.1)	2.6 (1.6-4.4)	3e-04	0.002
	GENE70	0.19 (-0.19-0.58)	-0.17 (-0.62-0.22)	0.03	0.1	2e-04	0.001	2.1 (1-4)	2.7 (1.6-4.6)	3e-04	0.002
	IGF1	0.17 (-0.28-0.66)	-0.13 (-0.65-0.36)	0.08	0.2	0.002	0.006	1.7 (0.9-3.2)	2.1 (1.3-3.5)	0.003	0.01
	E2F3	0.15 (-0.23-0.58)	-0.1 (-0.4-0.26)	0.003	0.04	0.001	0.006	2.7 (1.2-6.3)	2.2 (1.4-3.8)	0.002	0.01
	AKTmTOR	0.19 (-0.14-0.48)	-0.29 (-0.82-0.26)	0.001	0.04	2e-05	5e-04	3.3 (1.5-7.4)	2.2 (1.4-3.6)	0.001	0.007
	Mid_burden	0.01 (-0.37-0.55)	-0.02 (-0.3-0.31)	1	1	0.4	0.6	1 (0.5-2.2)	1.1 (0.72-1.8)	0.6	0.8
	Low_burden	0.05 (-0.3-0.6)	-0.03 (-0.27-0.29)	1	1	0.2	0.3	1.1 (0.58-2)	1.4 (0.87-2.3)	0.2	0.3
	MaSC	-0.01 (-0.47-0.34)	0 (-0.43-0.33)	0.8	1	0.8	0.9	1 (0.52-1.9)	0.93 (0.58-1.5)	0.7	0.9
	HIS	0.05 (-0.26-0.42)	-0.12 (-0.52-0.41)	0.09	0.2	0.07	0.2	1.7 (0.82-3.5)	1.4 (0.88-2.2)	0.2	0.3
	hNMSC	0.06 (-0.36-0.34)	-0.04 (-0.43-0.34)	0.5	0.9	0.4	0.6	1.3 (0.62-2.6)	1.3 (0.79-2.2)	0.3	0.5
	Tcell	0.03 (-0.38-0.49)	-0.02 (-0.45-0.45)	0.7	1	0.8	0.9	1.3 (0.62-2.7)	1.1 (0.69-1.8)	0.7	0.8
	Stroma	-0.06 (-0.55-0.36)	0.08 (-0.31-0.46)	0.07	0.2	0.1	0.2	0.53 (0.27-1)	0.64 (0.4-1)	0.06	0.2
	Immune1	0.02 (-0.38-0.42)	0 (-0.34-0.4)	0.9	1	0.9	0.9	1.2 (0.6-2.5)	1.1 (0.69-1.8)	0.7	0.8
	Immune2	0.09 (-0.35-0.59)	-0.06 (-0.46-0.46)	0.3	0.5	0.2	0.3	1.5 (0.69-3.2)	1.4 (0.87-2.3)	0.2	0.3
	Brain_infiltSig	-0.06 (-0.5-0.26)	0.09 (-0.37-0.46)	0.04	0.1	0.2	0.4	0.55 (0.29-1)	0.85 (0.54-1.3)	0.5	0.7
	Brain_metsSig	0.06 (-0.3-0.53)	-0.03 (-0.37-0.4)	0.8	1	0.2	0.3	1.2 (0.64-2.2)	1.5 (0.92-2.5)	0.1	0.3
	MS_residual	-0.05 (-0.58-0.33)	0.14 (-0.32-0.57)	0.01	0.05	0.01	0.03	0.51 (0.27-0.95)	0.62 (0.39-0.96)	0.04	0.1
	TBRS	0 (-0.55-0.49)	0.01 (-0.44-0.36)	0.7	1	0.7	0.9	1.1 (0.57-2)	1.1 (0.7-1.6)	0.8	0.9
	SigA_TGFb	-0.07 (-0.6-0.2)	0.13 (-0.32-0.49)	0.03	0.1	0.01	0.04	0.54 (0.27-1.1)	0.6 (0.37-0.93)	0.03	0.09
	SigB_TGFb	-0.04 (-0.55-0.29)	0.03 (-0.32-0.28)	0.8	1	0.7	0.9	1.1 (0.6-2)	0.88 (0.53-1.4)	0.6	0.8
	Hypoxia_boneMets	-0.02 (-0.41-0.52)	0.01 (-0.24-0.39)	0.6	1	0.8	0.9	1 (0.58-1.8)	0.99 (0.67-1.5)	1	1
	Hypoxia_lungMets	-0.01 (-0.42-0.36)	0.06 (-0.38-0.38)	0.8	1	0.8	0.9	1.1 (0.56-2.1)	0.99 (0.63-1.6)	1	1
	Bone_metsSig	-0.02 (-0.39-0.35)	0.02 (-0.31-0.29)	1	1	1	1	1.2 (0.59-2.3)	1.1 (0.66-1.7)	0.8	0.9
	Liver_metsSig	0.04 (-0.35-0.43)	-0.04 (-0.4-0.39)	0.2	0.4	0.3	0.5	1.7 (0.81-3.6)	1.4 (0.86-2.4)	0.2	0.3

## Sheet: S3b_V_ERpos
	ER-positive	V SERIES
		Cases	Controls	Wilcoxon paired		Mann-Whitney U		Conditional LogReg	Logistic Regression
	Gene Modules	Median (IQR)	Median (IQR)	p	p (adj)	p	p (adj)	OR (95% CI)	OR (95% CI)	p	p (adj)
Proliferation signatures (see Results section)	AURKA	0.37 (-0.02-0.83)	-0.36 (-0.79-0.28)	0.002	0.006	7e-04	0.003	9 (1.4-57)	7.3 (2.2-33)	0.003	0.02	Proliferation signatures (see Results section)
	CIN70.Up	0.28 (-0.03-0.77)	-0.55 (-0.87-0.11)	4e-04	0.002	5e-04	0.003	14 (1.3-140)	8.6 (2.6-42)	0.002	0.02
	PTEN	0.39 (-0.14-0.68)	-0.52 (-0.85-0.01)	2e-04	0.001	1e-04	0.001	49 (1.4-1700)	12 (3.2-69)	0.001	0.02
	GENE70	0.22 (-0.04-0.7)	-0.37 (-0.66-0.02)	0.006	0.02	0.003	0.009	9 (1.1-74)	5.8 (1.8-25)	0.007	0.03
	IGF1	0.15 (-0.33-0.52)	-0.33 (-0.7-0.1)	0.05	0.1	0.02	0.04	3 (0.91-10)	3.3 (1.1-12)	0.05	0.1
	E2F3	0.35 (0.06-0.67)	-0.39 (-0.6--0.02)	8e-05	7e-04	6e-05	8e-04	39 (1.8-870)	13 (3-91)	0.003	0.02
	AKTmTOR.Up	0.25 (-0.05-0.55)	-0.41 (-0.89-0.08)	4e-04	0.002	7e-04	0.003	16 (1.6-170)	7.3 (2.2-35)	0.004	0.02
	Mid_burden	-0.23 (-0.57-0.18)	0.01 (-0.39-0.38)	0.3	0.4	0.3	0.4	0.61 (0.22-1.7)	0.7 (0.28-1.6)	0.4	0.5
	Low_burden	-0.28 (-0.52-0.57)	0.17 (-0.19-0.47)	0.4	0.5	0.7	0.7	0.58 (0.19-1.8)	0.73 (0.3-1.7)	0.5	0.5
	MaSC	-0.15 (-0.37-0.15)	0.08 (-0.31-0.59)	0.2	0.3	0.2	0.3	0.62 (0.24-1.6)	0.59 (0.2-1.5)	0.3	0.4
	HIS	0.18 (-0.01-0.76)	-0.15 (-0.77-0.03)	5e-05	7e-04	0.003	0.009	1100 (2.4-480000)	5.1 (1.6-22)	0.01	0.04
	hNMSC	0.19 (-0.19-0.36)	-0.17 (-0.56-0.37)	0.2	0.3	0.3	0.4	1.9 (0.76-4.9)	2.1 (0.83-5.9)	0.1	0.3
	Tcell	0 (-0.39-0.13)	0.04 (-0.2-0.54)	0.3	0.4	0.4	0.5	0.54 (0.16-1.8)	0.59 (0.18-1.7)	0.3	0.5
	Stroma	-0.38 (-0.66-0.06)	0.09 (-0.03-0.51)	0.02	0.04	0.004	0.01	0.33 (0.12-0.96)	0.19 (0.042-0.61)	0.01	0.04
	Immune1	-0.15 (-0.43-0.43)	0.11 (-0.25-0.31)	0.4	0.4	0.4	0.5	0.87 (0.29-2.6)	0.9 (0.33-2.4)	0.8	0.9
	Immune2	0.06 (-0.26-0.25)	-0.18 (-0.61-0.3)	0.6	0.7	0.6	0.6	1.2 (0.49-3.2)	1.3 (0.47-3.5)	0.6	0.7
	Brain_infiltSig	-0.13 (-0.44-0.07)	0.18 (-0.05-0.64)	0.01	0.03	0.01	0.03	0.2 (0.042-0.97)	0.23 (0.052-0.74)	0.03	0.06
	Brain_metsSig	-0.03 (-0.4-0.49)	0.08 (-0.42-0.54)	0.9	0.9	0.9	0.9	1 (0.37-2.9)	1 (0.41-2.6)	0.9	0.9
	MS_residual	-0.31 (-0.48--0.1)	0.57 (0.05-1.04)	3e-05	7e-04	1e-06	3e-05	0.024 (0.00082-0.69)	0.048 (0.0047-0.23)	0.002	0.02
	TBRS	-0.2 (-0.52-0.22)	0.32 (-0.03-0.8)	0.02	0.04	0.007	0.02	0.65 (0.31-1.4)	0.57 (0.21-1.2)	0.2	0.3
	SigA_TGFb	-0.33 (-0.63-0.16)	0.36 (-0.03-0.88)	0.006	0.02	0.001	0.005	0.39 (0.14-1)	0.27 (0.078-0.75)	0.02	0.06
	SigB_TGFb	0.16 (-0.41-0.64)	-0.09 (-0.62-0.19)	0.3	0.4	0.2	0.3	1.6 (0.58-4.2)	1.5 (0.61-3.7)	0.4	0.5
	Hypoxia_boneMets	0.04 (-0.27-0.61)	-0.06 (-0.47-0.16)	0.4	0.4	0.2	0.3	1.1 (0.56-2.1)	1.1 (0.52-2.5)	0.8	0.9
	Hypoxia_lungMets	-0.02 (-0.36-0.88)	0.06 (-0.26-0.44)	0.7	0.7	0.7	0.8	1.7 (0.62-4.4)	1.5 (0.66-3.9)	0.3	0.5
	Bone_metsSig	0.06 (-0.18-0.62)	-0.03 (-0.24-0.21)	0.3	0.4	0.5	0.6	1.9 (0.68-5.4)	2.1 (0.75-7.1)	0.2	0.3
	Liver_metsSig	0.2 (-0.18-0.54)	-0.11 (-0.62-0.15)	0.06	0.1	0.05	0.09	2.4 (0.84-7)	3.1 (1.1-11)	0.06	0.1

## Sheet: S3c_BV_ERany
	Any ER status	BV SERIES
		Cases	Controls	Wilcoxon paired		Mann-Whitney U		Conditional LogReg	Logistic Regression
	Gene Modules	Median (IQR)	Median (IQR)	p	p (adj)	p	p (adj)	OR (95% CI)	OR (95% CI)	p	p (adj)
Proliferation signatures (see Results section)	AURKA	0.19 (-0.23-0.54)	-0.25 (-0.71-0.26)	0.02	0.2	6e-05	5e-04	2.2 (1.1-4.5)	2.8 (1.7-4.7)	6e-05	8e-04	Proliferation signatures (see Results section)
	CIN70.Up	0.15 (-0.23-0.49)	-0.34 (-0.72-0.33)	0.008	0.2	3e-05	5e-04	2.6 (1.3-5.4)	2.9 (1.8-4.9)	4e-05	8e-04
	PTEN	0.14 (-0.21-0.55)	-0.22 (-0.59-0.37)	0.02	0.2	0.001	0.005	2.3 (1.1-4.8)	2 (1.3-3.3)	0.004	0.02
	GENE70	0.15 (-0.27-0.49)	-0.28 (-0.59-0.26)	0.05	0.3	2e-04	0.001	2.2 (1-4.9)	2.3 (1.4-3.8)	0.001	0.007
	IGF1	0.12 (-0.21-0.58)	-0.28 (-0.64-0.32)	0.2	0.6	6e-05	5e-04	1.8 (0.86-3.7)	2.5 (1.6-4.3)	2e-04	0.002
	E2F3	0.16 (-0.22-0.54)	-0.1 (-0.47-0.22)	0.05	0.3	0.001	0.005	2 (0.93-4.2)	1.7 (1.1-2.8)	0.02	0.07
	AKTmTOR.Up	0.14 (-0.35-0.47)	-0.15 (-0.52-0.33)	0.3	0.6	0.03	0.1	1.4 (0.69-2.9)	1.2 (0.84-1.8)	0.3	0.4
	Mid_burden	0.01 (-0.36-0.36)	-0.04 (-0.41-0.32)	0.6	0.7	0.5	0.5	1.3 (0.69-2.5)	1.2 (0.76-1.9)	0.5	0.5
	Low_burden	0.04 (-0.31-0.39)	-0.02 (-0.28-0.15)	0.2	0.6	0.1	0.2	1.7 (0.76-3.7)	1.5 (0.87-2.5)	0.2	0.3
	MaSC	-0.05 (-0.47-0.29)	0.07 (-0.34-0.5)	0.3	0.6	0.1	0.2	0.71 (0.36-1.4)	0.65 (0.4-1)	0.06	0.2
	HIS	0.12 (-0.39-0.42)	-0.14 (-0.55-0.19)	0.1	0.5	0.08	0.2	1.7 (0.83-3.4)	1.2 (0.81-1.7)	0.4	0.5
	hNMSC	0.15 (-0.31-0.66)	-0.11 (-0.61-0.35)	0.1	0.5	0.006	0.02	1.8 (0.92-3.4)	2 (1.3-3.2)	0.004	0.02
	Tcell	-0.11 (-0.36-0.33)	0.14 (-0.33-0.5)	0.4	0.6	0.09	0.2	0.78 (0.42-1.4)	0.66 (0.41-1)	0.07	0.2
	Stroma	-0.06 (-0.43-0.22)	0.1 (-0.25-0.35)	0.4	0.6	0.08	0.2	0.77 (0.42-1.4)	0.66 (0.4-1.1)	0.1	0.2
	Immune1	-0.09 (-0.47-0.43)	0.06 (-0.25-0.51)	0.2	0.6	0.04	0.1	0.8 (0.47-1.4)	0.67 (0.42-1)	0.08	0.2
	Immune2	-0.04 (-0.41-0.36)	0.13 (-0.45-0.49)	0.4	0.6	0.3	0.4	0.81 (0.45-1.4)	0.78 (0.48-1.3)	0.3	0.4
	Brain_infiltSig	-0.04 (-0.42-0.32)	0.04 (-0.27-0.25)	0.9	0.9	0.7	0.8	1 (0.61-1.8)	0.97 (0.61-1.5)	0.9	0.9
	Brain_metsSig	0.02 (-0.26-0.5)	-0.02 (-0.29-0.23)	0.6	0.6	0.2	0.3	1.3 (0.58-2.7)	1.4 (0.88-2.3)	0.2	0.3
	MS_residual	-0.02 (-0.4-0.4)	0.02 (-0.32-0.68)	0.4	0.6	0.1	0.2	0.73 (0.36-1.5)	0.76 (0.5-1.2)	0.2	0.3
	TBRS	0.02 (-0.39-0.34)	-0.02 (-0.31-0.33)	0.4	0.6	0.8	0.8	0.77 (0.4-1.5)	0.84 (0.51-1.3)	0.5	0.5
	SigA_TGFb	-0.02 (-0.48-0.26)	0.1 (-0.27-0.42)	0.3	0.6	0.06	0.2	0.73 (0.39-1.4)	0.63 (0.38-1)	0.06	0.2
	SigB_TGFb	0 (-0.44-0.19)	0.02 (-0.27-0.21)	0.5	0.6	0.4	0.5	0.7 (0.33-1.5)	0.81 (0.5-1.3)	0.4	0.5
	Hypoxia_boneMets	-0.1 (-0.38-0.42)	0.06 (-0.28-0.3)	0.9	0.9	0.6	0.7	1 (0.54-1.9)	1 (0.68-1.6)	0.9	0.9
	Hypoxia_lungMets	-0.01 (-0.51-0.32)	0.02 (-0.35-0.39)	0.4	0.6	0.4	0.5	0.73 (0.39-1.4)	0.77 (0.49-1.2)	0.2	0.3
	Bone_metsSig	0.04 (-0.3-0.48)	-0.04 (-0.28-0.22)	0.4	0.6	0.1	0.2	1.5 (0.67-3.3)	1.6 (0.97-2.7)	0.07	0.2
	Liver_metsSig	0.15 (-0.23-0.61)	-0.05 (-0.36-0.43)	0.3	0.6	0.09	0.2	1.4 (0.78-2.5)	1.5 (0.98-2.5)	0.07	0.2

## Sheet: S3d_BV_ERpos
	ER-positive	BV SERIES
		Cases	Controls	Wilcoxon paired		Mann-Whitney U		Conditional LogReg	Logistic Regression
	Gene Modules	Median (IQR)	Median (IQR)	p	p (adj)	p	p (adj)	OR (95% CI)	OR (95% CI)	p	p (adj)
	AURKA	0.18 (-0.18-0.65)	-0.31 (-0.6-0.3)	0.04	0.2	0.03	0.3	2.4 (1-5.9)	2.7 (1.1-7)	0.03	0.3
	CIN70.Up	0.18 (-0.27-0.56)	-0.16 (-0.43-0.29)	0.04	0.2	0.05	0.3	2.6 (0.99-7)	2.9 (1.1-8.6)	0.04	0.3
	PTEN	0.12 (-0.08-0.66)	-0.24 (-0.5-0.33)	0.02	0.2	0.01	0.3	2.7 (1-7)	3.1 (1.3-9)	0.02	0.3
	GENE70	0.23 (-0.42-0.64)	-0.26 (-0.56-0.38)	0.1	0.4	0.1	0.5	1.9 (0.82-4.6)	2 (0.88-5)	0.1	0.4
	IGF1	0.24 (-0.38-0.62)	-0.07 (-0.65-0.38)	0.2	0.7	0.2	0.7	1.8 (0.75-4.2)	1.8 (0.77-4.3)	0.2	0.6
	E2F3	0.04 (-0.17-0.59)	-0.1 (-0.51-0.28)	0.02	0.2	0.08	0.3	5.3 (1.1-26)	2.5 (1-7)	0.06	0.4
	AKTmTOR.Up	0.24 (-0.26-0.69)	-0.13 (-0.63-0.14)	0.02	0.2	0.06	0.3	2.5 (0.87-7.2)	2 (0.89-4.7)	0.1	0.4
	Mid_burden	-0.21 (-0.77-0.55)	0.12 (-0.28-0.57)	0.4	0.9	0.5	0.9	0.76 (0.34-1.7)	0.78 (0.36-1.6)	0.5	0.8
	Low_burden	-0.02 (-0.61-0.37)	0.02 (-0.27-0.22)	0.8	0.9	0.8	0.9	0.96 (0.43-2.2)	0.95 (0.39-2.3)	0.9	0.9
	MaSC	0 (-0.58-0.4)	-0.04 (-0.41-0.5)	0.7	0.9	0.7	0.9	0.8 (0.34-1.9)	0.84 (0.39-1.8)	0.6	0.8
	HIS	0.15 (-0.18-0.54)	-0.23 (-0.43-0.24)	0.05	0.2	0.06	0.3	2.2 (0.82-6.1)	2.1 (0.88-5.2)	0.1	0.4
	hNMSC	0.02 (-0.21-0.62)	0 (-0.53-0.36)	0.5	0.9	0.3	0.8	1.6 (0.65-3.7)	1.5 (0.67-3.4)	0.3	0.8
	Tcell	-0.08 (-0.3-0.27)	0.09 (-0.33-0.26)	0.9	0.9	0.7	0.9	1 (0.43-2.5)	1 (0.41-2.6)	1	1
	Stroma	-0.16 (-0.39-0.15)	0.05 (-0.27-0.37)	0.6	0.9	0.3	0.8	0.68 (0.29-1.6)	0.68 (0.27-1.6)	0.4	0.8
	Immune1	-0.18 (-0.53-0.8)	0.06 (-0.26-0.6)	0.7	0.9	0.5	0.9	0.84 (0.42-1.7)	0.83 (0.39-1.7)	0.6	0.8
	Immune2	-0.1 (-0.39-0.48)	0.11 (-0.47-0.46)	1	1	1	1	1.1 (0.47-2.7)	1.1 (0.49-2.5)	0.8	0.9
	Brain_infiltSig	-0.1 (-0.57-0.39)	0.04 (-0.37-0.23)	0.8	0.9	0.7	0.9	0.77 (0.32-1.8)	0.77 (0.31-1.8)	0.6	0.8
	Brain_metsSig	-0.01 (-0.51-0.61)	0.06 (-0.41-0.49)	0.8	0.9	0.9	1	0.92 (0.41-2.1)	0.93 (0.41-2.1)	0.9	0.9
	MS_residual	-0.21 (-0.57-0.49)	0.03 (-0.11-0.5)	0.5	0.9	0.4	0.8	0.72 (0.32-1.6)	0.73 (0.33-1.6)	0.4	0.8
	TBRS	-0.08 (-0.4-0.54)	0.02 (-0.27-0.48)	0.6	0.9	0.8	0.9	0.81 (0.34-1.9)	0.83 (0.36-1.9)	0.7	0.8
	SigA_TGFb	-0.05 (-0.47-0.17)	0.06 (-0.29-0.36)	0.5	0.9	0.3	0.8	0.75 (0.32-1.7)	0.77 (0.33-1.7)	0.5	0.8
	SigB_TGFb	0.02 (-0.41-0.45)	-0.01 (-0.36-0.29)	0.8	0.9	0.8	0.9	1.2 (0.5-2.7)	1.2 (0.48-3)	0.7	0.8
	Hypoxia_boneMets	-0.09 (-0.34-0.41)	0.07 (-0.45-0.36)	0.7	0.9	1	1	1.2 (0.53-2.8)	1.2 (0.52-3)	0.6	0.8
	Hypoxia_lungMets	0 (-0.52-0.23)	-0.08 (-0.61-0.39)	0.6	0.9	0.8	0.9	0.73 (0.27-2)	0.8 (0.33-1.9)	0.6	0.8
	Bone_metsSig	-0.03 (-0.54-0.35)	0 (-0.26-0.34)	0.6	0.9	0.6	0.9	0.68 (0.24-1.9)	0.76 (0.31-1.8)	0.5	0.8
	Liver_metsSig	0.04 (-0.24-0.64)	-0.07 (-0.27-0.31)	0.5	0.9	0.4	0.9	1.5 (0.55-4.1)	1.4 (0.56-3.8)	0.5	0.8

## Sheet: S3e_BV_ERneg
	ER-negative	BV SERIES
		Cases	Controls	Wilcoxon paired		Mann-Whitney U		Conditional LogReg	Logistic Regression
	Gene Modules	Median (IQR)	Median (IQR)	p	p (adj)	p	p (adj)	OR (95% CI)	OR (95% CI)	p	p (adj)
	AURKA	0.01 (-0.79-0.54)	-0.01 (-0.17-0.58)	0.4	0.7	0.8	0.9	0.5 (0.067-3.8)	0.55 (0.06-3.3)	0.5	0.8
	CIN70.Up	0.03 (-0.14-0.96)	-0.03 (-0.09-0.15)	0.8	0.8	1	1	1.3 (0.25-6.2)	1.3 (0.22-9.4)	0.8	0.9
	PTEN	0.05 (-0.68-0.59)	-0.05 (-0.1-0.34)	0.3	0.7	0.8	0.9	0.44 (0.056-3.5)	0.49 (0.047-3.1)	0.5	0.8
	GENE70	-0.08 (-0.44-0.08)	0.12 (-0.56-0.28)	0.6	0.7	0.8	0.9	1.2 (0.25-6)	1.3 (0.21-9.9)	0.8	0.9
	IGF1	-0.04 (-0.96--0.01)	0.02 (0.01-0.48)	0.4	0.7	0.3	0.8	0.5 (0.087-2.9)	0.41 (0.038-2.6)	0.4	0.8
	E2F3	0.06 (-0.06-0.6)	-0.49 (-0.83-0.14)	0.3	0.7	0.3	0.8	6.7 (0.23-200)	4.2 (0.61-74)	0.2	0.7
	AKTmTOR.Up	-0.05 (-0.48-0.01)	0.25 (-0.01-0.61)	0.3	0.7	0.5	0.9	0.057 (0.00028-12)	0.41 (0.032-2.6)	0.4	0.8
	Mid_burden	0.31 (0.29-0.56)	-0.66 (-0.71--0.29)	0.6	0.7	0.3	0.8	2.3 (0.49-11)	4.3 (0.66-62)	0.2	0.7
	Low_burden	0.39 (0.02-0.95)	-0.1 (-0.58--0.02)	0.4	0.7	0.2	0.8	3 (0.46-19)	4.4 (0.64-83)	0.2	0.7
	MaSC	0.24 (-0.25-0.47)	-0.24 (-0.4-0.63)	0.8	0.8	0.8	0.9	1.2 (0.26-6)	1.3 (0.22-9.4)	0.8	0.9
	HIS	-0.07 (-0.19-0.17)	0.07 (-0.17-0.61)	0.6	0.7	0.8	0.9	0.32 (0.031-3.4)	0.41 (0.022-2.4)	0.4	0.8
	hNMSC	0.22 (-0.29-0.46)	-0.22 (-0.8-0.43)	0.6	0.7	1	1	0.87 (0.078-9.6)	0.93 (0.15-5.4)	0.9	0.9
	Tcell	-0.06 (-0.24--0.03)	0.67 (0.2-1.33)	0.1	0.7	0.06	0.7	0.042 (0.00013-13)	0.0082 (1.9e-08-0.55)	0.2	0.7
	Stroma	0.37 (0.08-0.44)	-0.52 (-0.55--0.08)	0.4	0.7	0.4	0.9	1.9 (0.41-8.6)	3.1 (0.5-41)	0.3	0.8
	Immune1	-0.07 (-0.57-0.01)	0.17 (-0.01-0.35)	0.6	0.7	0.4	0.9	0.81 (0.19-3.4)	0.71 (0.083-4.6)	0.7	0.9
	Immune2	-0.25 (-0.33--0.13)	0.99 (0.06-1)	0.1	0.7	0.03	0.7	0.053 (6.6e-05-42)	0.012 (1.5e-07-0.52)	0.2	0.7
	Brain_infiltSig	-0.36 (-0.39-0.57)	0.14 (-0.14-0.47)	0.6	0.7	0.7	0.9	0.55 (0.099-3.1)	0.48 (0.051-2.9)	0.4	0.8
	Brain_metsSig	0.39 (0.18-0.59)	-0.31 (-0.99--0.18)	0.3	0.7	0.3	0.8	2.4 (0.46-13)	4.8 (0.67-93)	0.2	0.7
	MS_residual	-0.04 (-0.7-0.01)	0.26 (-0.01-0.47)	0.3	0.7	0.2	0.8	0.036 (2.8e-05-47)	0.2 (0.006-1.6)	0.2	0.7
	TBRS	0.06 (-0.06-0.19)	-0.07 (-0.23-0.19)	0.6	0.7	0.7	0.9	1.1 (0.22-6)	1.2 (0.16-11)	0.8	0.9
	SigA_TGFb	0.11 (-0.11-0.86)	-0.35 (-0.36-0.36)	1	1	0.8	0.9	1.1 (0.3-3.7)	1.1 (0.18-7.2)	0.9	0.9
	SigB_TGFb	-0.36 (-0.37-0.35)	0.06 (-0.06-0.79)	0.4	0.7	0.5	0.9	0.3 (0.016-5.6)	0.58 (0.067-3.7)	0.6	0.8
	Hypoxia_boneMets	-0.02 (-1.04-0.02)	0.09 (-0.7-0.39)	0.6	0.7	0.5	0.9	0.7 (0.19-2.5)	0.52 (0.067-2.8)	0.5	0.8
	Hypoxia_lungMets	0.21 (0.19-0.83)	-0.81 (-0.86--0.19)	0.4	0.7	0.2	0.8	2.5 (0.52-12)	4.8 (0.76-67)	0.1	0.7
	Bone_metsSig	-0.05 (-0.24-1.11)	0.05 (-0.18-0.06)	0.4	0.7	0.8	0.9	2.4 (0.33-18)	2.9 (0.43-46)	0.3	0.8
	Liver_metsSig	-0.11 (-0.54--0.05)	0.2 (0.05-0.26)	0.6	0.7	0.3	0.8	0.76 (0.16-3.6)	0.68 (0.072-4.4)	0.7	0.9

## Sheet: S3f_B_ERany
	Any ER status	B SERIES
		Cases	Controls	Wilcoxon paired		Mann-Whitney U		Conditional LogReg	Logistic Regression
	Gene Modules	Median (IQR)	Median (IQR)	p	p (adj)	p	p (adj)	OR (95% CI)	OR (95% CI)	p	p (adj)
Proliferation signatures (see Results section)	AURKA	0.02 (-0.4-0.33)	-0.07 (-0.61-0.55)	1	1	0.8	1	1.1 (0.61-1.9)	1.1 (0.69-1.7)	0.7	0.9	Proliferation signatures (see Results section)
	CIN70.Up	-0.01 (-0.49-0.34)	0.01 (-0.56-0.55)	0.9	1	1	1	0.94 (0.56-1.6)	0.98 (0.63-1.5)	0.9	0.9
	PTEN	0 (-0.38-0.42)	-0.03 (-0.42-0.61)	1	1	0.7	1	0.97 (0.56-1.7)	0.86 (0.53-1.4)	0.5	0.9
	GENE70	0.01 (-0.29-0.26)	-0.05 (-0.46-0.4)	0.6	1	0.8	1	0.85 (0.48-1.5)	0.86 (0.52-1.4)	0.6	0.9
	IGF1	0.06 (-0.39-0.35)	-0.13 (-0.47-0.42)	0.9	1	0.6	1	0.97 (0.48-2)	1.1 (0.66-1.8)	0.8	0.9
	E2F3	-0.04 (-0.31-0.39)	0.06 (-0.37-0.5)	0.8	1	0.6	1	1 (0.56-1.9)	0.85 (0.52-1.4)	0.5	0.9
	AKTmTOR.Up	0 (-0.4-0.32)	0.01 (-0.45-0.33)	0.9	1	0.9	1	1 (0.48-2.1)	0.96 (0.61-1.5)	0.9	0.9
	Mid_burden	-0.03 (-0.65-0.2)	0.04 (-0.52-0.38)	0.03	0.7	0.04	0.9	0.29 (0.11-0.81)	0.6 (0.37-0.96)	0.04	0.3
	Low_burden	-0.02 (-0.43-0.31)	0.02 (-0.31-0.33)	0.07	0.9	0.2	1	0.4 (0.17-0.93)	0.57 (0.34-0.94)	0.03	0.3
	MaSC	-0.02 (-0.52-0.39)	0.01 (-0.42-0.31)	0.9	1	1	1	0.89 (0.41-2)	0.85 (0.53-1.4)	0.5	0.9
	HIS	-0.05 (-0.44-0.23)	0.05 (-0.51-0.33)	0.6	1	0.5	1	0.93 (0.51-1.7)	0.86 (0.55-1.3)	0.5	0.9
	hNMSC	-0.02 (-0.37-0.36)	0 (-0.52-0.42)	0.7	1	0.9	1	1 (0.47-2.1)	1.1 (0.7-1.8)	0.7	0.9
	Tcell	-0.08 (-0.46-0.34)	0.06 (-0.26-0.44)	0.2	0.9	0.1	1	0.64 (0.32-1.3)	0.76 (0.46-1.2)	0.3	0.9
	Stroma	0 (-0.57-0.4)	-0.01 (-0.56-0.27)	0.8	1	1	1	0.97 (0.51-1.8)	0.93 (0.58-1.5)	0.8	0.9
	Immune1	0.05 (-0.43-0.38)	-0.01 (-0.35-0.4)	0.6	1	0.8	1	0.78 (0.4-1.5)	0.88 (0.55-1.4)	0.6	0.9
	Immune2	-0.01 (-0.4-0.31)	0 (-0.33-0.69)	0.3	1	0.2	1	0.74 (0.4-1.4)	0.75 (0.47-1.2)	0.2	0.9
	Brain_infiltSig	-0.04 (-0.47-0.28)	0.01 (-0.3-0.28)	0.3	1	0.3	1	0.65 (0.35-1.2)	0.68 (0.42-1.1)	0.1	0.6
	Brain_metsSig	-0.02 (-0.34-0.27)	0.02 (-0.16-0.35)	0.2	0.9	0.07	0.9	0.41 (0.18-0.95)	0.49 (0.28-0.84)	0.01	0.3
	MS_residual	0.03 (-0.4-0.49)	-0.02 (-0.38-0.36)	0.6	1	0.8	1	0.82 (0.43-1.6)	0.96 (0.63-1.5)	0.8	0.9
	TBRS	0.01 (-0.48-0.48)	0 (-0.28-0.25)	0.6	1	0.7	1	1.2 (0.58-2.3)	1 (0.65-1.6)	0.9	0.9
	SigA_TGFb	0.02 (-0.55-0.5)	-0.03 (-0.54-0.28)	0.9	1	0.7	1	0.99 (0.51-1.9)	1.1 (0.67-1.7)	0.8	0.9
	SigB_TGFb	0.03 (-0.26-0.25)	-0.02 (-0.5-0.23)	0.1	0.9	0.3	1	1.9 (0.95-3.6)	1.6 (1-2.6)	0.05	0.3
	Hypoxia_boneMets	0.01 (-0.43-0.38)	-0.03 (-0.36-0.43)	0.6	1	0.9	1	0.89 (0.46-1.7)	0.94 (0.59-1.5)	0.8	0.9
	Hypoxia_lungMets	-0.03 (-0.31-0.3)	0.07 (-0.45-0.39)	0.7	1	0.4	1	1.1 (0.53-2.3)	0.84 (0.51-1.4)	0.5	0.9
	Bone_metsSig	0 (-0.31-0.38)	0 (-0.27-0.22)	0.8	1	0.9	1	1.1 (0.55-2)	0.84 (0.51-1.4)	0.5	0.9
	Liver_metsSig	0 (-0.31-0.7)	-0.01 (-0.24-0.45)	0.6	1	0.5	1	1.5 (0.7-3.2)	1.3 (0.82-2.2)	0.3	0.9

## Sheet: S3g_B_ERpos
	ER-positive	B SERIES
		Cases	Controls	Wilcoxon paired		Mann-Whitney U		Conditional LogReg	Logistic Regression
	Gene Modules	Median (IQR)	Median (IQR)	p	p (adj)	p	p (adj)	OR (95% CI)	OR (95% CI)	p	p (adj)
	AURKA	0.24 (-0.25-0.69)	-0.13 (-0.48-0.34)	0.2	0.8	0.1	0.7	2.1 (0.79-5.5)	1.9 (0.83-4.7)	0.1	0.6
	CIN70.Up	0.25 (-0.44-0.7)	-0.11 (-0.43-0.25)	0.1	0.8	0.1	0.7	2.1 (0.76-5.6)	1.9 (0.8-4.6)	0.2	0.6
	PTEN	0.48 (-0.23-0.83)	-0.2 (-0.33-0.33)	0.05	0.8	0.07	0.7	2.1 (0.86-5.1)	2.1 (0.93-4.9)	0.08	0.6
	GENE70	0.09 (-0.2-0.75)	-0.13 (-0.38-0.52)	0.5	0.8	0.2	0.7	1.3 (0.6-2.8)	1.4 (0.6-3.3)	0.5	0.7
	IGF1	0.1 (-0.42-0.44)	-0.09 (-0.6-0.18)	0.4	0.8	0.3	0.7	1.5 (0.64-3.3)	1.5 (0.65-3.4)	0.4	0.7
	E2F3	-0.05 (-0.28-0.66)	0.05 (-0.55-0.33)	0.1	0.8	0.2	0.7	2.7 (0.91-8.1)	2.2 (0.94-5.7)	0.08	0.6
	AKTmTOR.Up	0.07 (-0.54-0.43)	-0.14 (-0.53-0.19)	0.4	0.8	0.3	0.7	1.7 (0.66-4.2)	1.6 (0.68-3.8)	0.3	0.7
	Mid_burden	-0.09 (-0.61-0.31)	0.07 (-0.55-0.46)	0.4	0.8	0.4	0.7	0.55 (0.22-1.4)	0.61 (0.26-1.3)	0.2	0.7
	Low_burden	0.01 (-0.83-0.4)	0 (-0.47-0.29)	0.6	0.8	0.5	0.8	0.67 (0.31-1.4)	0.66 (0.29-1.4)	0.3	0.7
	MaSC	-0.04 (-0.46-0.33)	0.07 (-0.32-0.23)	0.7	0.8	0.6	0.9	0.67 (0.24-1.9)	0.74 (0.29-1.8)	0.5	0.7
	HIS	0 (-0.44-0.34)	-0.03 (-0.51-0.18)	0.2	0.8	0.2	0.7	1.8 (0.73-4.4)	1.9 (0.78-4.9)	0.2	0.6
	hNMSC	0 (-0.3-0.38)	0.09 (-0.53-0.26)	0.7	0.8	0.8	0.9	1.4 (0.53-3.8)	1.4 (0.55-3.5)	0.5	0.7
	Tcell	-0.04 (-0.46-0.46)	0.14 (-0.36-0.33)	0.7	0.8	0.7	0.9	0.89 (0.39-2)	0.9 (0.4-2)	0.8	0.9
	Stroma	0 (-0.4-0.22)	0.04 (-0.39-0.23)	0.6	0.8	0.7	0.9	0.69 (0.29-1.6)	0.68 (0.28-1.6)	0.4	0.7
	Immune1	-0.06 (-0.52-0.25)	0.02 (-0.32-0.25)	0.6	0.8	0.5	0.8	0.71 (0.3-1.7)	0.7 (0.29-1.6)	0.4	0.7
	Immune2	0.07 (-0.3-0.43)	-0.01 (-0.17-0.61)	0.7	0.8	0.9	0.9	0.95 (0.45-2)	0.93 (0.41-2.1)	0.9	0.9
	Brain_infiltSig	0.02 (-0.35-0.3)	-0.02 (-0.25-0.13)	0.8	0.8	0.8	0.9	1 (0.46-2.2)	1 (0.42-2.5)	1	1
	Brain_metsSig	0.03 (-0.39-0.25)	-0.02 (-0.4-0.21)	0.7	0.8	1	1	0.9 (0.42-1.9)	0.89 (0.4-2)	0.8	0.9
	MS_residual	-0.1 (-0.51-0.59)	0.06 (-0.28-0.58)	0.5	0.8	0.3	0.7	0.77 (0.37-1.6)	0.75 (0.34-1.6)	0.4	0.7
	TBRS	0.18 (-0.27-0.56)	-0.03 (-0.3-0.33)	0.4	0.8	0.4	0.7	1.3 (0.54-3.2)	1.3 (0.55-3.1)	0.6	0.7
	SigA_TGFb	-0.27 (-0.41-0.41)	0.06 (-0.42-0.23)	0.8	0.8	0.7	0.9	0.83 (0.34-2)	0.85 (0.37-1.9)	0.7	0.9
	SigB_TGFb	0.16 (-0.39-0.51)	-0.12 (-0.43-0.18)	0.2	0.8	0.08	0.7	1.8 (0.82-3.9)	2.3 (0.94-6)	0.08	0.6
	Hypoxia_boneMets	0 (-0.51-0.37)	0.06 (-0.22-0.64)	0.1	0.8	0.2	0.7	0.47 (0.18-1.2)	0.46 (0.17-1.1)	0.1	0.6
	Hypoxia_lungMets	-0.01 (-0.31-0.26)	0.02 (-0.17-0.32)	0.8	0.8	0.6	0.9	0.89 (0.32-2.5)	0.91 (0.35-2.3)	0.8	0.9
	Bone_metsSig	0.23 (-0.3-0.47)	-0.11 (-0.33-0.11)	0.4	0.8	0.2	0.7	1.6 (0.71-3.4)	1.6 (0.73-3.9)	0.2	0.7
	Liver_metsSig	0.03 (-0.21-0.74)	-0.03 (-0.23-0.51)	0.4	0.8	0.5	0.8	1.7 (0.68-4)	1.6 (0.7-3.8)	0.3	0.7

## Sheet: S3h_anyCaseType_ERany
	Any ER status	Any Case Type
		Cases	Controls	Wilcoxon paired		Mann-Whitney U		Conditional LogReg	Logistic Regression
	Gene modules	Median (IQR)	Median (IQR)	p	p (adj)	p	p (adj)	OR (95% CI)	OR (95% CI)	p	p (adj)
Proliferation signatures (see Results section)	AURKA	0.12 (-0.28-0.48)	-0.23 (-0.66-0.37)	0.004	0.03	2e-06	2e-05	1.7 (1.2-2.5)	2 (1.5-2.7)	2e-06	2e-05	Proliferation signatures (see Results section)
	CIN70.Up	0.09 (-0.3-0.48)	-0.25 (-0.69-0.33)	0.003	0.03	1e-06	2e-05	1.7 (1.2-2.4)	2 (1.5-2.6)	1e-06	2e-05
	PTEN	0.1 (-0.25-0.5)	-0.18 (-0.56-0.41)	0.005	0.04	1e-04	7e-04	1.6 (1.1-2.4)	1.7 (1.3-2.2)	5e-04	0.002
	GENE70	0.1 (-0.25-0.46)	-0.17 (-0.5-0.31)	0.03	0.1	4e-06	3e-05	1.5 (1-2.2)	1.8 (1.4-2.5)	8e-05	5e-04
	IGF1	0.09 (-0.28-0.46)	-0.22 (-0.62-0.32)	0.08	0.2	6e-06	4e-05	1.5 (0.98-2.2)	1.8 (1.4-2.5)	5e-05	4e-04
	E2F3	0.05 (-0.25-0.47)	-0.07 (-0.39-0.27)	0.003	0.03	9e-04	0.003	1.7 (1.1-2.5)	1.4 (1.1-1.9)	0.009	0.04
	AKTmTOR.Up	0.11 (-0.32-0.43)	-0.14 (-0.6-0.29)	0.008	0.04	2e-04	9e-04	1.7 (1.1-2.6)	1.4 (1.1-1.8)	0.01	0.04
	Mid_burden	0 (-0.46-0.36)	0 (-0.42-0.37)	0.3	0.4	0.9	0.9	0.85 (0.57-1.3)	0.97 (0.74-1.3)	0.8	0.9
	Low_burden	0.02 (-0.35-0.36)	-0.01 (-0.3-0.24)	0.8	0.8	0.4	0.5	0.95 (0.63-1.4)	1.1 (0.84-1.5)	0.4	0.6
	MaSC	-0.01 (-0.46-0.35)	0.02 (-0.39-0.36)	0.5	0.7	0.3	0.4	0.86 (0.57-1.3)	0.8 (0.61-1.1)	0.1	0.2
	HIS	0.01 (-0.38-0.39)	-0.07 (-0.5-0.32)	0.1	0.3	0.1	0.2	1.3 (0.93-2)	1.1 (0.89-1.4)	0.3	0.5
	hNMSC	0.04 (-0.36-0.43)	-0.06 (-0.51-0.37)	0.3	0.4	0.03	0.09	1.3 (0.89-2)	1.4 (1.1-1.9)	0.02	0.05
	Tcell	-0.05 (-0.4-0.34)	0.04 (-0.35-0.42)	0.3	0.4	0.1	0.2	0.84 (0.57-1.3)	0.79 (0.6-1.1)	0.1	0.2
	Stroma	-0.04 (-0.54-0.3)	0.06 (-0.37-0.39)	0.2	0.3	0.07	0.2	0.73 (0.5-1.1)	0.77 (0.58-1)	0.06	0.1
	Immune1	-0.03 (-0.43-0.4)	0.01 (-0.31-0.44)	0.3	0.4	0.2	0.4	0.88 (0.61-1.3)	0.82 (0.62-1.1)	0.2	0.3
	Immune2	0 (-0.41-0.41)	0 (-0.38-0.52)	0.5	0.7	0.5	0.6	0.91 (0.63-1.3)	0.91 (0.69-1.2)	0.5	0.7
	Brain_infiltSig	-0.03 (-0.43-0.3)	0.04 (-0.31-0.32)	0.07	0.2	0.1	0.3	0.73 (0.52-1)	0.85 (0.64-1.1)	0.3	0.4
	Brain_metsSig	0 (-0.28-0.46)	-0.01 (-0.26-0.33)	0.6	0.7	0.5	0.6	0.89 (0.59-1.3)	1.1 (0.82-1.5)	0.6	0.7
	MS_residual	-0.01 (-0.45-0.43)	0.02 (-0.34-0.58)	0.02	0.08	0.04	0.1	0.65 (0.44-0.94)	0.78 (0.6-1)	0.05	0.1
	TBRS	0.01 (-0.47-0.45)	-0.02 (-0.34-0.31)	0.8	0.9	0.7	0.8	0.98 (0.67-1.4)	1 (0.78-1.3)	0.9	1
	SigA_TGFb	-0.04 (-0.56-0.35)	0.03 (-0.34-0.41)	0.1	0.3	0.03	0.09	0.73 (0.5-1.1)	0.77 (0.59-1)	0.06	0.1
	SigB_TGFb	-0.01 (-0.43-0.25)	0 (-0.34-0.23)	0.5	0.7	0.9	0.9	1.2 (0.79-1.7)	1 (0.76-1.3)	1	1
	Hypoxia_boneMets	-0.02 (-0.39-0.42)	0.01 (-0.3-0.34)	1	1	0.6	0.6	0.97 (0.68-1.4)	1 (0.81-1.3)	0.8	0.9
	Hypoxia_lungMets	-0.06 (-0.44-0.29)	0.03 (-0.42-0.37)	0.8	0.8	0.2	0.4	0.94 (0.64-1.4)	0.85 (0.64-1.1)	0.3	0.4
	Bone_metsSig	0.01 (-0.32-0.39)	-0.01 (-0.27-0.24)	0.5	0.7	0.4	0.5	1.2 (0.79-1.8)	1 (0.78-1.4)	0.8	0.9
	Liver_metsSig	0.04 (-0.32-0.58)	-0.05 (-0.37-0.4)	0.08	0.2	0.06	0.1	1.5 (1-2.2)	1.3 (1-1.8)	0.04	0.1

## Sheet: S3i_anyCaseType_ERpos
	ER-positive	Any Case Type
		Cases	Controls	Wilcoxon paired		Mann-Whitney U		Conditional LogReg	Logistic Regression
	Gene Modules	Median (IQR)	Median (IQR)	p	p (adj)	p	p (adj)	OR (95% CI)	OR (95% CI)	p	p (adj)
Proliferation signatures (see Results section)	AURKA	0.19 (-0.22-0.59)	-0.23 (-0.54-0.28)	9e-05	4e-04	9e-05	7e-04	3.4 (1.7-6.8)	3.2 (1.8-5.9)	1e-04	8e-04	Proliferation signatures (see Results section)
	CIN70.Up	0.27 (-0.22-0.68)	-0.25 (-0.53-0.29)	7e-05	4e-04	8e-05	7e-04	3.3 (1.7-6.3)	3.2 (1.8-5.8)	8e-05	8e-04
	PTEN	0.34 (-0.11-0.81)	-0.21 (-0.52-0.29)	7e-06	2e-04	5e-06	1e-04	3.8 (1.9-7.5)	3.6 (2.1-6.6)	2e-05	4e-04
	GENE70	0.16 (-0.25-0.63)	-0.27 (-0.51-0.32)	0.003	0.01	0.002	0.007	2.3 (1.3-4)	2.3 (1.4-4.2)	0.002	0.008
	IGF1	0.13 (-0.32-0.47)	-0.17 (-0.6-0.31)	0.02	0.05	0.01	0.04	1.9 (1.1-3.4)	1.9 (1.1-3.3)	0.02	0.04
	E2F3	0.18 (-0.19-0.79)	-0.17 (-0.54-0.26)	1e-05	2e-04	1e-04	7e-04	5 (2.1-12)	3.2 (1.8-6)	1e-04	8e-04
	AKTmTOR.Up	0.22 (-0.27-0.58)	-0.13 (-0.69-0.26)	9e-05	4e-04	4e-04	0.002	3.1 (1.6-6.1)	2.5 (1.5-4.3)	0.001	0.005
	Mid_burden	-0.09 (-0.56-0.38)	0.07 (-0.33-0.48)	0.1	0.2	0.1	0.2	0.6 (0.33-1.1)	0.68 (0.4-1.1)	0.1	0.2
	Low_burden	-0.04 (-0.62-0.33)	0.06 (-0.33-0.27)	0.3	0.4	0.4	0.5	0.74 (0.44-1.3)	0.76 (0.45-1.3)	0.3	0.4
	MaSC	-0.04 (-0.54-0.28)	0.07 (-0.3-0.43)	0.2	0.3	0.2	0.2	0.68 (0.39-1.2)	0.73 (0.43-1.2)	0.2	0.3
HIS (Results section)	HIS	0.11 (-0.22-0.51)	-0.14 (-0.62-0.16)	1e-04	4e-04	6e-04	0.002	3.5 (1.7-7.6)	2.7 (1.5-5)	9e-04	0.005	HIS (Results section)
	hNMSC	0.01 (-0.29-0.52)	-0.01 (-0.55-0.41)	0.1	0.2	0.1	0.2	1.7 (0.95-3)	1.6 (0.94-2.6)	0.09	0.2
	Tcell	-0.1 (-0.37-0.27)	0.06 (-0.36-0.25)	0.5	0.6	0.4	0.5	0.85 (0.49-1.5)	0.86 (0.5-1.5)	0.6	0.7
	Stroma	-0.06 (-0.68-0.21)	0.11 (-0.2-0.4)	0.03	0.08	0.03	0.06	0.52 (0.3-0.9)	0.51 (0.29-0.86)	0.01	0.04
	Immune1	-0.08 (-0.46-0.45)	0.05 (-0.29-0.39)	0.3	0.4	0.2	0.3	0.78 (0.45-1.3)	0.79 (0.46-1.3)	0.4	0.5
	Immune2	0.03 (-0.34-0.4)	-0.05 (-0.43-0.46)	0.9	1	0.8	0.9	1.1 (0.64-1.8)	1.1 (0.63-1.8)	0.8	0.9
	Brain_infiltSig	-0.11 (-0.5-0.3)	0.07 (-0.25-0.27)	0.2	0.3	0.1	0.2	0.63 (0.37-1.1)	0.61 (0.35-1)	0.07	0.1
	Brain_metsSig	-0.01 (-0.37-0.42)	0.01 (-0.37-0.34)	1	1	0.9	1	0.93 (0.53-1.6)	0.94 (0.55-1.6)	0.8	0.9
	MS_residual	-0.24 (-0.56-0.44)	0.13 (-0.22-0.79)	0.002	0.008	4e-04	0.002	0.47 (0.28-0.79)	0.47 (0.28-0.75)	0.002	0.008
	TBRS	-0.03 (-0.42-0.45)	0.07 (-0.26-0.46)	0.3	0.4	0.4	0.5	0.86 (0.53-1.4)	0.86 (0.52-1.4)	0.5	0.7
	SigA_TGFb	-0.21 (-0.6-0.22)	0.08 (-0.31-0.35)	0.03	0.08	0.02	0.04	0.59 (0.35-1)	0.59 (0.35-0.98)	0.05	0.1
	SigB_TGFb	0.1 (-0.42-0.5)	-0.09 (-0.52-0.26)	0.1	0.2	0.04	0.09	1.5 (0.93-2.5)	1.6 (0.96-2.6)	0.08	0.1
	Hypoxia_boneMets	-0.01 (-0.41-0.46)	0.03 (-0.36-0.39)	0.9	1	0.8	0.9	0.92 (0.6-1.4)	0.92 (0.58-1.4)	0.7	0.8
	Hypoxia_lungMets	-0.01 (-0.43-0.42)	0 (-0.45-0.42)	0.9	1	1	1	1.1 (0.6-1.8)	1 (0.63-1.7)	0.9	0.9
	Bone_metsSig	0.06 (-0.27-0.36)	-0.04 (-0.29-0.31)	0.4	0.5	0.4	0.5	1.4 (0.81-2.4)	1.4 (0.82-2.4)	0.2	0.3
	Liver_metsSig	0.14 (-0.27-0.64)	-0.12 (-0.34-0.41)	0.04	0.08	0.05	0.1	1.8 (1-3.2)	1.7 (1-2.9)	0.04	0.09

[truncated: 1 more sheets: S3j_anyCaseType_ERneg]
